# Supplementary material
Source: PubMed Central journal article supplement (PMC5441561)
Supplement: NIHMS860894-supplement-Tseng-SM.pdf [file NIHMS860894-supplement-Tseng-SM.pdf]

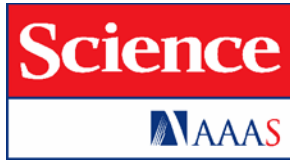

## Supplementary Materials for

### **Structural basis of the day-night transition in a bacterial circadian clock**

Roger Tseng,\* Nicolette F. Goularte,\* Archana Chavan,\* Jansen Luu,  
Susan E. Cohen, Yong-Gang Chang, Joel Heisler, Sheng Li, Alicia K. Michael,  
Sarvind Tripathi, Susan S. Golden, Andy LiWang,<sup>†</sup> Carrie L. Partch<sup>†</sup>

\*These authors contributed equally to this work.

<sup>†</sup>Corresponding author. Email: aliwang@ucmerced.edu (A.L.); cpartch@ucsc.edu (C.L.P.)

Published 17 March 2017, *Science* **355**, 1174 (2017)

DOI: 10.1126/science.aag2516

#### **This PDF file includes:**

Materials and Methods

Figs. S1 to S11

Tables S1 to S13

References

## Table of Contents

|                                                                                                                                                                                   |    |
|-----------------------------------------------------------------------------------------------------------------------------------------------------------------------------------|----|
| Materials and Methods.....                                                                                                                                                        | 3  |
| Fig. S1. Minimal constructs of <i>Thermosynechococcus elongatus</i> proteins.....                                                                                                 | 8  |
| Fig. S2. Stoichiometry of the KaiB <sub>fs-cryst*</sub> -KaiC <sub>S431E</sub> complex.....                                                                                       | 9  |
| Fig. S3. Analysis of the KaiB <sub>fs-cryst*</sub> -KaiC <sub>S431E</sub> complex.....                                                                                            | 10 |
| Fig. S4. Analysis of CI ATPase activity versus clock period data in Figure 1G of the paper by Abe et al. <i>Science</i> (2015) 349: 312-316.....                                  | 11 |
| Fig. S5. NMR of KaiA <sub>ΔN</sub> -KaiB <sub>fs-cryst</sub> -CI <sub>mono</sub> and CikA <sub>P<sub>SR</sub></sub> -KaiB <sub>fs</sub> -CI <sub>mono</sub> interactions.....     | 12 |
| Fig. S6. Rotations of KaiA <sub>cryst</sub> β6 strands in the KaiA <sub>cryst</sub> -KaiB <sub>fs-cryst</sub> -CI <sub>cryst</sub> complex.....                                   | 13 |
| Fig. S7. HDX-MS and mutagenesis of KaiA <sub>ΔN</sub> -KaiB <sub>fs-cryst</sub> interface.....                                                                                    | 14 |
| Fig. S8. NMR and <i>in vivo</i> experiments of KaiA, KaiB, and CikA <sub>P<sub>SR</sub></sub> mutants.....                                                                        | 15 |
| Fig. S9. Superposition of the KaiA <sub>cryst</sub> -KaiB <sub>fs-cryst</sub> -CI <sub>cryst</sub> complex onto the KaiB <sub>fs-cryst*</sub> -KaiC <sub>S431E</sub> hexamer..... | 16 |
| Fig. S10. HDX-MS and mutagenesis of the CikA <sub>P<sub>SR</sub></sub> -KaiB <sub>fs-nmr</sub> complex.....                                                                       | 17 |
| Fig. S11. Interacting residues of KaiB to KaiA <sub>cryst</sub> and CikA <sub>P<sub>SR</sub></sub> .....                                                                          | 18 |
| Table S1. Abbreviation and full name of proteins used in each experimental condition.....                                                                                         | 19 |
| Table S2. Crystal structures and refinement statistics (molecular replacement).....                                                                                               | 36 |
| Table S3. NMR structures and refinement statistics.....                                                                                                                           | 37 |
| Table S4. HDX-MS deuterium uptake profile of KaiA <sub>ΔN</sub> free and bound to KaiB <sub>fs-cryst</sub> -CI <sub>cryst</sub> complex.....                                      | 38 |
| Table S5. HDX-MS difference profile between KaiA <sub>ΔN</sub> free and bound to KaiB <sub>fs-cryst</sub> -CI <sub>cryst</sub> complex.....                                       | 40 |
| Table S6. HDX-MS deuterium uptake profile of KaiB <sub>fs-cryst</sub> -CI <sub>cryst</sub> complex with and without KaiA <sub>ΔN</sub> .....                                      | 43 |
| Table S7. HDX-MS difference profile between KaiB <sub>fs-cryst</sub> -CI <sub>cryst</sub> complex with and without KaiA <sub>ΔN</sub> .....                                       | 44 |
| Table S8. HDX-MS deuterium uptake profile of KaiB <sub>fs-nmr</sub> free and bound to CikA <sub>P<sub>SR</sub></sub> .....                                                        | 47 |
| Table S9. HDX-MS difference profile between KaiB <sub>fs-nmr</sub> free and bound to CikA <sub>P<sub>SR</sub></sub> .....                                                         | 51 |
| Table S10. HDX-MS deuterium uptake profile of CikA <sub>P<sub>SR</sub></sub> free and bound to KaiB <sub>fs-nmr</sub> .....                                                       | 54 |
| Table S11. HDX-MS difference profile between CikA <sub>P<sub>SR</sub></sub> free and bound to KaiB <sub>fs-nmr</sub> .....                                                        | 57 |
| Table S12. Plasmids for making cyanobacterial strains used in this study.....                                                                                                     | 60 |
| Table S13. Cyanobacterial strains used in this study.....                                                                                                                         | 61 |
| References.....                                                                                                                                                                   | 62 |

## **Materials and Methods**

### Cloning of constructs

All genes were cloned into pET-28b vector using the Nde I/Hind III sites by PCR. Details of the cloning protocol have been described previously (27). Please see table S1 for full list of constructs.

### Protein expression, purification and fluorescence labeling

Proteins were expressed in BL21(DE3) *Escherichia coli* (Novagen) and purified by Ni-NTA affinity chromatography and size-exclusion chromatography as described previously (27-29), except that the CII peptides of KaiC were purified by C4 reverse-phase chromatography column (Vydac, Hesperia, CA) with sample loading buffer consisting of H<sub>2</sub>O+0.1% trifluoroacetic acid (TFA) and elution buffer consisting of 100% acetonitrile+0.1% TFA. Gradient elution was set to reach 100% elution buffer in 100 minutes at 1.0 mL/min flow rate. Fluorescent labeling of the CII peptides was described previously (28).

### Analytical size exclusion chromatography

All experiments were performed with a Superdex 200 or a Superdex S75 10/300 GL column (GE Healthcare) as described previously (29), except that the sample injection volume was 250  $\mu$ L. Desired protein sample(s) and buffer were mixed to a total of 250  $\mu$ L, with or without incubation time at room temperature depending on experimental needs. The reaction sample(s) was then applied with a flow rate of 0.5 mL/min, at room temperature. The volume of the sample loop was 100  $\mu$ L. Details of experimental conditions are provided in table S1. Molecular weight markers were: albumin (67 kDa), ovalbumin (43 kDa), chymotrypsinogen A (25 kDa), and ribonuclease A (13.7 kDa) (GE Healthcare).

### Fluorescence spectroscopy

All data were collected with an ISS PC1 spectrofluorometer. The thiol-reactive fluorophore used was 6-iodoacetamidofluorescein (6-IAF) (Invitrogen). Instrument setup was as previously described (29), except that a three-cuvette sample holder was used to measure triplicates simultaneously. Anisotropy measurements started immediately following a 5-minute incubation. One measurement was taken every minute for 5 minutes they were averaged to determine the starting anisotropy value. For experimental conditions, please see table S1.

### Light scattering

Absolute molecular weight calculations were obtained by static light scattering in-line with size exclusion chromatography using a Wyatt Optilab T-rEX refractometer and miniDAWN Treos multiangle light scattering system at 4 °C. Proteins were incubated overnight in a 1:3 ratio of KaiC<sub>S431E</sub>:KaiB<sub>fs-cryt\*</sub> (with 30  $\mu$ M KaiC<sub>S431E</sub>) in a binding buffer of 20 mM Tris pH 7.0, 150 mM NaCl, 5 mM DTT, 1 mM MgCl<sub>2</sub>, 1 mM ATP. Protein samples (injection volume of 100  $\mu$ L) were run at a 0.5 mL/min flow rate on a Superose 6 10/300 analytical gel filtration column (GE Healthcare) in a running buffer of 20 mM Tris pH 7.0, 150 mM NaCl, 5 mM DTT, 0.5 mM MgCl<sub>2</sub>, 0.5 mM ATP. Protein concentrations were monitored by a refractometer and light scattering directly after the

gel filtration column. Absolute molecular weights were determined using ASTRA version 6.0 (Wyatt Technologies).

### Crystallization and X-ray data collection

Crystallization of the KaiB<sub>fs-cryst</sub>\*-KaiC<sub>S431E</sub> complex was carried out using the hanging-drop diffusion method at 22 °C by mixing a 2:1 ratio of protein (12.5 mg/mL) with a reservoir solution containing 0.1 M sodium citrate pH 5.75 and 22% PEG3000. Before being flash frozen in liquid nitrogen, crystals were soaked in reservoir solution with increasing concentrations of glycerol, up to a final concentration of 25% (v/v), as the cryoprotectant. Crystals of the KaiB<sub>fs-cryst</sub>-CI<sub>cryst</sub> complex were grown at 22 °C in a 1:2 ratio of protein (20 mg/mL) with a reservoir solution containing 0.2 M potassium acetate, 10% (w/v) PEG3350, and 2.5% glycerol. Crystals of the KaiA<sub>cryst</sub>-KaiB<sub>fs-cryst</sub>-CI<sub>cryst</sub> complex grew using 25 mg/mL protein mixed in a 1:2 ratio with a reservoir solution containing 0.15 M ammonium sulfate, 0.1 M Tris pH 7.0, and 10% PEG4000. Crystals of both KaiB<sub>fs-cryst</sub>-CI<sub>cryst</sub> and KaiA<sub>cryst</sub>-KaiB<sub>fs-cryst</sub>-CI<sub>cryst</sub> were flash frozen after soaking in reservoir solution with 12.5% glycerol. For the KaiB<sub>fs-cryst</sub>\*-KaiC<sub>S431E</sub> complex, diffraction data were collected at the Advanced Photon Source at the Argonne National Laboratory 23-ID-B beamline at 100K and processed using the HKL2000 program. Diffraction data for KaiB<sub>fs-cryst</sub>-CI<sub>cryst</sub> and KaiA<sub>cryst</sub>-KaiB<sub>fs-cryst</sub>-CI<sub>cryst</sub> crystals were collected at the Advanced Light Source at Lawrence Berkeley National Laboratory at the 8.3.1 beamline at 100K. KaiB<sub>fs-cryst</sub>-CI<sub>cryst</sub> data were processed using Mosflm and Scala, while KaiA<sub>cryst</sub>-KaiB<sub>fs-cryst</sub>-CI<sub>cryst</sub> data were processed with HKL2000.

### Structure determination and refinement

The structures of KaiB<sub>fs-cryst</sub>-CI<sub>cryst</sub> and KaiA<sub>cryst</sub>-KaiB<sub>fs-cryst</sub>-CI<sub>cryst</sub> complexes were solved by molecular replacement with Phaser, using the KaiB<sub>fs-nmr</sub> solution structure (5JYT) as well as modified domains of KaiA and KaiC from coordinates 4O0M and 1V2Z as search models. Further manual model building was done using Coot (62), combined with structure refinement in Phenix (63). The structure of the KaiB<sub>fs-cryst</sub>\*-KaiC<sub>S431E</sub> complex was solved by molecular replacement using the isolated hexameric CII ring from coordinate 4O0M and the binary KaiB<sub>fs-cryst</sub>-CI<sub>cryst</sub> complex as a starting model, and further refined in a similar way. Refinement statistics and crystallographic data can be found in table S2. Protein-protein interfaces were analyzed with PDBePISA (64) ([http://www.ebi.ac.uk/pdbe/prot\\_int/pistart.html](http://www.ebi.ac.uk/pdbe/prot_int/pistart.html)). Structural figures were made with UCSF Chimera software (65).

### Cyanobacterial strains, culture conditions and DNA manipulations

Plasmids and *S. elongatus* PCC 7942 strains are described in tables S12 and S13. All *S. elongatus* strains were grown as previously described (66, 67). Plasmids were constructed using the GeneArt Seamless Cloning and Assembly Kit (Life Technologies) and propagated in *Escherichia coli* DH5 $\alpha$ . Mutant alleles were made using the QuikChange (Stratagene) protocol and clones were verified by DNA sequencing.

### In vivo bioluminescence monitoring

Bioluminescence from luciferase reporter cyanobacterial strains was monitored at 30 °C under constant light (LL) conditions after two cycles of 12 h light:12 h dark to



synchronize the population as described previously (66). Data were analyzed with Microsoft Excel and the Biological Rhythms Analysis Software System (<http://millar.bio.ed.ac.uk/pebrow/brass/brasspage.htm>).

### Live-cell microscopy

Cells were placed on a pad of 1.2% agarose in BG-11 media and covered with a coverslip. Microscopy was performed with a DeltaVision Core system (Applied Precision) with a WeatherStation attached to an Olympus IX71 inverted microscope and an Olympus Plan Apochromat 100× objective at 30 °C. To image autofluorescence emitted from photosynthetic pigments, a tetramethyl rhodamine isocyanate (TRITC) filter set was used (EX555/EM617) with an exposure time of 0.1 s. Images were captured using a CoolSnap HQ CCD camera (Photometrics) and deconvolved using the SoftWorx imaging program (Applied Precision). Cell length measurements were determined using SoftWorx imaging software. Statistics of cell lengths were analyzed with Graphpad Prism.

### Hydrogen deuterium exchange mass spectroscopy (HDX-MS)

The protocols for proteolysis, hydrogen/deuterium exchange and LC/MS analysis were similar to previously described (39). Various protein ratios were used for KaiA<sub>ΔN</sub>-KaiB<sub>fs-cryst</sub>-CI<sub>cryst</sub> samples to probe the relative hydrogen/deuterium exchange of KaiA<sub>ΔN</sub> free and mixed with KaiB<sub>fs-cryst</sub>-CI<sub>cryst</sub> (1.0:1.2:1.44 ratio for KaiA<sub>ΔN</sub>:KaiB<sub>fs-cryst</sub>:CI<sub>cryst</sub>), or KaiB<sub>fs-cryst</sub>-CI<sub>cryst</sub> in the absence or the presence of KaiA<sub>ΔN</sub> (1.2:1.0:1.2 for KaiA<sub>ΔN</sub>:KaiB<sub>fs-cryst</sub>:CI<sub>cryst</sub>). For the binary sample, CikA<sub>P<sub>SR</sub></sub>:KaiB<sub>fs-nmr</sub> was prepared with 1.0:1.2 ratio to detect exchange for CikA<sub>P<sub>SR</sub></sub> and 1.2:1.0 ratio to detect exchange for KaiB<sub>fs-nmr</sub>. Labeling time points before quenching were 10, 100 and 1000 seconds. The optimized quench condition was 3.2 M GuHCl for the KaiA<sub>ΔN</sub>-KaiB<sub>fs-cryst</sub>-CI<sub>cryst</sub> complex or 1.6 M GuHCl for the CikA<sub>P<sub>SR</sub></sub>-KaiB<sub>fs-nmr</sub> complex. Sub-localized exchange level was analyzed as described previously (68) and datasets are listed in tables S4 to S11. The 100 s difference profiles of significantly protected regions from tables S5, S7, S9 and S11 were mapped to the structures of KaiA<sub>cryst</sub>-KaiB<sub>fs-cryst</sub>-CI<sub>cryst</sub> and CikA<sub>P<sub>SR</sub></sub>-KaiB<sub>fs-nmr</sub> in figs. S7 and S10, respectively.

### NMR spectroscopy

A Bruker 600 MHz AVANCE III spectrometer equipped with a TCI cryoprobe was used for all of the NMR experiments described here. Chemical shifts were referenced to internal 2,2-dimethyl-2-silapentane-5-sulfonate. Data were processed using NMRPipe and visualized using NMRDraw (69). Assignments were analyzed using PIPP (70) and XIPP (71). For the single-entity protein structures, all experiments were performed at 25 °C. For the binary CikA<sub>P<sub>SR</sub></sub>-KaiB<sub>fs-nmr</sub> complex, all experiments were performed at 50 °C. 3D NMR experiments used to assign backbone, sidechain and intramolecular proton nuclear Overhauser effects (NOEs) and residual dipolar couplings (RDCs) were: HNCACB, HN(CO)CACB, HN(CA)CO, HNCO, HBHA(CO)NH, HCC(CO)NH, <sup>15</sup>N-NOESY-HSQC, <sup>13</sup>C-NOESY-HSQC, HCCH-COSY, HCAN, HCA(CO)N, IPAP-J-HNCO(CA) for <sup>1</sup>J(CA-HA), IPAP-J-HNCO for <sup>1</sup>J(N-H), and IPAP-J-HNCO for <sup>1</sup>J(CA-CO). For the binary complex, additional experiments for assigning side chain chemical shifts, intramolecular NOESY cross peaks, and RDCs were: 3D HCCH-TOCSY, <sup>13</sup>C-

edited 3D NOESY-HSQC (in a sample containing  $^{13}\text{C}$ -enriched  $\text{CikA}_{\text{PsR}}$  with unlabeled  $\text{KaiB}_{\text{fs-nmr}}$  or  $^{13}\text{C}$ -enriched  $\text{KaiB}_{\text{fs-nmr}}$  with unlabeled  $\text{CikA}_{\text{PsR}}$ ),  $^{15}\text{N}$ -edited 3D NOESY-HSQC (in a sample containing  $^{15}\text{N}$ -enriched  $\text{CikA}_{\text{PsR}}$  with unlabeled  $\text{KaiB}_{\text{fs-nmr}}$  or  $^{15}\text{N}$ -enriched  $\text{KaiB}_{\text{fs-nmr}}$  with unlabeled  $\text{CikA}_{\text{PsR}}$ ), and 2D  $^{15}\text{N}$  HSQC-IPAP (in a sample containing  $^{15}\text{N}$ -enriched  $\text{CikA}_{\text{PsR}}$  with unlabeled  $\text{KaiB}_{\text{fs-nmr}}$  or  $^{15}\text{N}$ -enriched  $\text{KaiB}_{\text{fs-nmr}}$  with unlabeled  $\text{CikA}_{\text{PsR}}$ ). All NMR samples included 1x complete Mini Protease Inhibitor (Roche). Intermolecular NOE distance restraints for the binary complex were collected by:  $^{15}\text{N}$ ,  $^{13}\text{C}$ -edited 4D NOESY-HSQC (in a sample containing  $^{15}\text{N}$ -enriched  $\text{CikA}_{\text{PsR}}$  with  $^{13}\text{C}$ -enriched  $\text{KaiB}_{\text{fs-nmr}}$  or  $^{15}\text{N}$ -enriched  $\text{KaiB}_{\text{fs-nmr}}$  with  $^{13}\text{C}$ -enriched  $\text{CikA}_{\text{PsR}}$ ), and  $^{13}\text{C}$ -edited,  $^{12}\text{C}$ -filtered 3D NOESY-HSQC (in a sample containing  $^{13}\text{C}$ -enriched  $\text{CikA}_{\text{PsR}}$  with unlabeled  $\text{KaiB}_{\text{fs-nmr}}$  or  $^{13}\text{C}$  enriched  $\text{KaiB}_{\text{fs-nmr}}$  with unlabeled  $\text{CikA}_{\text{PsR}}$ ). Methyl-TROSY NMR experiments (72, 73) were performed as previously described (27). Please see table S1 for full details.

The equations used to calculate  $\Delta\delta$  is given below (74):

$$\Delta\delta = \sqrt{\frac{1}{2}[\Delta H^2 + (\alpha \times \Delta C^2)]} \quad (1)$$

$$\alpha = \frac{\text{Range of H}}{\text{Range of C}} = 0.231165207 \quad (2)$$

where H and C are chemical shifts of proton and  $^{13}\text{C}$  carbon, respectively.

#### Residual dipolar coupling

Samples of free  $\text{CikA}_{\text{PsR}}$  and  $\text{KaiB}_{\text{fs-nmr}}$  were separately soaked in 5.16% stretched polyacrylamide gels made with 6 mm diameter chamber (New Era NMR), and samples of the  $\text{CikA}_{\text{PsR}}$ - $\text{KaiB}_{\text{fs-nmr}}$  complex were soaked in 5.5% stretched polyacrylamide gels made with 5 mm diameter chamber (New Era NMR). The protocol for making an alignment gel has been described previously (75). Please see table S1 for full details.

#### NMR structure determination

Dihedral angles were predicted from backbone chemical shifts using TALOS-N (<http://spin.niddk.nih.gov/bax/software/TALOS-N>). Cis-prolines were predicted using Promega (<http://spin.niddk.nih.gov/bax/software/PROMEGA>). Modified from Cornilescu et al. (76), the range of intramolecular distance restraints were converted from a continuous distribution of assigned NOESY peak intensities, with a uniform 40% distance error for free  $\text{CikA}_{\text{PsR}}$  and  $\text{KaiB}_{\text{fs-nmr}}$  and 50% distance error for the  $\text{CikA}_{\text{PsR}}$ - $\text{KaiB}_{\text{fs-nmr}}$  complex, to account for spin diffusion. Intermolecular NOE distance restraints were classified as strong, medium and weak (77). Distance restraints involving methyl groups were given an additional 0.5 Å for the upper bound. Structures were calculated with XPLOR-NIH (78) following protocols from Tian et al. (79). RDC refinements followed Chou et al. (80), except for the last stage, when the force constant for the dihedral potential was set to 200 instead of 50 kcal mol<sup>-1</sup> rad<sup>-2</sup>. Structure validation statistics were generated by Molprobity (81) and DC (Restrained Fit of Dipolar Couplings to a PDB Structure Using Non-Linear Least-Squares)

(<http://spin.niddk.nih.gov/bax/nmrserver/dc/fit.html>). Structure refinement statistics are in table S3. Protein-protein interfaces were analyzed with PDBePISA (64) ([http://www.ebi.ac.uk/pdbe/prot\\_int/pistart.html](http://www.ebi.ac.uk/pdbe/prot_int/pistart.html)). Structural figures were made with UCSF Chimera software (65).

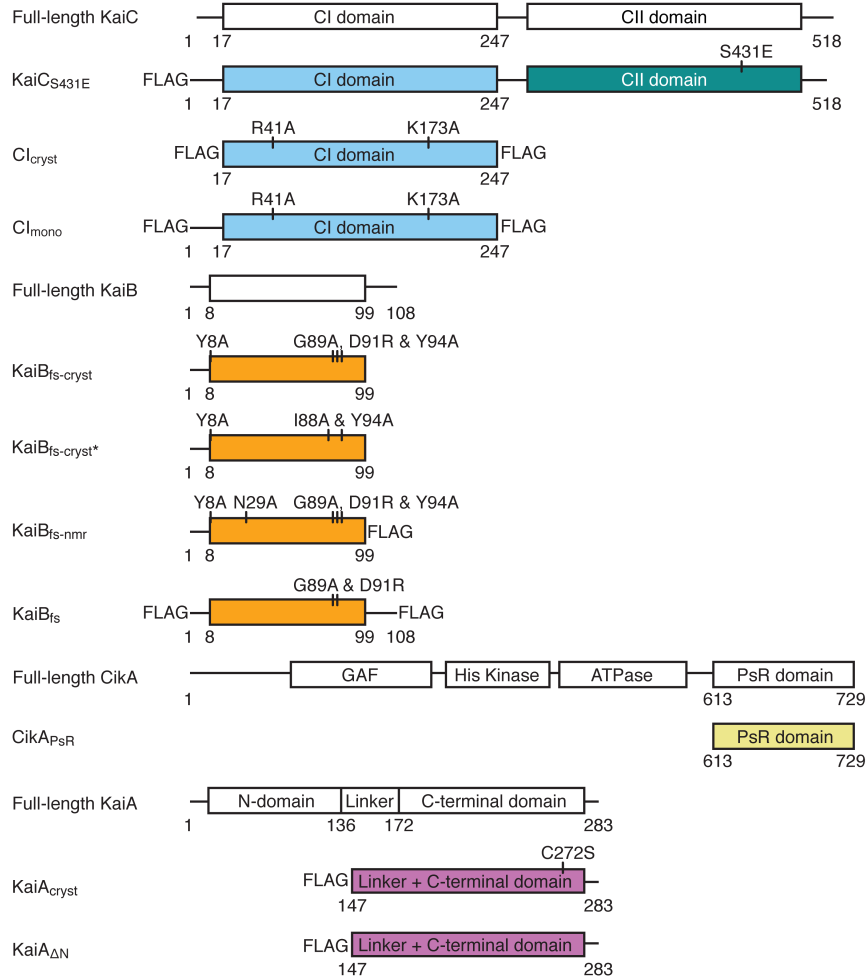

**Fig. S1. Minimal constructs of *Thermosynechococcus elongatus* proteins.**

Clock protein constructs from *Thermosynechococcus elongatus* BP-1 used in this study (not drawn to scale). Please see table S1 for additional construct details.

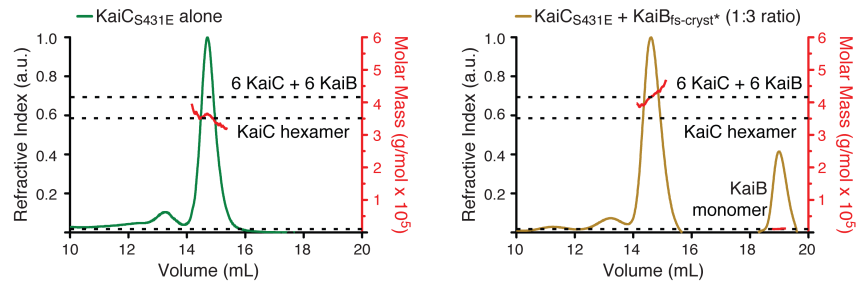

| protein                                                  | MW (kDa)   |              |                        |
|----------------------------------------------------------|------------|--------------|------------------------|
|                                                          | calculated | experimental | polydispersity (Mw/Mn) |
| KaiCS <sub>431E</sub> hexamer                            | 351        | 361.2 ± 0.5% | 1.003 ± 0.75%          |
| KaiB <sub>fs-cryst*</sub>                                | 11         | 11.3 ± 14.7% | 1.003 ± 20.93%         |
| KaiB <sub>fs-cryst*</sub> -KaiCS <sub>431E</sub> complex | 416 (6:6)  | 423.8 ± 0.3% | 1.006 ± 0.48%          |

**Fig. S2. Stoichiometry of the KaiB<sub>fs-cryst\*</sub>-KaiCS<sub>431E</sub> complex.**

Size-exclusion chromatography and multi-angle light scattering (SEC-MALS) analyses of molecular masses of complexes containing KaiCS<sub>431E</sub> alone (green) or KaiCS<sub>431E</sub>+KaiB<sub>fs-cryst\*</sub> (brown). Calculated and experimental values for molecular weights are given below. Please see fig. S1 and table S1 for construct details.

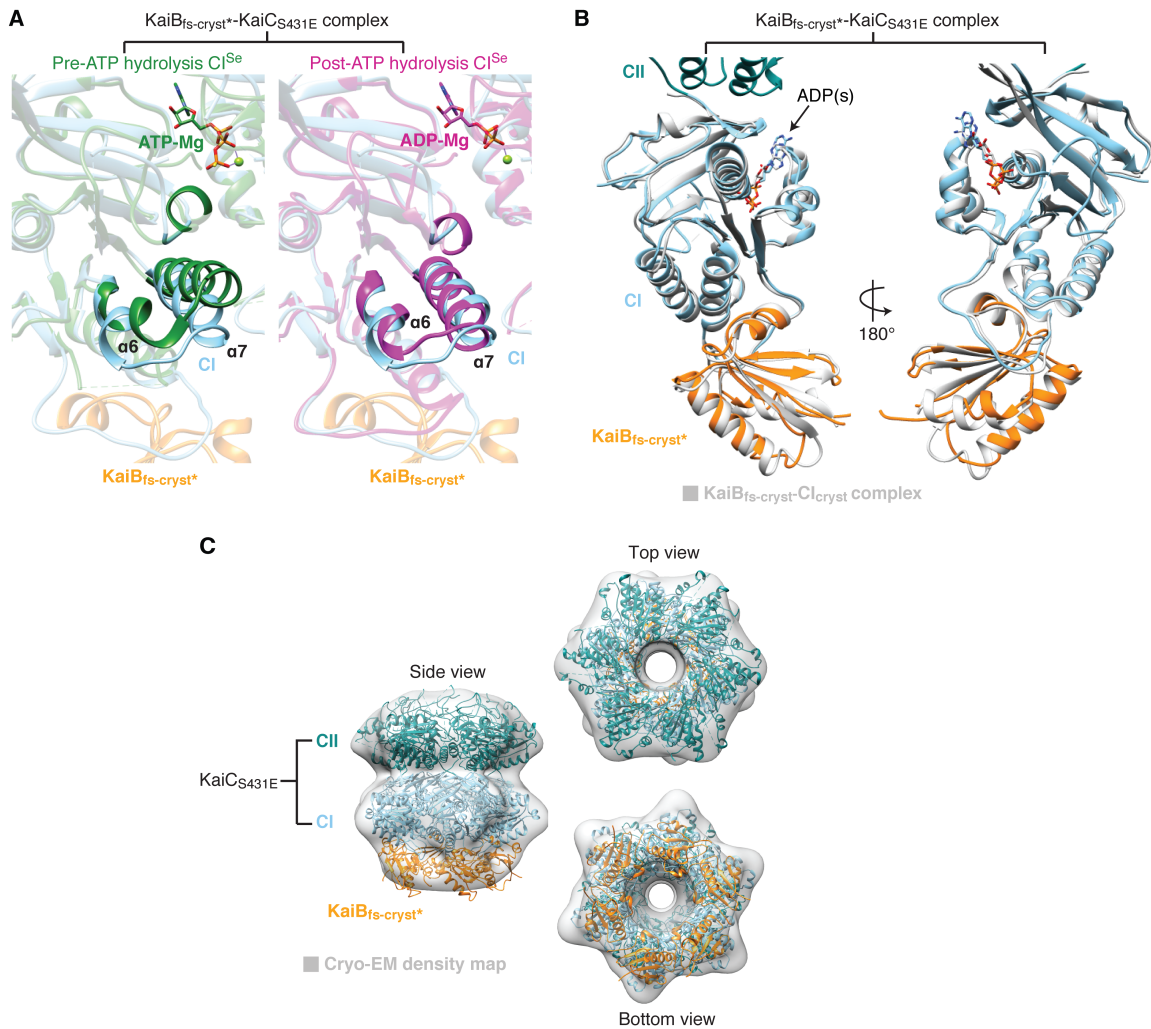

**Fig. S3. Analysis of the KaiB<sub>fs-cryst\*</sub>-KaiC<sub>S431E</sub> complex.**

(A) Superposition of the KaiB<sub>fs-cryst\*</sub>-KaiC<sub>S431E</sub> complex to the pre-ATP hydrolysis state of CI<sup>Se</sup> (dark green) (PDB 4TLC, subunit C) and post-ATP hydrolysis state of CI<sup>Se</sup> (magenta) (PDB 4TLA, subunit E). Orange, KaiB<sub>fs-cryst\*</sub>; sky-blue, KaiC<sub>S431E</sub> CI domain.

(B) Superposition of the KaiB<sub>fs-cryst</sub>-CI<sub>cryst</sub> complex to the KaiB<sub>fs-cryst\*</sub>-KaiC<sub>S431E</sub> structure. Orange, KaiB<sub>fs-cryst\*</sub>; sky-blue, KaiC<sub>S431E</sub> CI domain; dark cyan, KaiC<sub>S431E</sub> CII domain; gray, KaiB<sub>fs-cryst</sub>-CI<sub>cryst</sub> complex.

(C) Fitting the hexameric KaiB<sub>fs-cryst\*</sub>-KaiC<sub>S431E</sub> complex to the 16 Å resolution cryo-EM density map of a KaiB-KaiC complex made with native KaiB (51) (EMD-5672). Please see fig. S1 and table S1 for construct details.

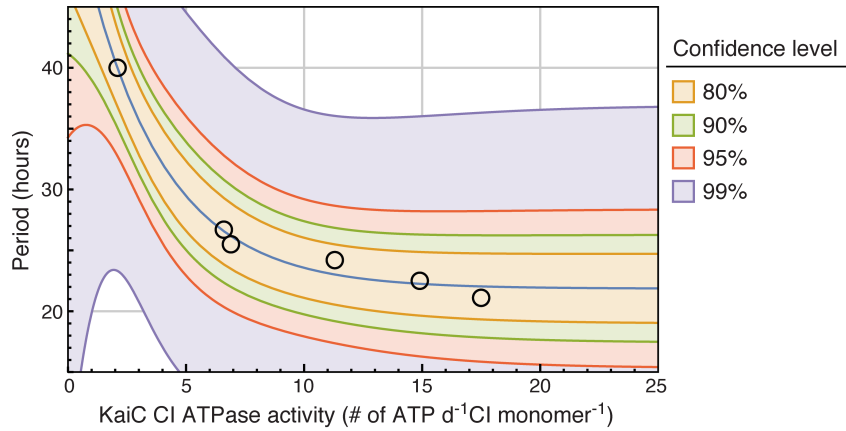

**Fig. S4. Analysis of CI ATPase activity versus clock period data in Figure 1G of the paper by Abe et al. *Science* (2015) 349: 312-316.**

Exponential fit (blue line) of CI ATPase activity versus clock period data in Figure 1G of the paper by Abe et al. *Science* (2015) 349: 312-316. Predicted confidence levels of the fit by Mathematica (Wolfram) are 80% (yellow), 90% (green), 95% (red), and 99% (purple). The fit predicts a lower limit of ~21.9 hours for clock period, irrespective of CI ATPase activity, assuming wild-type CII activity.

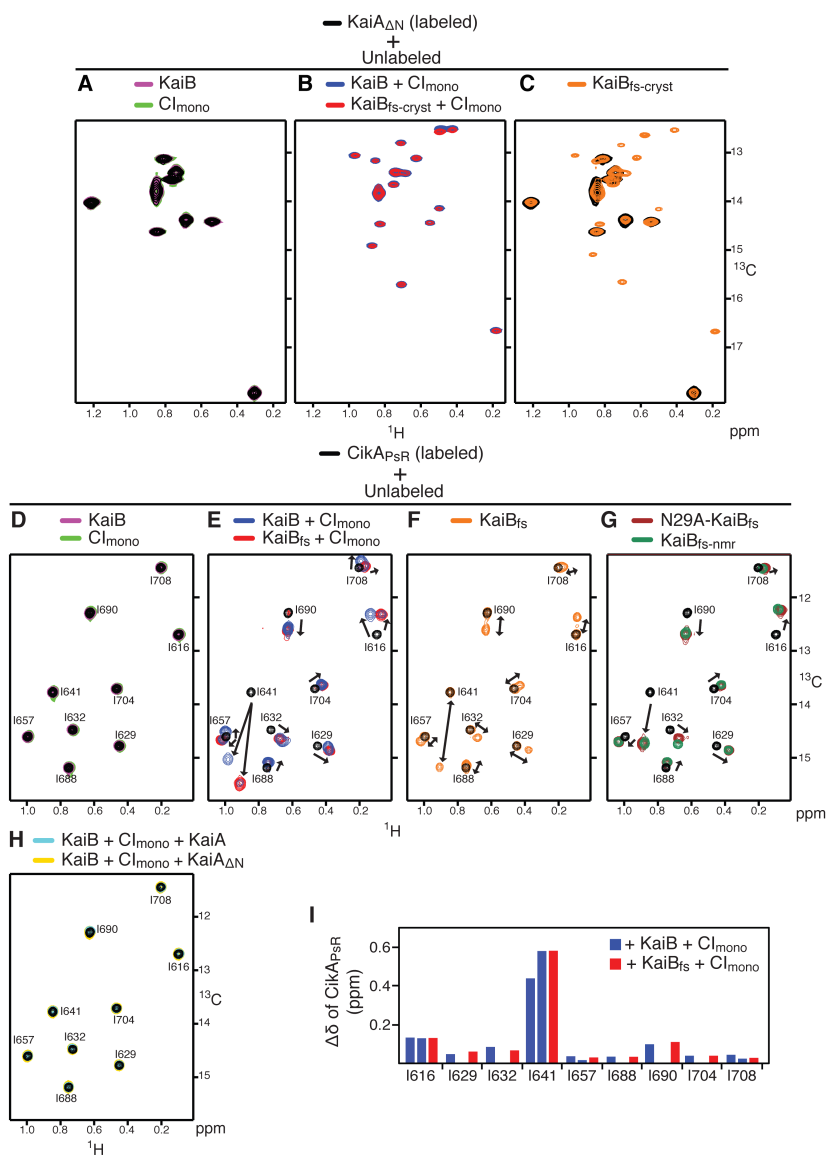

**Fig. S5. NMR of KaiA $\Delta$ N-KaiB<sub>fs-cryst</sub>-CImono and CikA<sub>PsR</sub>-KaiB<sub>fs</sub>-CImono interactions.** (A) Methyl-TROSY spectra of U-[<sup>15</sup>N, <sup>2</sup>H]-Ile- $\delta$ 1-[<sup>13</sup>C, <sup>1</sup>H]-labeled KaiA $\Delta$ N alone (black), or in the presence of wild-type KaiB (magenta), or CImono (green); or (B) in the presence of KaiB+CImono (blue) or KaiB<sub>fs-cryst</sub>+CImono (red); or (C) in the presence of KaiB<sub>fs-cryst</sub> (orange). (D) Assigned methyl-TROSY spectra of U-[<sup>15</sup>N, <sup>2</sup>H]-Ile- $\delta$ 1-[<sup>13</sup>C, <sup>1</sup>H]-labeled CikA<sub>PsR</sub> alone (black), or in the presence of wild-type KaiB (magenta) or CImono (green); or (E) in the presence of KaiB+CImono (blue), or KaiB<sub>fs</sub>+CImono (red); or (F) in the presence of KaiB<sub>fs</sub> (orange); or (G) in the presence of N29A-KaiB<sub>fs</sub> (brown), or KaiB<sub>fs-nmr</sub> (dark green); or (H) in the presence of KaiB+CImono+KaiA (cyan), or KaiB+CImono+KaiA $\Delta$ N (yellow). (I) Perturbation of CikA<sub>PsR</sub> <sup>1</sup>H, <sup>13</sup>C chemical shifts by KaiB+CImono (blue) or KaiB<sub>fs</sub>+CImono (red). Two blue bars for I616, I641, I657, and I708 represent two different conformations. Please see fig. S1 and table S1 for construct details.



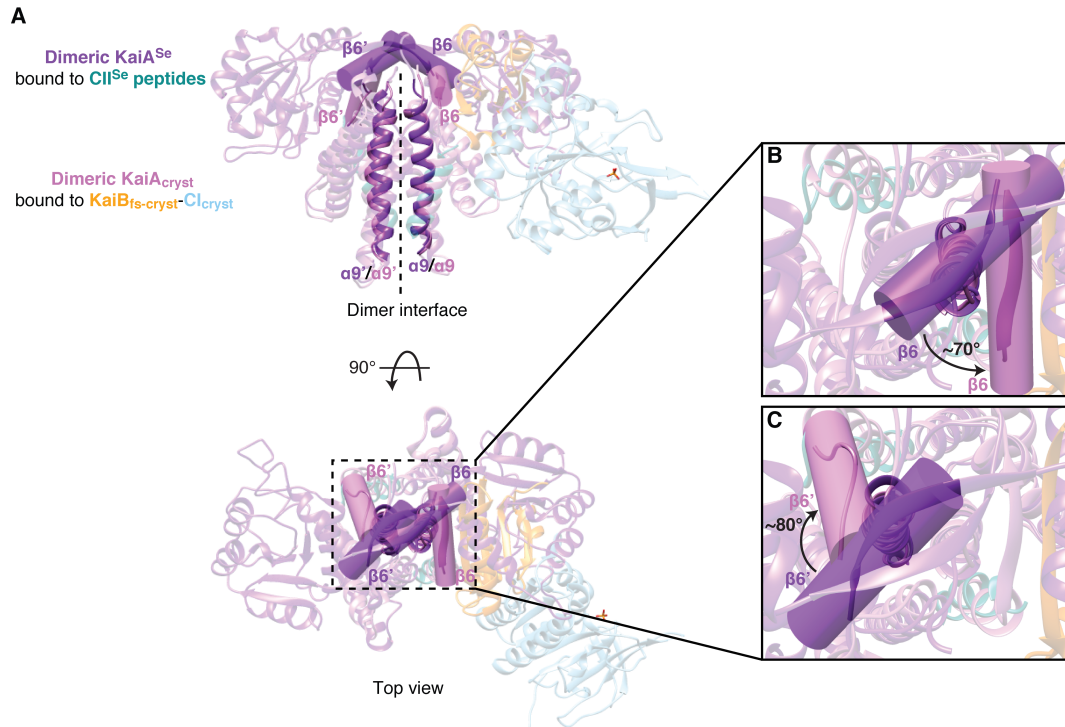

**Fig. S6. Rotations of KaiA<sub>cryst</sub>  $\beta 6$  strands in the KaiA<sub>cryst</sub>-KaiB<sub>fs-cryst</sub>-CI<sub>cryst</sub> complex.**  
**(A)** Superposition of KaiA<sup>Se</sup> (purple) crystal structure (PDB 5C5E) and KaiA<sub>cryst</sub> (orchid) in complex with KaiB<sub>fs-cryst</sub> and CI<sub>cryst</sub>. Prime symbols denote the other protomer within the KaiA dimer. Top view is shown below. Ribbons are shown in transparent mode, except for strand  $\beta 6$  and helix  $\alpha 9$ . **(B)** Zoomed-in view of the boxed region in (A). Only one set of  $\beta 6$  strands is shown. **(C)** Zoomed-in view of the boxed region in (A). The other set of  $\beta 6$  strands is shown. Angles are calculated from cylindrical axes using residues 167-172 in KaiA<sup>Se</sup> and residues 166-171 in KaiA<sub>cryst</sub>. Please see fig. S1 and table S1 for construct details.

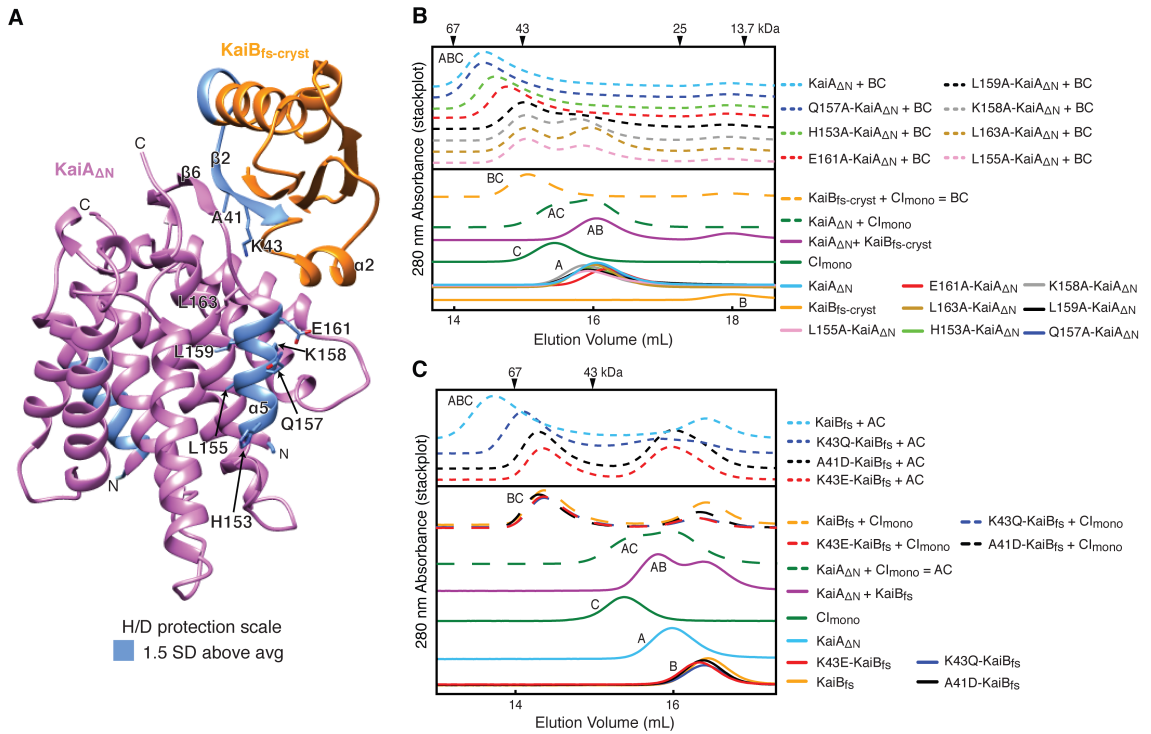

**Fig. S7. HDX-MS and mutagenesis of KaiA<sub>ΔN</sub>-KaiB<sub>fs-cryst</sub> interface.**

(A) Protection against hydrogen-deuterium exchange upon formation of the KaiA<sub>ΔN</sub>-KaiB<sub>fs-cryst</sub>-C<sub>lcryst</sub> complex, as measured by HDX-MS. Blue, protection 1.5 SD above average protection. (B) Size-exclusion chromatography of Kai protein complex formation. Bottom panel, KaiA<sub>ΔN</sub> mutants and control samples: KaiA<sub>ΔN</sub> (sky blue), H153A-KaiA<sub>ΔN</sub> (green), L155A-KaiA<sub>ΔN</sub> (pink), Q157A-KaiA<sub>ΔN</sub> (blue), K158A-KaiA<sub>ΔN</sub> (gray), L159A-KaiA<sub>ΔN</sub> (black), E161A-KaiA<sub>ΔN</sub> (red), L163A-KaiA<sub>ΔN</sub> (coffee), KaiB<sub>fs-cryst</sub> (orange), C<sub>lmono</sub> (dark green), KaiA<sub>ΔN</sub>+KaiB<sub>fs-cryst</sub> (purple, long dash), and KaiB<sub>fs-cryst</sub>+C<sub>lmono</sub> (orange, long dash). The label BC represents KaiB<sub>fs-cryst</sub>+C<sub>lmono</sub> (top panel). Top panel, ternary mixtures: KaiA<sub>ΔN</sub>+BC (sky blue, short dash), H153A-KaiA<sub>ΔN</sub>+BC (green, short dash), L155A-KaiA<sub>ΔN</sub>+BC (pink, short dash), Q157A-KaiA<sub>ΔN</sub>+BC (blue, short dash), K158A-KaiA<sub>ΔN</sub>+BC (gray, short dash), L159A-KaiA<sub>ΔN</sub>+BC (black, short dash), E161A-KaiA<sub>ΔN</sub>+BC (red, short dash), and L163A-KaiA<sub>ΔN</sub>+BC (coffee, short dash). (C) Size-exclusion chromatography of Kai protein complex formation. Bottom panel, KaiB<sub>fs</sub> mutants and control samples: KaiA<sub>ΔN</sub> (sky blue), KaiB<sub>fs</sub> (orange), A41D-KaiB<sub>fs</sub> (black), K43E-KaiB<sub>fs</sub> (red), K43Q-KaiB<sub>fs</sub> (blue), C<sub>lmono</sub> (dark green), KaiA<sub>ΔN</sub>+KaiB<sub>fs</sub> (purple), KaiB<sub>fs</sub>+C<sub>lmono</sub> (orange, long dash), A41D-KaiB<sub>fs</sub>+C<sub>lmono</sub> (black, long dash), K43E-KaiB<sub>fs</sub>+C<sub>lmono</sub> (red, long dash), K43Q-KaiB<sub>fs</sub>+C<sub>lmono</sub> (blue, long dash), and KaiA<sub>ΔN</sub>+C<sub>lmono</sub> (dark green, long dash). The label AC represents KaiA<sub>ΔN</sub>+C<sub>lmono</sub> (top panel). Ternary mixtures (top panel): KaiB<sub>fs</sub>+AC (sky blue, short dash), A41D-KaiB<sub>fs</sub>+AC (black, short dash), K43E-KaiB<sub>fs</sub>+AC (red, short dash), and K43Q-KaiB<sub>fs</sub>+AC (blue, short dash). Molecular weight markers (inverted triangles) are indicated along the top of the chromatograms. Please see fig. S1 and table S1 for construct details.

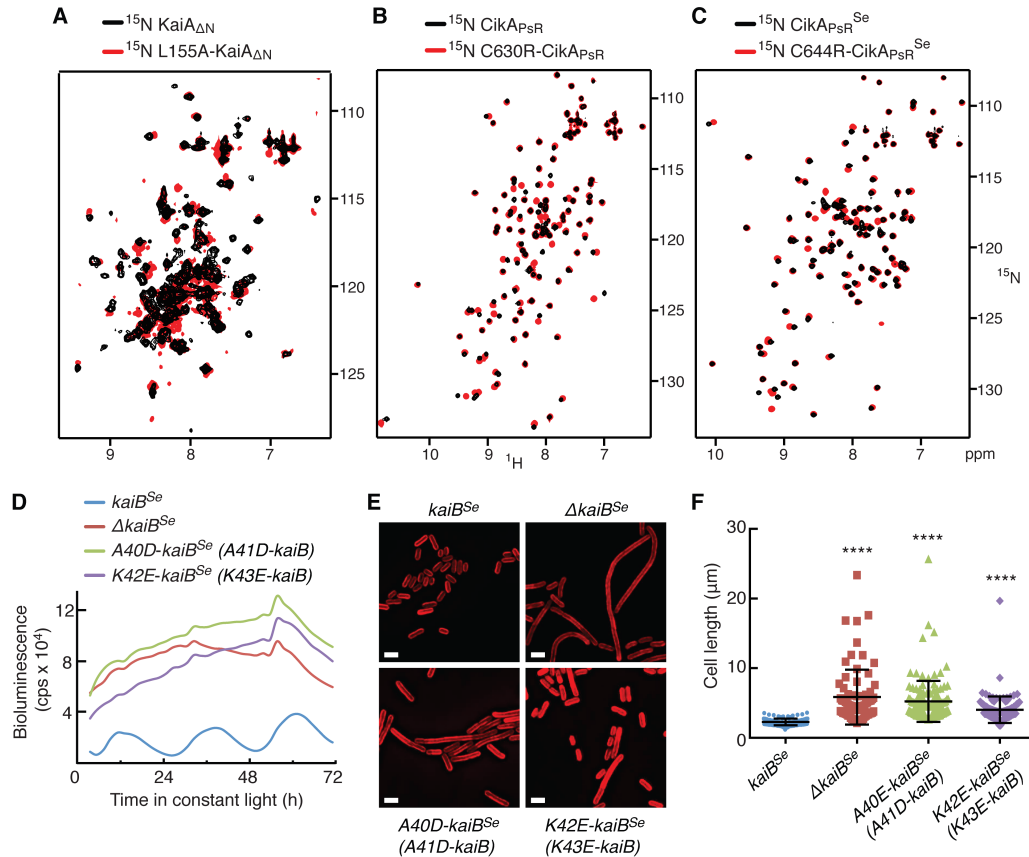

**Fig. S8. NMR and *in vivo* experiments of KaiA, KaiB, and CikA<sub>PsR</sub> mutants.**

(A) Overlay of  $^{15}\text{N}$ ,  $^1\text{H}$ -HSQC spectra of U- $^{15}\text{N}$ ,  $^1\text{H}$ -labeled KaiA $_{\Delta\text{N}}$  (black) and L155A-KaiA $_{\Delta\text{N}}$  (red). (B) Overlay of  $^{15}\text{N}$ ,  $^1\text{H}$ -HSQC spectra of U- $^{15}\text{N}$ ,  $^1\text{H}$ -labeled CikA $_{\text{PsR}}$  (black) and C630R-CikA $_{\text{PsR}}$  (red). (C) Overlay of  $^{15}\text{N}$ ,  $^1\text{H}$ -HSQC spectra of U- $^{15}\text{N}$ ,  $^1\text{H}$ -labeled CikA $_{\text{PsR}}^{\text{Se}}$  (black) and C644R-CikA $_{\text{PsR}}^{\text{Se}}$  (red). C630R and C644R are analogous mutations of CikA $_{\text{PsR}}$  and CikA $_{\text{PsR}}^{\text{Se}}$ , respectively. (D) Bioluminescence rhythms from *kaiB* $^{\text{Se}}$ -knockout *S. elongatus* strains transformed with *kaiB* $^{\text{Se}}$  (blue), *A40D-kaiB* $^{\text{Se}}$  (green), *k42E-kaiB* $^{\text{Se}}$  (purple), or nothing (red). In (D to F), A40D and K42E in *kaiB* $^{\text{Se}}$  are analogous to A41D and K43E in *kaiB*, respectively. (E) Representative micrographs of cells harboring *kaiB* $^{\text{Se}}$ , *A40D-kaiB* $^{\text{Se}}$ , *K42E-kaiB* $^{\text{Se}}$ , or lacking any *kaiB* $^{\text{Se}}$  gene. Red: membrane autofluorescence. Scale bars: 2.5  $\mu\text{m}$ . (F) Scatterplots of cell lengths from strains expressing complemented *kaiB* $^{\text{Se}}$  (blue,  $n=150$ ), *A40D-kaiB* $^{\text{Se}}$  (green,  $n=125$ ), *K42E-kaiB* $^{\text{Se}}$  (purple,  $n=112$ ), or lacking *kaiB* $^{\text{Se}}$  (red,  $n=76$ ). One-way ANOVA of  $\log_{10}$ -transformed cell length data produced  $P < 0.0001$ . \*\*\*\* denotes Bonferroni-corrected  $p$  values ( $< 0.0001$ ) for pairwise comparisons to *kaiB* $^{\text{Se}}$  ( $\alpha=0.05$ ). Please see fig. S1 and table S1 for construct details.

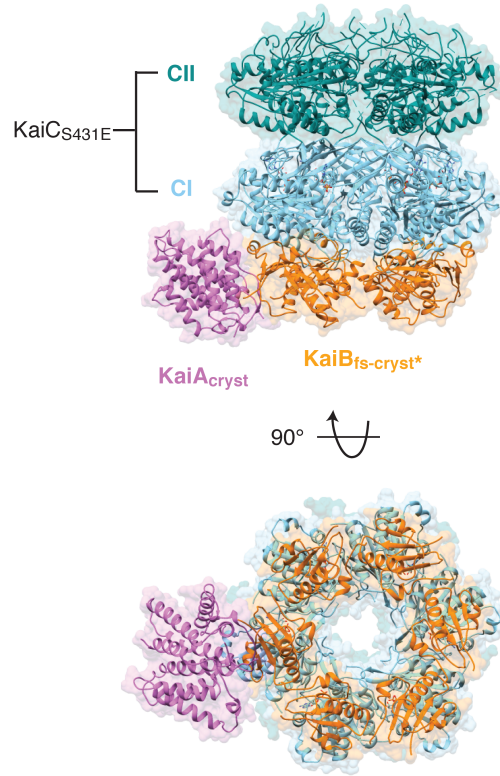

**Fig. S9. Superposition of the KaiA<sub>cryst</sub>-KaiB<sub>fs-cryst</sub>-CI<sub>cryst</sub> complex onto the KaiB<sub>fs-cryst</sub>\*-KaiC<sub>S431E</sub> hexamer.**

Superposition of the KaiA<sub>cryst</sub>-KaiB<sub>fs-cryst</sub>-CI<sub>cryst</sub> complex from Fig. 4A with that of the KaiB<sub>fs-cryst</sub>\*-KaiC<sub>S431E</sub> hexamer from Fig. 3A.

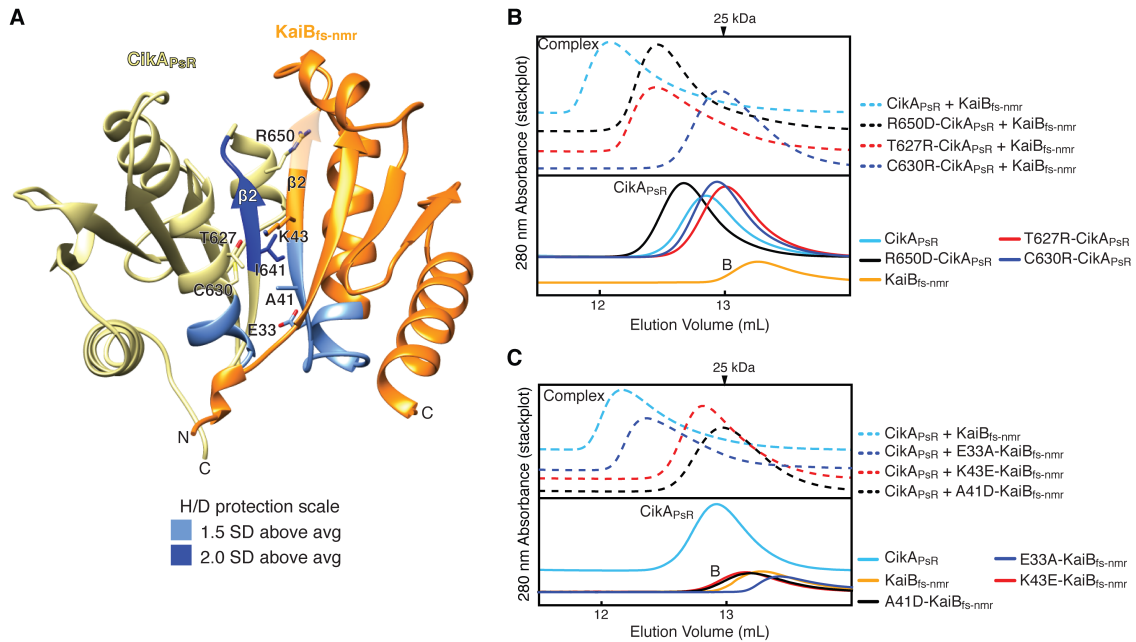

**Fig. S10. HDX-MS and mutagenesis of the  $CikA_{P_{S}R}$ - $KaiB_{fs-nmr}$  complex.**

(A) Protection against hydrogen-deuterium exchange upon formation of the  $CikA_{P_{S}R}$ - $KaiB_{fs-nmr}$  complex, as measured by HDX-MS. blue and dark blue, protection 1.5 and 2.0 SD, respectively, above average protection. (B) Size-exclusion chromatography of  $CikA_{P_{S}R}$ - $KaiB_{fs-nmr}$  complex formation. Bottom panel,  $CikA_{P_{S}R}$  mutants and control samples:  $CikA_{P_{S}R}$  (sky blue), T627R- $CikA_{P_{S}R}$  (red), C630R- $CikA_{P_{S}R}$  (blue), R650D- $CikA_{P_{S}R}$  (black) and  $KaiB_{fs-nmr}$  (orange). Top panel, binary mixtures:  $CikA_{P_{S}R}$ + $KaiB_{fs-nmr}$  (sky-blue, dash), T627R- $CikA_{P_{S}R}$ + $KaiB_{fs-nmr}$  (red, dash), C630R- $CikA_{P_{S}R}$ + $KaiB_{fs-nmr}$  (blue, dash), and R650D- $CikA_{P_{S}R}$ + $KaiB_{fs-nmr}$  (black, dash). (C) Size-exclusion chromatography of  $CikA_{P_{S}R}$ - $KaiB_{fs-nmr}$  complex formation. Bottom panel,  $KaiB$  mutants and control samples:  $CikA_{P_{S}R}$  (sky blue),  $KaiB_{fs-nmr}$  (orange), E33A- $KaiB_{fs-nmr}$  (blue), A41D- $KaiB_{fs-nmr}$  (black), and K43E- $KaiB_{fs-nmr}$  (red). Top panel, binary mixtures:  $CikA_{P_{S}R}$ + $KaiB_{fs-nmr}$  (sky-blue, dash),  $CikA_{P_{S}R}$ +E33A- $KaiB_{fs-nmr}$  (blue, dash),  $CikA_{P_{S}R}$ +A41D- $KaiB_{fs-nmr}$  (black, long dash), and  $CikA_{P_{S}R}$ +K43E- $KaiB_{fs-nmr}$  (red, dash). Molecular weight markers (inverted triangles) are indicated along the top of the chromatograms. Please see fig. S1 and table S1 for construct details.

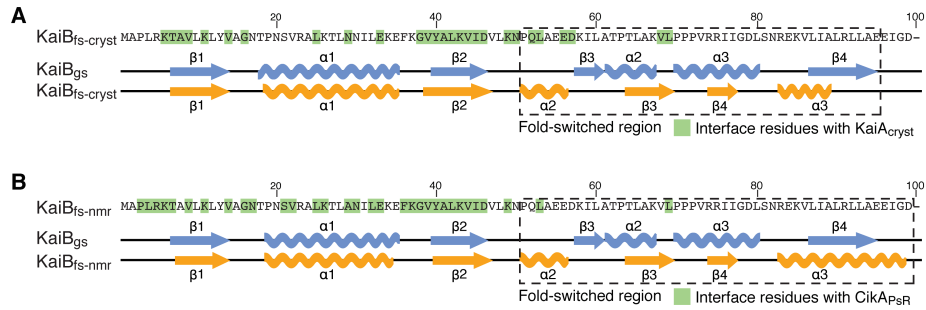

**Fig. S11. Interacting residues of KaiB to KaiA<sub>cryst</sub> and CikA<sub>P<sub>s</sub>R}</sub>.**

(A) Secondary structures of KaiB<sub>gs</sub> (PDB 2QKE, subunit A) and KaiB<sub>fs-cryst</sub> bound to C<sub>I</sub><sub>cryst</sub> and KaiA<sub>cryst</sub>. Residues of KaiB<sub>fs-cryst</sub> that interact with KaiA<sub>cryst</sub> are highlighted in green. (B) Secondary structures of KaiB<sub>gs</sub> (PDB 2QKE, subunit A) and KaiB<sub>fs-nmr</sub> bound to C<sub>ikA</sub><sub>P<sub>s</sub>R}</sub>. Residues of KaiB<sub>fs-nmr</sub> that interact with C<sub>ikA</sub><sub>P<sub>s</sub>R}</sub> are highlighted in green.

**Table S1. Abbreviation and full name of proteins used in each experimental condition.**

| Experiment Type                                                                                                                                                                                                                                                                                                                                                                                                                                                  | [Abbreviation]-Protein Full Name (N-terminal Tag_Protein_Mutation_Length of Protein_C-terminal Tag) / Final Concentration ( $\mu\text{M}$ if not indicated)                                                                                                     | Experimental Condition                                                                                                                                                                                                                                                                                                                                                              |
|------------------------------------------------------------------------------------------------------------------------------------------------------------------------------------------------------------------------------------------------------------------------------------------------------------------------------------------------------------------------------------------------------------------------------------------------------------------|-----------------------------------------------------------------------------------------------------------------------------------------------------------------------------------------------------------------------------------------------------------------|-------------------------------------------------------------------------------------------------------------------------------------------------------------------------------------------------------------------------------------------------------------------------------------------------------------------------------------------------------------------------------------|
| Crystallization for KaiB <sub>fs-cryst</sub> -CI <sub>cryst</sub> complex (Fig. 2)                                                                                                                                                                                                                                                                                                                                                                               | 1) [CI <sub>cryst</sub> ]-FLAG_KaiC_R41A-K173A_17-247_FLAG / ~20 mg/mL<br>2) [KaiB <sub>fs-cryst</sub> ]-KaiB_Y8A_Y94A_G89A_D91R_1-99 / ~20 mg/mL                                                                                                               | <ul style="list-style-type: none"> <li>• Temperature: 22 °C</li> <li>• Crystallization buffer: 0.2 M potassium acetate, 10% (w/v) PEG3350, and 2.5% glycerol</li> <li>• Proteins stored in 20 mM Tris, 50 mM NaCl, 1 mM MgCl<sub>2</sub>, 1 mM ADP, pH 7.0</li> </ul>                                                                                                               |
| Crystallization for KaiB <sub>fs-cryst*</sub> -KaiC <sub>S431E</sub> complex (Fig. 3)                                                                                                                                                                                                                                                                                                                                                                            | 1) [KaiC <sub>S431E</sub> ]- FLAG_KaiC_S431E_1-518 / ~12.5 mg/mL<br>2) [KaiB <sub>fs-cryst*</sub> ]-KaiB_Y8A_Y94A_I88A_1-99 / ~12.5 mg/mL                                                                                                                       | <ul style="list-style-type: none"> <li>• Temperature: 22 °C</li> <li>• Crystallization buffer: 0.1 M sodium citrate pH 5.75 and 22% PEG3000</li> <li>• KaiC<sub>S431E</sub> stored in 20mM Tris, 150mM NaCl, 5mM DTT, 1mM ATP, 1mM MgCl<sub>2</sub>, 5% glycerol pH 7.0</li> <li>• KaiB<sub>fs-cryst*</sub> stored in 20mM Tris, 150mM NaCl, 5mM DTT, 5% glycerol pH 7.0</li> </ul> |
| Crystallization for KaiA <sub>cryst</sub> -KaiB <sub>fs-cryst</sub> -CI <sub>cryst</sub> Complex (Fig. 4)                                                                                                                                                                                                                                                                                                                                                        | 1) [CI <sub>cryst</sub> ]-FLAG_KaiC_R41A-K173A_17-247_FLAG / ~25 mg/mL<br>2) [KaiB <sub>fs-cryst</sub> ]-KaiB_Y8A-Y94A-G89A-D91R_1-99 / ~25 mg/mL<br>3) [KaiA <sub>cryst</sub> ]-FLAG_KaiA_C272S_147-283 / ~25 mg/mL                                            | <ul style="list-style-type: none"> <li>• Temperature: 22 °C</li> <li>• Crystallization buffer: 0.15 M ammonium sulfate, 0.1 M Tris pH 7.0, and 10% PEG 4000</li> <li>• Proteins stored in 20 mM Tris, 50 mM NaCl, 1 mM MgCl<sub>2</sub>, 1 mM ADP, pH 7.0</li> </ul>                                                                                                                |
| SEC-MALS of KaiB <sub>fs-cryst*</sub> -KaiC <sub>S431E</sub> complex (fig. S2)                                                                                                                                                                                                                                                                                                                                                                                   | 1) [KaiC <sub>S431E</sub> ]-FLAG_KaiC_S431E_1-518 / 30<br>2) [KaiB <sub>fs-cryst*</sub> ]-KaiB_Y8A_Y94A_I88A_1-99 / 90                                                                                                                                          | <ul style="list-style-type: none"> <li>• Volume: 200 <math>\mu\text{L}</math></li> <li>• Pre-experiment incubation time of mixture: overnight</li> <li>• Buffer: 20 mM Tris, 150 mM NaCl, 5 mM DTT, 0.5 mM MgCl<sub>2</sub>, 0.5 mM ATP, pH 7.0</li> <li>• Temperature: 4 °C</li> </ul>                                                                                             |
| Fluorescence Spectroscopy for CII peptides (Fig. 4D)                                                                                                                                                                                                                                                                                                                                                                                                             | 1) [CII peptides]-Cystine_KaiC_488-518 (6-IAF-labeled) / 0.05<br>2) [KaiA]-KaiA_1-283 / 10<br>3) [CI <sub>cryst</sub> ]-FLAG_KaiC_R41A-K173A_17-247_FLAG / 5, 10, 15, 20, 30<br>4) [KaiB <sub>fs-cryst</sub> ]-KaiB_Y8A-Y94A-G89A-D91R_1-99 / 5, 10, 15, 20, 30 | <ul style="list-style-type: none"> <li>• Volume: 350 <math>\mu\text{L}</math></li> <li>• Pre-experiment incubation time of mixture: 5 mins</li> <li>• Temperature: 25 °C</li> <li>• Buffer: 20 mM Tris, 50 mM NaCl, 0.2% NaN<sub>3</sub>, pH 7.0</li> </ul>                                                                                                                         |
| HDX-MS for KaiA <sub>ΔN</sub> -KaiB <sub>fs-cryst</sub> -CI <sub>cryst</sub> complex (fig. S7A)<br><br>Mixture ratio of KaiA <sub>ΔN</sub> : KaiB <sub>fs-cryst</sub> :CI <sub>cryst</sub> for probing KaiA <sub>ΔN</sub> free and bound is 1.0:1.2:1.44<br><br>Mixture ratio of KaiA <sub>ΔN</sub> : KaiB <sub>fs-cryst</sub> :CI <sub>cryst</sub> for probing KaiB <sub>fs-cryst</sub> -CI <sub>cryst</sub> with and without KaiA <sub>ΔN</sub> is 1.2:1.0:1.2 | 1) [KaiA <sub>ΔN</sub> ]-FLAG_KaiA_147-283 / 49.3, 69.3<br>2) [KaiB <sub>fs-cryst</sub> -FLAG]-KaiB_Y8A_Y94A_G89A_D91R_1-99_FLAG / 60, 56.6<br>3) [CI <sub>cryst</sub> ]-FLAG_KaiC_R41A-K173A_17-247_FLAG / 72, 68                                              | <ul style="list-style-type: none"> <li>• Volume: 60 <math>\mu\text{L}</math></li> <li>• Buffer: 10 mM Tris, 100 mM NaCl, pH 7.2</li> <li>• Quenching buffer: 3.2M GuHCl</li> <li>• Exchange time points: 10s, 100s and 1000s</li> </ul>                                                                                                                                             |

|                                                                                                                                                                                                                                                                                                                                         |                                                                                                                                                                                                                                                                                                                                                                                                                                                                                                                                                                                                                                                                                                                                    |                                                                                                                                                                                                                                                        |
|-----------------------------------------------------------------------------------------------------------------------------------------------------------------------------------------------------------------------------------------------------------------------------------------------------------------------------------------|------------------------------------------------------------------------------------------------------------------------------------------------------------------------------------------------------------------------------------------------------------------------------------------------------------------------------------------------------------------------------------------------------------------------------------------------------------------------------------------------------------------------------------------------------------------------------------------------------------------------------------------------------------------------------------------------------------------------------------|--------------------------------------------------------------------------------------------------------------------------------------------------------------------------------------------------------------------------------------------------------|
| <p>HDX-MS for CikA<sub>PsR</sub>-KaiB<sub>fs-nmr</sub> complex (fig. S10A)</p> <p>Mixture ratio of CikA<sub>PsR</sub>: KaiB<sub>fs-nmr</sub> for probing CikA<sub>PsR</sub> free and bound is 1.0:1.2</p> <p>Mixture ratio of CikA<sub>PsR</sub>: KaiB<sub>fs-nmr</sub> for probing KaiB<sub>fs-nmr</sub> free and bound is 1.2:1.0</p> | <ol style="list-style-type: none"> <li>1) [CikA<sub>PsR</sub>]-CikA_613-729 / 78, 104.6</li> <li>2) [KaiB<sub>fs-nmr</sub>]-KaiB_Y8A_Y94A_G89A_D91R_N29A_1-99_FLAG / 93.3, 84.6</li> </ol>                                                                                                                                                                                                                                                                                                                                                                                                                                                                                                                                         | <ul style="list-style-type: none"> <li>• Volume: 60 <math>\mu</math>L</li> <li>• Buffer: 10 mM Tris, 100 mM NaCl, pH 7.2</li> <li>• Quenching buffer: 1.6M GuHCl</li> <li>• Exchange time points: 10s, 100s and 1000s</li> </ul>                       |
| <p>KaiA-KaiB-CI<sub>cryst</sub> complex mutagenesis study by S200 analytical gel filtration chromatography (Fig. 4E)</p>                                                                                                                                                                                                                | <ol style="list-style-type: none"> <li>1) [KaiA]-KaiA_1-283 / 30</li> <li>2) [KaiB]-KaiB_1-108 / 30</li> <li>3) [CI<sub>cryst</sub>]-FLAG_KaiC_R41A-K173A_17-247_FLAG / 30</li> <li>4) [L155A-KaiA]-KaiA_L155A_1-283 / 30</li> <li>5) [K158A-KaiA]-KaiA_L158A_1-283 / 30</li> <li>6) [N212A-KaiA]-KaiA_N212A_1-283 / 30</li> <li>7) [D266A-KaiA]-KaiA_D266A_1-283 / 30</li> <li>8) [N212A-D266A-KaiA]-KaiA_N212A_D266A_1-283 / 30</li> </ol>                                                                                                                                                                                                                                                                                       | <ul style="list-style-type: none"> <li>• Volume: 250 <math>\mu</math>L</li> <li>• Temperature: room temperature (~22 °C)</li> <li>• Buffer: 20 mM Tris, 100 mM NaCl, pH 7.0</li> <li>• Pre-experiment incubation time for mixtures: 24 hrs.</li> </ul> |
| <p>KaiA<sub>ΔN</sub>-KaiB<sub>fs-cryst</sub>-CI<sub>mono</sub> complex mutagenesis study by S200 analytical gel filtration chromatography (fig. S7B)</p>                                                                                                                                                                                | <ol style="list-style-type: none"> <li>1) [KaiB<sub>fs-cryst</sub>]-KaiB_Y8A_Y94A_G89A_D91R_1-99 / 30</li> <li>2) [CI<sub>mono</sub>]-FLAG_KaiC_R41A-K173A_1-247_FLAG / 15</li> <li>3) [KaiA<sub>ΔN</sub>]-FLAG_KaiA_147-283 / 30</li> <li>4) [H153A-KaiA<sub>ΔN</sub>]-FLAG_KaiA_H153A_147-283 / 30</li> <li>5) [L155A-KaiA<sub>ΔN</sub>]-FLAG_KaiA_L155A_147-283 / 30</li> <li>6) [Q157A-KaiA<sub>ΔN</sub>]-FLAG_KaiA_Q157A_147-283 / 30</li> <li>7) [K158A-KaiA<sub>ΔN</sub>]-FLAG_KaiA_K158A_147-283 / 30</li> <li>8) [L159A-KaiA<sub>ΔN</sub>]-FLAG_KaiA_L159A_147-283 / 30</li> <li>9) [E161A-KaiA<sub>ΔN</sub>]-FLAG_KaiA_E161A_147-283 / 30</li> <li>10) [L163A-KaiA<sub>ΔN</sub>]-FLAG_KaiA_L163A_147-283 / 30</li> </ol> | <ul style="list-style-type: none"> <li>• Volume: 250 <math>\mu</math>L</li> <li>• Temperature: room temperature (~22 °C)</li> <li>• Buffer: 20 mM Tris, 100 mM NaCl, pH 7.0</li> </ul>                                                                 |
| <p>KaiA<sub>ΔN</sub>-KaiB<sub>fs</sub>-CI<sub>mono</sub> complex mutagenesis study by S200 analytical gel filtration chromatography (fig. S7C)</p>                                                                                                                                                                                      | <ol style="list-style-type: none"> <li>1) [KaiA<sub>ΔN</sub>]-FLAG_KaiA_147-283 / 30</li> <li>2) [CI<sub>mono</sub>]-FLAG_KaiC_R41A-K173A_1-247_FLAG / 16</li> <li>3) [KaiB<sub>fs</sub>]-FLAG_KaiB_G89A-D91R_1-108_FLAG / 30</li> <li>4) [A41D-KaiB<sub>fs</sub>]-FLAG_KaiB_G89A-D91R_A41D_1-108_FLAG / 30</li> <li>5) [K43E-KaiB<sub>fs</sub>]-FLAG_KaiB_G89A-D91R_K43E_1-108_FLAG / 30</li> <li>6) [K43Q-KaiB<sub>fs</sub>]-FLAG_KaiB_G89A-D91R_K43Q_1-108_FLAG / 30</li> </ol>                                                                                                                                                                                                                                                 | <ul style="list-style-type: none"> <li>• Volume: 250 <math>\mu</math>L</li> <li>• Temperature: room temperature (~22 °C)</li> <li>• Buffer: 20 mM Tris, 100 mM NaCl, pH 7.0</li> </ul>                                                                 |



|                                                                                                                                   |                                                                                                                                                                                                                                                                                                                                                                                                                                                                                                                                                                                                                     |                                                                                                                                                                                                                                                                                                                                                                                                                                                                                                                                                                                 |
|-----------------------------------------------------------------------------------------------------------------------------------|---------------------------------------------------------------------------------------------------------------------------------------------------------------------------------------------------------------------------------------------------------------------------------------------------------------------------------------------------------------------------------------------------------------------------------------------------------------------------------------------------------------------------------------------------------------------------------------------------------------------|---------------------------------------------------------------------------------------------------------------------------------------------------------------------------------------------------------------------------------------------------------------------------------------------------------------------------------------------------------------------------------------------------------------------------------------------------------------------------------------------------------------------------------------------------------------------------------|
| CikA <sub>PsR</sub> -KaiB <sub>fs-nmr</sub> complex mutagenesis study by S75 analytical gel filtration chromatography (fig. S10B) | <ol style="list-style-type: none"> <li>1) [KaiB<sub>fs-nmr</sub>]-KaiB_Y8A_Y94A_G89A_D91R_N29A_1-99_FLAG / 30</li> <li>2) [CikA<sub>PsR</sub>]-CikA_613-729 / 30</li> <li>3) [T627R-CikA<sub>PsR</sub>]-CikA_T627R_613-729 / 30</li> <li>4) [C630R-CikA<sub>PsR</sub>]-CikA_C630R_613-729 / 30</li> <li>5) [R650D-CikA<sub>PsR</sub>]-CikA_R650D_613-729 / 30</li> </ol>                                                                                                                                                                                                                                            | <ul style="list-style-type: none"> <li>• Volume: 250 µL</li> <li>• Temp: room temp (~22 °C)</li> <li>• Buffer: 20 mM Tris, 100 mM NaCl, pH 7.0</li> </ul>                                                                                                                                                                                                                                                                                                                                                                                                                       |
| CikA <sub>PsR</sub> -KaiB <sub>fs-nmr</sub> complex mutagenesis study by S75 analytical gel filtration chromatography (fig. S10C) | <ol style="list-style-type: none"> <li>1) [CikA<sub>PsR</sub>]-CikA_613-729 / 30</li> <li>2) [KaiB<sub>fs-nmr</sub>]-KaiB_Y8A_Y94A_G89A_D91R_N29A_1-99_FLAG / 30</li> <li>3) [E33A-KaiB<sub>fs-nmr</sub>]-KaiB_Y8A_Y94A_G89A_D91R_N29A_E33A_1-99_FLAG / 30</li> <li>4) [A41D-KaiB<sub>fs-nmr</sub>]-KaiB_Y8A_Y94A_G89A_D91R_N29A_A41D_1-99_FLAG / 30</li> <li>5) [K43E-KaiB<sub>fs-nmr</sub>]-KaiB_Y8A_Y94A_G89A_D91R_N29A_K43E_1-99_FLAG / 30</li> </ol>                                                                                                                                                           | <ul style="list-style-type: none"> <li>• Volume: 250 µL</li> <li>• Temperature: room temperature (~22 °C)</li> <li>• Buffer: 20 mM Tris, 100 mM NaCl, pH 7.0</li> </ul>                                                                                                                                                                                                                                                                                                                                                                                                         |
| Methyl-TROSY NMR of KaiA <sub>ΔN</sub> -KaiB-CI <sub>mono</sub> interactions (fig. S5, A to C)                                    | <ol style="list-style-type: none"> <li>1) [KaiA<sub>ΔN</sub>]-FLAG_KaiA_147-283 (U-[<sup>15</sup>N, <sup>2</sup>H]-Ile-δ-[<sup>13</sup>C, <sup>1</sup>H] labeled) / 20</li> <li>2) [KaiB]-KaiB_1-108 / 50</li> <li>3) [CI<sub>mono</sub>]-FLAG_KaiC_R41A-K173A_1-247_FLAG / 50</li> <li>4) [KaiB<sub>fs-crysl</sub>]-KaiB_Y8A_Y94A_G89A_D91R_1-99 / 50</li> </ol>                                                                                                                                                                                                                                                   | <ul style="list-style-type: none"> <li>• Volume: 330 µL</li> <li>• Pre-experiment incubation time for mixtures: 24 hrs.</li> <li>• <sup>13</sup>C / <sup>1</sup>H sweep width (Hz): 1209.247 / 3894.081</li> <li>• <sup>13</sup>C / <sup>1</sup>H carrier (Hz): 1626.00 / -379.00</li> <li>• <sup>13</sup>C / <sup>1</sup>H acquisition time (ms): 79.3 / 63.9</li> <li>• Temp: 25 °C</li> <li>• Buffer in 99.96 % D<sub>2</sub>O: 20 mM Tris, 100 mM NaCl, 5 mM DTT, 1 mM ATP, 1 mM MgCl<sub>2</sub>, 10 µM DSS, 0.02% NaN<sub>3</sub>, pH 7</li> <li>• Shaped tube</li> </ul> |
| Methyl-TROSY NMR of CikA <sub>PsR</sub> -KaiB-CI <sub>mono</sub> interactions (fig. S5, D to I)                                   | <ol style="list-style-type: none"> <li>1) [CikA<sub>PsR</sub>]-CikA_613-729 (U-[<sup>15</sup>N, <sup>2</sup>H]-Ile-δ-[<sup>13</sup>C, <sup>1</sup>H] labeled) / 20</li> <li>2) [CI<sub>mono</sub>]-FLAG_KaiC_R41A-K173A_1-247_FLAG / 50</li> <li>3) [KaiB]-KaiB_1-108 / 50</li> <li>4) [KaiB<sub>fs</sub>]-FLAG_KaiB_G89A-D91R_1-108_FLAG / 50</li> <li>5) [N29A-KaiB<sub>fs</sub>]-FLAG_KaiB_G89A-D91R_N29A_1-108_FLAG / 50</li> <li>6) [KaiB<sub>fs-nmr</sub>]-KaiB_Y8A_Y94A_G89A_D91R_N29A_1-99_FLAG / 50</li> <li>7) [KaiA<sub>ΔN</sub>]-FLAG_KaiA_147-283 / 110</li> <li>8) [KaiA]-KaiA_1-283 / 110</li> </ol> | <ul style="list-style-type: none"> <li>• Volume: 330 µL</li> <li>• Pre-experiment incubation time for mixtures: 24 hrs.</li> <li>• <sup>13</sup>C / <sup>1</sup>H sweep width (Hz): 2418.494 / 3894.081</li> <li>• <sup>13</sup>C / <sup>1</sup>H carrier (Hz): 1626.00 / -379.00</li> <li>• <sup>13</sup>C / <sup>1</sup>H acquisition time (ms): 41.3 / 63.9</li> <li>• Temp: 25 °C</li> <li>• Buffer in 99.96 % D<sub>2</sub>O: 20 mM Tris, 100 mM NaCl, 5 mM DTT, 1 mM ATP, 1 mM MgCl<sub>2</sub>, 10 µM DSS, 0.02% NaN<sub>3</sub>, pH 7</li> <li>• Shaped tube</li> </ul> |

|                                                                                                                                                                                               |                                                                                                                                                                                                                                                    |                                                                                                                                                                                                                                                                                                                                                                                                                                                                                                                                                                                      |
|-----------------------------------------------------------------------------------------------------------------------------------------------------------------------------------------------|----------------------------------------------------------------------------------------------------------------------------------------------------------------------------------------------------------------------------------------------------|--------------------------------------------------------------------------------------------------------------------------------------------------------------------------------------------------------------------------------------------------------------------------------------------------------------------------------------------------------------------------------------------------------------------------------------------------------------------------------------------------------------------------------------------------------------------------------------|
| <sup>15</sup> N-HSQC NMR for KaiA <sub>ΔN</sub> and L155A-KaiA <sub>ΔN</sub> (fig. S8A)                                                                                                       | 1) [KaiA <sub>ΔN</sub> ]-FLAG_KaiA_147-283 (U- <sup>15</sup> N labeled) / 40<br>2) [L155A-KaiA <sub>ΔN</sub> ]-FLAG_KaiA_L155A_147-283 (U- <sup>15</sup> N labeled) / 40                                                                           | <ul style="list-style-type: none"> <li>• Volume: 350 μL</li> <li>• <sup>15</sup>N / <sup>1</sup>HN sweep width (Hz): 1583.901 / 9615.385</li> <li>• <sup>15</sup>N / <sup>1</sup>HN carrier (Hz): 7278.86 / 2824.00</li> <li>• <sup>15</sup>N / <sup>1</sup>HN acquisition time (ms): 63.1 / 68.8</li> <li>• Temp: 25 °C</li> <li>• Buffer in 5% D<sub>2</sub>O: 20 mM Tris, 100 mM NaCl, 0.02% NaN<sub>3</sub>, 10 μM DSS, pH 7</li> <li>• Shaped tube</li> </ul>                                                                                                                   |
| <sup>15</sup> N-HSQC NMR for CikA <sub>P<sub>SR</sub></sub> and C630R-CikA <sub>P<sub>SR</sub></sub> (fig. S8B)                                                                               | 1) [CikA <sub>P<sub>SR</sub></sub> ]-CikA_613-729 (U- <sup>15</sup> N labeled) / 100<br>2) [C630R-CikA <sub>P<sub>SR</sub></sub> ]-CikA_C630R_613-729 (U- <sup>15</sup> N labeled) / 100                                                           | <ul style="list-style-type: none"> <li>• Volume: 350 μL</li> <li>• <sup>15</sup>N / <sup>1</sup>HN sweep width (Hz): 1583.901 / 9615.385</li> <li>• <sup>15</sup>N / <sup>1</sup>HN carrier (Hz): 7278.86 / 2824.00</li> <li>• <sup>15</sup>N / <sup>1</sup>HN acquisition time (ms): 63.1 / 68.8</li> <li>• Temp: 25 °C</li> <li>• Buffer in 5% D<sub>2</sub>O: 20 mM Tris, 100 mM NaCl, 5 mM TCEP, 0.02% NaN<sub>3</sub>, 10 μM DSS, pH 7</li> <li>• Shaped tube</li> </ul>                                                                                                        |
| <sup>15</sup> N-HSQC NMR for <i>Synechococcus elongatus</i> PCC 7942 proteins: CikA <sub>P<sub>SR</sub></sub> <sup>Se</sup> and C644R-CikA <sub>P<sub>SR</sub></sub> <sup>Se</sup> (fig. S8C) | 1) [CikA <sub>P<sub>SR</sub></sub> <sup>Se</sup> ]-CikA <sup>Se</sup> _627-745 (U- <sup>15</sup> N labeled) / 100<br>2) [C644R-CikA <sub>P<sub>SR</sub></sub> <sup>Se</sup> ]-CikA <sup>Se</sup> _C644R_627-745 (U- <sup>15</sup> N labeled) / 100 | <ul style="list-style-type: none"> <li>• Volume: 350 μL</li> <li>• <sup>15</sup>N / <sup>1</sup>HN sweep width (Hz): 1583.901 / 9615.385</li> <li>• <sup>15</sup>N / <sup>1</sup>HN carrier (Hz): 7278.86 / 2824.00</li> <li>• <sup>15</sup>N / <sup>1</sup>HN acquisition time (ms): 63.1 / 68.8</li> <li>• Temp: 25 °C</li> <li>• Buffer in 5% D<sub>2</sub>O: 20 mM Tris, 100 mM NaCl, 5 mM TCEP, 0.02% NaN<sub>3</sub>, 10 μM DSS, pH 7</li> <li>• Shaped tube</li> </ul>                                                                                                        |
| 3D HNCACB and HN(CO)CACB NMR for free KaiB <sub>fs-nmr</sub>                                                                                                                                  | 1) [KaiB <sub>fs-nmr</sub> ]-KaiB_Y8A_Y94A_G89A_D91R_N29A_1-99_FLAG (U- <sup>15</sup> N, <sup>13</sup> C labeled) / 800                                                                                                                            | <ul style="list-style-type: none"> <li>• Volume: 350 μL</li> <li>• <sup>13</sup>C / <sup>15</sup>N / <sup>1</sup>HN sweep width (Hz): 9500.000 / 1583.899 / 7211.539</li> <li>• <sup>13</sup>C / <sup>15</sup>N / <sup>1</sup>HN carrier (Hz): 6575.41 / 7278.86 / 2828.00</li> <li>• <sup>13</sup>C / <sup>15</sup>N / <sup>1</sup>HN acquisition time (ms): 6.9 / 23.9 / 67.9</li> <li>• Temp: 25 °C</li> <li>• Buffer in 5% D<sub>2</sub>O: 20 mM Tris, 100 mM NaCl, 5 mM TCEP, 0.02% NaN<sub>3</sub>, 10 μM DSS, pH 7, 1x protease inhibitor</li> <li>• Shaped tube</li> </ul>   |
| 3D HN(CA)CO and HNCO NMR for free KaiB <sub>fs-nmr</sub>                                                                                                                                      | 1) [KaiB <sub>fs-nmr</sub> ]-KaiB_Y8A_Y94A_G89A_D91R_N29A_1-99_FLAG (U- <sup>15</sup> N, <sup>13</sup> C labeled) / 800                                                                                                                            | <ul style="list-style-type: none"> <li>• Volume: 350 μL</li> <li>• <sup>13</sup>C / <sup>15</sup>N / <sup>1</sup>HN sweep width (Hz): 1500.000 / 1583.899 / 7211.539</li> <li>• <sup>13</sup>C / <sup>15</sup>N / <sup>1</sup>HN carrier (Hz): 26225.41 / 7278.86 / 2828.00</li> <li>• <sup>13</sup>C / <sup>15</sup>N / <sup>1</sup>HN acquisition time (ms): 30.0 / 23.3 / 67.9</li> <li>• Temp: 25 °C</li> <li>• Buffer in 5% D<sub>2</sub>O: 20 mM Tris, 100 mM NaCl, 5 mM TCEP, 0.02% NaN<sub>3</sub>, 10 μM DSS, pH 7, 1x protease inhibitor</li> <li>• Shaped tube</li> </ul> |

|                                                                                        |                                                                                                                                           |                                                                                                                                                                                                                                                                                                                                                                                                                                                                                                                                                                                                                                         |
|----------------------------------------------------------------------------------------|-------------------------------------------------------------------------------------------------------------------------------------------|-----------------------------------------------------------------------------------------------------------------------------------------------------------------------------------------------------------------------------------------------------------------------------------------------------------------------------------------------------------------------------------------------------------------------------------------------------------------------------------------------------------------------------------------------------------------------------------------------------------------------------------------|
| <p>3D HBHA(CO)NH<br/>NMR for free<br/>KaiB<sub>fs-nmr</sub></p>                        | <p>1) [KaiB<sub>fs-nmr</sub>]-<br/>KaiB_Y8A_Y94A_G89A_D91R_N29A<br/>_1-99_FLAG (U-[<sup>15</sup>N, <sup>13</sup>C] labeled) /<br/>800</p> | <ul style="list-style-type: none"> <li>• Volume: 350 µL</li> <li>• <sup>1</sup>H / <sup>15</sup>N / <sup>1</sup>HN sweep width (Hz):<br/>4000.000 / 1583.899 / 7211.539</li> <li>• <sup>1</sup>H / <sup>15</sup>N / <sup>1</sup>HN carrier (Hz): 2828.00 /<br/>7278.86 / 2828.00</li> <li>• <sup>1</sup>H / <sup>15</sup>N / <sup>1</sup>HN acquisition time (ms):<br/>13.0 / 23.9 / 67.9</li> <li>• Temp: 25 °C</li> <li>• Buffer in 5% D<sub>2</sub>O: 20 mM Tris, 100 mM<br/>NaCl, 5 mM TCEP, 0.02% NaN<sub>3</sub>, 10 µM<br/>DSS, pH 7, 1x protease inhibitor</li> <li>• Shaped tube</li> </ul>                                    |
| <p>3D HCC(CO)NH<br/>NMR for free<br/>KaiB<sub>fs-nmr</sub><br/><br/>Proton version</p> | <p>1) [KaiB<sub>fs-nmr</sub>]-<br/>KaiB_Y8A_Y94A_G89A_D91R_N29A<br/>_1-99_FLAG (U-[<sup>15</sup>N, <sup>13</sup>C] labeled) /<br/>800</p> | <ul style="list-style-type: none"> <li>• Volume: 350 µL</li> <li>• <sup>1</sup>H / <sup>15</sup>N / <sup>1</sup>HN sweep width (Hz):<br/>4000.000 / 1583.899 / 7211.539</li> <li>• <sup>1</sup>H / <sup>15</sup>N / <sup>1</sup>HN carrier (Hz): 2828.00 /<br/>7278.86 / 2828.00</li> <li>• <sup>1</sup>H / <sup>15</sup>N / <sup>1</sup>HN acquisition time (ms):<br/>13.0 / 23.9 / 67.9</li> <li>• Mixing time (ms): 120</li> <li>• Temp: 25 °C</li> <li>• Buffer in 5% D<sub>2</sub>O: 20 mM Tris, 100 mM<br/>NaCl, 5 mM TCEP, 0.02% NaN<sub>3</sub>, 10 µM<br/>DSS, pH 7, 1x protease inhibitor</li> <li>• Shaped tube</li> </ul>   |
| <p>3D HCC(CO)NH<br/>NMR for free<br/>KaiB<sub>fs-nmr</sub><br/><br/>Carbon version</p> | <p>1) [KaiB<sub>fs-nmr</sub>]-<br/>KaiB_Y8A_Y94A_G89A_D91R_N29A<br/>_1-99_FLAG (U-[<sup>15</sup>N, <sup>13</sup>C] labeled) /<br/>800</p> | <ul style="list-style-type: none"> <li>• Volume: 350 µL</li> <li>• <sup>13</sup>C / <sup>15</sup>N / <sup>1</sup>HN sweep width (Hz):<br/>9674.291 / 1583.899 / 7211.539</li> <li>• <sup>13</sup>C / <sup>15</sup>N / <sup>1</sup>HN carrier (Hz): 6537.93 /<br/>7278.86 / 2828.00</li> <li>• <sup>13</sup>C / <sup>15</sup>N / <sup>1</sup>HN acquisition time (ms): 8.0<br/>/ 23.9 / 67.9</li> <li>• Mixing time (ms): 120</li> <li>• Temp: 25 °C</li> <li>• Buffer in 5% D<sub>2</sub>O: 20 mM Tris, 100 mM<br/>NaCl, 5 mM TCEP, 0.02% NaN<sub>3</sub>, 10 µM<br/>DSS, pH 7, 1x protease inhibitor</li> <li>• Shaped tube</li> </ul> |
| <p>3D <sup>15</sup>N-NOESY-<br/>HSQC NMR for free<br/>KaiB<sub>fs-nmr</sub></p>        | <p>1) [KaiB<sub>fs-nmr</sub>]-<br/>KaiB_Y8A_Y94A_G89A_D91R_N29A<br/>_1-99_FLAG (U-[<sup>15</sup>N, <sup>13</sup>C] labeled) /<br/>800</p> | <ul style="list-style-type: none"> <li>• Volume: 350 µL</li> <li>• <sup>1</sup>H / <sup>15</sup>N / <sup>1</sup>HN sweep width (Hz):<br/>6011.328 / 1583.899 / 7211.539</li> <li>• <sup>1</sup>H / <sup>15</sup>N / <sup>1</sup>HN carrier (Hz): 2828.00 /<br/>7278.86 / 2828.00</li> <li>• <sup>1</sup>H / <sup>15</sup>N / <sup>1</sup>HN acquisition time (ms):<br/>24.9 / 21.4 / 67.9</li> <li>• Mixing time (ms): 180</li> <li>• Temp: 25 °C</li> <li>• Buffer in 5% D<sub>2</sub>O: 20 mM Tris, 100 mM<br/>NaCl, 5 mM TCEP, 0.02% NaN<sub>3</sub>, 10 µM<br/>DSS, pH 7, 1x protease inhibitor</li> <li>• Shaped tube</li> </ul>   |

|                                                                                               |                                                                                                                             |                                                                                                                                                                                                                                                                                                                                                                                                                                                                                                                                                                                                                   |
|-----------------------------------------------------------------------------------------------|-----------------------------------------------------------------------------------------------------------------------------|-------------------------------------------------------------------------------------------------------------------------------------------------------------------------------------------------------------------------------------------------------------------------------------------------------------------------------------------------------------------------------------------------------------------------------------------------------------------------------------------------------------------------------------------------------------------------------------------------------------------|
| <p>3D <sup>13</sup>C-NOESY-HSQC NMR for free KaiB<sub>fs-nmr</sub></p>                        | <p>1) [KaiB<sub>fs-nmr</sub>]-KaiB_Y8A_Y94A_G89A_D91R_N29A_1-99_FLAG (U-[<sup>15</sup>N, <sup>13</sup>C] labeled) / 800</p> | <ul style="list-style-type: none"> <li>• Volume: 350 μL</li> <li>• <sup>1</sup>H / <sup>13</sup>C / <sup>1</sup>H sweep width (Hz): 4027.582 / 5215.029 / 6009.615</li> <li>• <sup>1</sup>H / <sup>13</sup>C / <sup>1</sup>H carrier (Hz): 1643.56 / 6011.05 / 1643.56</li> <li>• <sup>1</sup>H / <sup>13</sup>C / <sup>1</sup>H acquisition time (ms): 32.2 / 9.9 / 67.8</li> <li>• Mixing time (ms): 150</li> <li>• Temp: 25 °C</li> <li>• Buffer in 99.96% D<sub>2</sub>O: 20 mM Tris, 100 mM NaCl, 5 mM TCEP, 0.02% NaN<sub>3</sub>, 10 μM DSS, pH 7, 1x protease inhibitor</li> <li>• Shaped tube</li> </ul> |
| <p>3D <sup>13</sup>C-HCCH-COSY NMR for free KaiB<sub>fs-nmr</sub><br/><br/>Proton version</p> | <p>1) [KaiB<sub>fs-nmr</sub>]-KaiB_Y8A_Y94A_G89A_D91R_N29A_1-99_FLAG (U-[<sup>15</sup>N, <sup>13</sup>C] labeled) / 800</p> | <ul style="list-style-type: none"> <li>• Volume: 350 μL</li> <li>• <sup>1</sup>H / <sup>13</sup>C / <sup>1</sup>H sweep width (Hz): 4027.584 / 5215.027 / 6009.615</li> <li>• <sup>1</sup>H / <sup>13</sup>C / <sup>1</sup>H carrier (Hz): 1643.56 / 6011.05 / 1643.56</li> <li>• <sup>1</sup>H / <sup>13</sup>C / <sup>1</sup>H acquisition time (ms): 32.2 / 9.9 / 67.8</li> <li>• Temp: 25 °C</li> <li>• Buffer in 99.96% D<sub>2</sub>O: 20 mM Tris, 100 mM NaCl, 5 mM TCEP, 0.02% NaN<sub>3</sub>, 10 μM DSS, pH 7, 1x protease inhibitor</li> <li>• Shaped tube</li> </ul>                                  |
| <p>3D <sup>13</sup>C-HCCH-COSY NMR for free KaiB<sub>fs-nmr</sub><br/><br/>Carbon version</p> | <p>1) [KaiB<sub>fs-nmr</sub>]-KaiB_Y8A_Y94A_G89A_D91R_N29A_1-99_FLAG (U-[<sup>15</sup>N, <sup>13</sup>C] labeled) / 800</p> | <ul style="list-style-type: none"> <li>• Volume: 350 μL</li> <li>• <sup>13</sup>C / <sup>13</sup>C / <sup>1</sup>H sweep width (Hz): 5215.027 / 5215.027 / 6009.615</li> <li>• <sup>13</sup>C / <sup>13</sup>C / <sup>1</sup>H carrier (Hz): 6011.05 / 6011.05 / 1643.56</li> <li>• <sup>13</sup>C / <sup>13</sup>C / <sup>1</sup>H acquisition time (ms): 9.9 / 9.9 / 67.8</li> <li>• Temp: 25 °C</li> <li>• Buffer in 99.96% D<sub>2</sub>O: 20 mM Tris, 100 mM NaCl, 5 mM TCEP, 0.02% NaN<sub>3</sub>, 10 μM DSS, pH 7, 1x protease inhibitor</li> <li>• Shaped tube</li> </ul>                                |
| <p>3D HCAN and HCA(CO)N NMR for free KaiB<sub>fs-nmr</sub></p>                                | <p>1) [KaiB<sub>fs-nmr</sub>]-KaiB_Y8A_Y94A_G89A_D91R_N29A_1-99_FLAG (U-[<sup>15</sup>N, <sup>13</sup>C] labeled) / 800</p> | <ul style="list-style-type: none"> <li>• Volume: 350 μL</li> <li>• <sup>15</sup>N / <sup>13</sup>C / <sup>1</sup>H sweep width (Hz): 1583.901 / 4534.871 / 6009.615</li> <li>• <sup>15</sup>N / <sup>13</sup>C / <sup>1</sup>H carrier (Hz): 7278.98 / 8086.90 / 2850.40</li> <li>• <sup>15</sup>N / <sup>13</sup>C / <sup>1</sup>H acquisition time (ms): 23.9 / 9.9 / 63.8</li> <li>• Temp: 25 °C</li> <li>• Buffer in 99.96% D<sub>2</sub>O: 20 mM Tris, 100 mM NaCl, 5 mM TCEP, 0.02% NaN<sub>3</sub>, 10 μM DSS, pH 7, 1x protease inhibitor</li> <li>• Shaped tube</li> </ul>                               |

|                                                                                                                                               |                                                                                                                             |                                                                                                                                                                                                                                                                                                                                                                                                                                                                                                                                                                                                                                               |
|-----------------------------------------------------------------------------------------------------------------------------------------------|-----------------------------------------------------------------------------------------------------------------------------|-----------------------------------------------------------------------------------------------------------------------------------------------------------------------------------------------------------------------------------------------------------------------------------------------------------------------------------------------------------------------------------------------------------------------------------------------------------------------------------------------------------------------------------------------------------------------------------------------------------------------------------------------|
| <p>3D IPAP-J-HNCO(CA) NMR with 5.16% stretched polyacrylamide gel</p> <p>RDC of free KaiB<sub>fs-nmr</sub> measures: <sup>1</sup>J(CA-HA)</p> | <p>1) [KaiB<sub>fs-nmr</sub>]-KaiB_Y8A_Y94A_G89A_D91R_N29A_1-99_FLAG (U-[<sup>15</sup>N, <sup>13</sup>C] labeled) / 356</p> | <ul style="list-style-type: none"> <li>• <sup>13</sup>C / <sup>15</sup>N / <sup>1</sup>HN sweep width (Hz): 1500.000 / 1583.899 / 7211.539</li> <li>• <sup>13</sup>C / <sup>15</sup>N / <sup>1</sup>HN carrier (Hz): 26187.80 / 7278.86 / 2823.20</li> <li>• <sup>13</sup>C / <sup>15</sup>N / <sup>1</sup>HN acquisition time (ms): 50.6 / 23.3 / 67.9</li> <li>• Temp: 25 °C</li> <li>• Buffer in 10% D<sub>2</sub>O: 10 mM Tris, 50 mM NaCl, 5 mM TCEP, 0.02% NaN<sub>3</sub>, 10 μM DSS, pH 7, 1x protease inhibitor</li> <li>• Aligned sample: 4.2mm new era NMR tubes (NE-UP5-GT-7)</li> <li>• Isotropic sample: shaped tube</li> </ul> |
| <p>3D IPAP-J-HNCO NMR for 5.16% stretched polyacrylamide gel</p> <p>RDC of free KaiB<sub>fs-nmr</sub> measures: <sup>1</sup>J(N-H)</p>        | <p>1) [KaiB<sub>fs-nmr</sub>]-KaiB_Y8A_Y94A_G89A_D91R_N29A_1-99_FLAG (U-[<sup>15</sup>N, <sup>13</sup>C] labeled) / 356</p> | <ul style="list-style-type: none"> <li>• <sup>13</sup>C / <sup>15</sup>N / <sup>1</sup>HN sweep width (Hz): 1500.004 / 1583.899 / 7211.539</li> <li>• <sup>13</sup>C / <sup>15</sup>N / <sup>1</sup>HN carrier (Hz): 26187.80 / 7278.86 / 2823.20</li> <li>• <sup>13</sup>C / <sup>15</sup>N / <sup>1</sup>HN acquisition time (ms): 19.9 / 46.7 / 67.9</li> <li>• Temp: 25 °C</li> <li>• Buffer in 10% D<sub>2</sub>O: 10 mM Tris, 50 mM NaCl, 5 mM TCEP, 0.02% NaN<sub>3</sub>, 10 μM DSS, pH 7, 1x protease inhibitor</li> <li>• Aligned sample: 4.2mm new era NMR tubes (NE-UP5-GT-7)</li> <li>• Isotropic sample: shaped tube</li> </ul> |
| <p>3D IPAP-J-HNCO NMR for 5.16% stretched polyacrylamide gel</p> <p>RDC of free KaiB<sub>fs-nmr</sub> measures: <sup>1</sup>J(CA-CO)</p>      | <p>1) [KaiB<sub>fs-nmr</sub>]-KaiB_Y8A_Y94A_G89A_D91R_N29A_1-99_FLAG (U-[<sup>15</sup>N, <sup>13</sup>C] labeled) / 356</p> | <ul style="list-style-type: none"> <li>• <sup>13</sup>C / <sup>15</sup>N / <sup>1</sup>HN sweep width (Hz): 1500.000 / 1583.899 / 7211.539</li> <li>• <sup>13</sup>C / <sup>15</sup>N / <sup>1</sup>HN carrier (Hz): 26187.80 / 7278.86 / 2823.20</li> <li>• <sup>13</sup>C / <sup>15</sup>N / <sup>1</sup>HN acquisition time (ms): 50.6 / 23.3 / 67.9</li> <li>• Temp: 25 °C</li> <li>• Buffer in 10% D<sub>2</sub>O: 10 mM Tris, 50 mM NaCl, 5 mM TCEP, 0.02% NaN<sub>3</sub>, 10 μM DSS, pH 7, 1x protease inhibitor</li> <li>• Aligned sample: 4.2mm new era NMR tubes (NE-UP5-GT-7)</li> <li>• Isotropic sample: shaped tube</li> </ul> |
| <p>3D HNCACB and HN(CO)CACB NMR for free CikA<sub>PsR</sub></p>                                                                               | <p>1) [CikA<sub>PsR</sub>]-CikA_613-729 (U-[<sup>15</sup>N, <sup>13</sup>C] labeled) / 1500</p>                             | <ul style="list-style-type: none"> <li>• Volume: 350 μL</li> <li>• <sup>13</sup>C / <sup>15</sup>N / <sup>1</sup>HN sweep width (Hz): 11337.012 / 1583.899 / 9615.385</li> <li>• <sup>13</sup>C / <sup>15</sup>N / <sup>1</sup>HN carrier (Hz): 6537.93 / 7278.86 / 2823.00</li> <li>• <sup>13</sup>C / <sup>15</sup>N / <sup>1</sup>HN acquisition time (ms): 6.3 / 23.3 / 68.8</li> <li>• Temp: 25 °C</li> <li>• Buffer in 5% D<sub>2</sub>O: 20 mM Tris, 100 mM NaCl, 5 mM TCEP, 0.02% NaN<sub>3</sub>, 10 μM DSS, pH 7, 1x protease inhibitor</li> <li>• Shaped tube</li> </ul>                                                           |

|                                                                                |                                                                                                          |                                                                                                                                                                                                                                                                                                                                                                                                                                                                                                                                                                                                                      |
|--------------------------------------------------------------------------------|----------------------------------------------------------------------------------------------------------|----------------------------------------------------------------------------------------------------------------------------------------------------------------------------------------------------------------------------------------------------------------------------------------------------------------------------------------------------------------------------------------------------------------------------------------------------------------------------------------------------------------------------------------------------------------------------------------------------------------------|
| 3D HN(CA)CO and HNCO NMR for free CikA <sub>P<sub>SR</sub></sub>               | 1) [CikA <sub>P<sub>SR</sub></sub> ]-CikA_613-729 (U-[ <sup>15</sup> N, <sup>13</sup> C] labeled) / 1500 | <ul style="list-style-type: none"> <li>• Volume: 350 µL</li> <li>• <sup>13</sup>C / <sup>15</sup>N / <sup>1</sup>HN sweep width (Hz): 1500.004 / 1583.899 / 9615.385</li> <li>• <sup>13</sup>C / <sup>15</sup>N / <sup>1</sup>HN carrier (Hz): 26225.41 / 7278.86 / 2823.00</li> <li>• <sup>13</sup>C / <sup>15</sup>N / <sup>1</sup>HN acquisition time (ms): 29.9 / 23.9 / 68.8</li> <li>• Temp: 25 °C</li> <li>• Buffer in 5% D<sub>2</sub>O: 20 mM Tris, 100 mM NaCl, 5 mM TCEP, 0.02% NaN<sub>3</sub>, 10 µM DSS, pH 7, 1x protease inhibitor</li> <li>• Shaped tube</li> </ul>                                 |
| 3D HBHA(CO)NH NMR for free CikA <sub>P<sub>SR</sub></sub>                      | 1) [CikA <sub>P<sub>SR</sub></sub> ]-CikA_613-729 (U-[ <sup>15</sup> N, <sup>13</sup> C] labeled) / 1500 | <ul style="list-style-type: none"> <li>• Volume: 350 µL</li> <li>• <sup>1</sup>H / <sup>15</sup>N / <sup>1</sup>HN sweep width (Hz): 4000.000 / 1583.899 / 9615.385</li> <li>• <sup>1</sup>H / <sup>15</sup>N / <sup>1</sup>HN carrier (Hz): 2823.00 / 7278.86 / 2823.00</li> <li>• <sup>1</sup>H / <sup>15</sup>N / <sup>1</sup>HN acquisition time (ms): 13.0 / 23.9 / 68.8</li> <li>• Temp: 25 °C</li> <li>• Buffer in 5% D<sub>2</sub>O: 20 mM Tris, 100 mM NaCl, 5 mM TCEP, 0.02% NaN<sub>3</sub>, 10 µM DSS, pH 7, 1x protease inhibitor</li> <li>• Shaped tube</li> </ul>                                     |
| 3D HCC(CO)NH NMR for free CikA <sub>P<sub>SR</sub></sub><br><br>Proton version | 1) [CikA <sub>P<sub>SR</sub></sub> ]-CikA_613-729 (U-[ <sup>15</sup> N, <sup>13</sup> C] labeled) / 1500 | <ul style="list-style-type: none"> <li>• Volume: 350 µL</li> <li>• <sup>1</sup>H / <sup>15</sup>N / <sup>1</sup>HN sweep width (Hz): 4000.000 / 1583.899 / 9615.385</li> <li>• <sup>1</sup>H / <sup>15</sup>N / <sup>1</sup>HN carrier (Hz): 2823.00 / 7278.86 / 2823.00</li> <li>• <sup>1</sup>H / <sup>15</sup>N / <sup>1</sup>HN acquisition time (ms): 13.0 / 23.9 / 68.8</li> <li>• Mixing time (ms): 120</li> <li>• Temp: 25 °C</li> <li>• Buffer in 5% D<sub>2</sub>O: 20 mM Tris, 100 mM NaCl, 5 mM TCEP, 0.02% NaN<sub>3</sub>, 10 µM DSS, pH 7, 1x protease inhibitor</li> <li>• Shaped tube</li> </ul>    |
| 3D HCC(CO)NH NMR for free CikA <sub>P<sub>SR</sub></sub><br><br>Carbon version | 1) [CikA <sub>P<sub>SR</sub></sub> ]-CikA_613-729 (U-[ <sup>15</sup> N, <sup>13</sup> C] labeled) / 1500 | <ul style="list-style-type: none"> <li>• Volume: 350 µL</li> <li>• <sup>13</sup>C / <sup>15</sup>N / <sup>1</sup>HN sweep width (Hz): 11337.012 / 1583.899 / 9615.385</li> <li>• <sup>13</sup>C / <sup>15</sup>N / <sup>1</sup>HN carrier (Hz): 6537.93 / 7278.86 / 2828.00</li> <li>• <sup>13</sup>C / <sup>15</sup>N / <sup>1</sup>HN acquisition time (ms): 6.2 / 23.9 / 68.8</li> <li>• Mixing time (ms): 120</li> <li>• Temp: 25 °C</li> <li>• Buffer in 5% D<sub>2</sub>O: 20 mM Tris, 100 mM NaCl, 5 mM TCEP, 0.02% NaN<sub>3</sub>, 10 µM DSS, pH 7, 1x protease inhibitor</li> <li>• Shaped tube</li> </ul> |

|                                                                                                       |                                                                                                            |                                                                                                                                                                                                                                                                                                                                                                                                                                                                                                                                                                                                                    |
|-------------------------------------------------------------------------------------------------------|------------------------------------------------------------------------------------------------------------|--------------------------------------------------------------------------------------------------------------------------------------------------------------------------------------------------------------------------------------------------------------------------------------------------------------------------------------------------------------------------------------------------------------------------------------------------------------------------------------------------------------------------------------------------------------------------------------------------------------------|
| <p>3D <sup>15</sup>N-NOESY-HSQC NMR for free Cika<sub>P<sub>SR</sub></sub></p>                        | <p>1) [Cika<sub>P<sub>SR</sub></sub>]-Cika_613-729 (U-[<sup>15</sup>N, <sup>13</sup>C] labeled) / 1500</p> | <ul style="list-style-type: none"> <li>• Volume: 350 μL</li> <li>• <sup>1</sup>H / <sup>15</sup>N / <sup>1</sup>HN sweep width (Hz): 5530.422 / 1583.899 / 9615.385</li> <li>• <sup>1</sup>H / <sup>15</sup>N / <sup>1</sup>HN carrier (Hz): 2823.00 / 7278.86 / 2823.00</li> <li>• <sup>1</sup>H / <sup>15</sup>N / <sup>1</sup>HN acquisition time (ms): 23.1 / 21.4 / 68.8</li> <li>• Mixing time (ms): 180</li> <li>• Temp: 25 °C</li> <li>• Buffer in 5% D<sub>2</sub>O: 20 mM Tris, 100 mM NaCl, 5 mM TCEP, 0.02% NaN<sub>3</sub>, 10 μM DSS, pH 7, 1x protease inhibitor</li> <li>• Shaped tube</li> </ul>  |
| <p>3D <sup>13</sup>C-NOESY-HSQC NMR for free Cika<sub>P<sub>SR</sub></sub></p>                        | <p>1) [Cika<sub>P<sub>SR</sub></sub>]-Cika_613-729 (U-[<sup>15</sup>N, <sup>13</sup>C] labeled) / 1500</p> | <ul style="list-style-type: none"> <li>• Volume: 350 μL</li> <li>• <sup>1</sup>H / <sup>13</sup>C / <sup>1</sup>H sweep width (Hz): 4027.582 / 4534.808 / 6009.615</li> <li>• <sup>1</sup>H / <sup>13</sup>C / <sup>1</sup>H carrier (Hz): 1643.56 / 6011.05 / 1643.56</li> <li>• <sup>1</sup>H / <sup>13</sup>C / <sup>1</sup>H acquisition time (ms): 32.2 / 10.1 / 63.9</li> <li>• Mixing time (ms): 150</li> <li>• Temp: 25 °C</li> <li>• Buffer in 99.96% D<sub>2</sub>O: 20 mM Tris, 100 mM NaCl, 5 mM TCEP, 0.02% NaN<sub>3</sub>, 10 μM DSS, pH 7, 1x protease inhibitor</li> <li>• Shaped tube</li> </ul> |
| <p>3D <sup>13</sup>C-HCCH-COSY NMR for free Cika<sub>P<sub>SR</sub></sub><br/><br/>Proton version</p> | <p>1) [Cika<sub>P<sub>SR</sub></sub>]-Cika_613-729 (U-[<sup>15</sup>N, <sup>13</sup>C] labeled) / 1500</p> | <ul style="list-style-type: none"> <li>• Volume: 350 μL</li> <li>• <sup>1</sup>H / <sup>13</sup>C / <sup>1</sup>H sweep width (Hz): 4027.582 / 4534.808 / 6009.615</li> <li>• <sup>1</sup>H / <sup>13</sup>C / <sup>1</sup>H carrier (Hz): 1643.56 / 6011.05 / 1643.56</li> <li>• <sup>1</sup>H / <sup>13</sup>C / <sup>1</sup>H acquisition time (ms): 32.2 / 10.1 / 63.9</li> <li>• Temp: 25 °C</li> <li>• Buffer in 99.96% D<sub>2</sub>O: 20 mM Tris, 100 mM NaCl, 5 mM TCEP, 0.02% NaN<sub>3</sub>, 10 μM DSS, pH 7, 1x protease inhibitor</li> <li>• Shaped tube</li> </ul>                                  |
| <p>3D <sup>13</sup>C-HCCH-COSY NMR for free Cika<sub>P<sub>SR</sub></sub><br/><br/>Carbon version</p> | <p>1) [Cika<sub>P<sub>SR</sub></sub>]-Cika_613-729 (U-[<sup>15</sup>N, <sup>13</sup>C] labeled) / 1500</p> | <ul style="list-style-type: none"> <li>• Volume: 350 μL</li> <li>• <sup>13</sup>C / <sup>13</sup>C / <sup>1</sup>H sweep width (Hz): 4534.808 / 4534.808 / 6009.615</li> <li>• <sup>13</sup>C / <sup>13</sup>C / <sup>1</sup>H carrier (Hz): 6011.05 / 6011.05 / 1643.56</li> <li>• <sup>13</sup>C / <sup>13</sup>C / <sup>1</sup>H acquisition time (ms): 10.1 / 10.1 / 63.9</li> <li>• Temp: 25 °C</li> <li>• Buffer in 99.96% D<sub>2</sub>O: 20 mM Tris, 100 mM NaCl, 5 mM TCEP, 0.02% NaN<sub>3</sub>, 10 μM DSS, pH 7, 1x protease inhibitor</li> <li>• Shaped tube</li> </ul>                               |

|                                                                                                                                           |                                                                                                                                                                               |                                                                                                                                                                                                                                                                                                                                                                                                                                                                                                                                                                                                                                               |
|-------------------------------------------------------------------------------------------------------------------------------------------|-------------------------------------------------------------------------------------------------------------------------------------------------------------------------------|-----------------------------------------------------------------------------------------------------------------------------------------------------------------------------------------------------------------------------------------------------------------------------------------------------------------------------------------------------------------------------------------------------------------------------------------------------------------------------------------------------------------------------------------------------------------------------------------------------------------------------------------------|
| <p>3D IPAP-J-HNCO(CA) NMR for 5.16% stretched polyacrylamide gel</p> <p>RDC of free CikA<sub>PsR</sub> measures: <sup>1</sup>J(CA-HA)</p> | <p>1) [CikA<sub>PsR</sub>]-CikA_613-729 (U-[<sup>15</sup>N, <sup>13</sup>C] labeled) / 450</p>                                                                                | <ul style="list-style-type: none"> <li>• <sup>13</sup>C / <sup>15</sup>N / <sup>1</sup>HN sweep width (Hz): 1500.004 / 1583.899 / 9615.385</li> <li>• <sup>13</sup>C / <sup>15</sup>N / <sup>1</sup>HN carrier (Hz): 26187.80 / 7278.86 / 2823.20</li> <li>• <sup>13</sup>C / <sup>15</sup>N / <sup>1</sup>HN acquisition time (ms): 50.6 / 23.3 / 68.9</li> <li>• Temp: 25 °C</li> <li>• Buffer in 10% D<sub>2</sub>O: 10 mM Tris, 50 mM NaCl, 5 mM TCEP, 0.02% NaN<sub>3</sub>, 10 μM DSS, pH 7, 1x protease inhibitor</li> <li>• Aligned sample: 4.2mm new era NMR tubes (NE-UP5-GT-7)</li> <li>• Isotropic sample: shaped tube</li> </ul> |
| <p>3D IPAP-J-HNCO NMR for 5.16% stretched polyacrylamide gel</p> <p>RDC of free CikA<sub>PsR</sub> measures: <sup>1</sup>J(N-H)</p>       | <p>1) [CikA<sub>PsR</sub>]-CikA_613-729 (U-[<sup>15</sup>N, <sup>13</sup>C] labeled) / 450</p>                                                                                | <ul style="list-style-type: none"> <li>• <sup>13</sup>C / <sup>15</sup>N / <sup>1</sup>HN sweep width (Hz): 1500.004 / 1583.899 / 9615.385</li> <li>• <sup>13</sup>C / <sup>15</sup>N / <sup>1</sup>HN carrier (Hz): 26187.80 / 7278.86 / 2823.20</li> <li>• <sup>13</sup>C / <sup>15</sup>N / <sup>1</sup>HN acquisition time (ms): 19.9 / 46.7 / 68.8</li> <li>• Temp: 25 °C</li> <li>• Buffer in 10% D<sub>2</sub>O: 10 mM Tris, 50 mM NaCl, 5 mM TCEP, 0.02% NaN<sub>3</sub>, 10 μM DSS, pH 7, 1x protease inhibitor</li> <li>• Aligned sample: 4.2mm new era NMR tubes (NE-UP5-GT-7)</li> <li>• Isotropic sample: shaped tube</li> </ul> |
| <p>3D IPAP-J-HNCO NMR for 5.16%, stretched polyacrylamide gel</p> <p>RDC of free CikA<sub>PsR</sub> measures: <sup>1</sup>J(CA-CO)</p>    | <p>1) [CikA<sub>PsR</sub>]-CikA_613-729 (U-[<sup>15</sup>N, <sup>13</sup>C] labeled) / 450</p>                                                                                | <ul style="list-style-type: none"> <li>• <sup>13</sup>C / <sup>15</sup>N / <sup>1</sup>HN sweep width (Hz): 1500.004 / 1583.899 / 9615.385</li> <li>• <sup>13</sup>C / <sup>15</sup>N / <sup>1</sup>HN carrier (Hz): 26187.80 / 7278.86 / 2823.20</li> <li>• <sup>13</sup>C / <sup>15</sup>N / <sup>1</sup>HN acquisition time (ms): 50.6 / 23.3 / 68.8</li> <li>• Temp: 25 °C</li> <li>• Buffer in 10% D<sub>2</sub>O: 10 mM Tris, 50 mM NaCl, 5 mM TCEP, 0.02% NaN<sub>3</sub>, 10 μM DSS, pH 7, 1x protease inhibitor</li> <li>• Aligned sample: 4.2mm new era NMR tubes (NE-UP5-GT-7)</li> <li>• Isotropic sample: shaped tube</li> </ul> |
| <p>3D HNCACB and HN(CO)CACB NMR for labeled KaiB<sub>fs-nmr</sub> + 1.1x unlabeled CikA<sub>PsR</sub></p>                                 | <p>1) [KaiB<sub>fs-nmr</sub>]-KaiB_Y8A_Y94A_G89A_D91R_N29A_1-99_FLAG (U-[<sup>15</sup>N, <sup>13</sup>C] labeled) / 800</p> <p>2) [CikA<sub>PsR</sub>]-CikA_613-729 / 880</p> | <ul style="list-style-type: none"> <li>• Volume: 380 μL</li> <li>• <sup>13</sup>C / <sup>15</sup>N / <sup>1</sup>HN sweep width (Hz): 9500.000 / 1583.899 / 7211.539</li> <li>• <sup>13</sup>C / <sup>15</sup>N / <sup>1</sup>HN carrier (Hz): 6159.72 / 7278.86 / 2828.00</li> <li>• <sup>13</sup>C / <sup>15</sup>N / <sup>1</sup>HN acquisition time (ms): 7.0 / 23.9 / 62.8</li> <li>• Temp: 50 °C</li> <li>• Buffer in 5% D<sub>2</sub>O: 20 mM Tris, 100 mM NaCl, 5 mM TCEP, 0.02% NaN<sub>3</sub>, 10 μM DSS, pH 7, 1x protease inhibitor</li> <li>• Shaped tube</li> </ul>                                                            |



|                                                                                                                                                                                                           |                                                                                                                                                                                        |                                                                                                                                                                                                                                                                                                                                                                                                                                                                                                                                                                                                                    |
|-----------------------------------------------------------------------------------------------------------------------------------------------------------------------------------------------------------|----------------------------------------------------------------------------------------------------------------------------------------------------------------------------------------|--------------------------------------------------------------------------------------------------------------------------------------------------------------------------------------------------------------------------------------------------------------------------------------------------------------------------------------------------------------------------------------------------------------------------------------------------------------------------------------------------------------------------------------------------------------------------------------------------------------------|
| <p>3D HN(CA)CO and HNC(O) NMR for labeled KaiB<sub>fs-nmr</sub> + 1.1x unlabeled CikA<sub>P<sub>SR</sub></sub></p>                                                                                        | <p>1) [KaiB<sub>fs-nmr</sub>]-KaiB_Y8A_Y94A_G89A_D91R_N29A_1-99_FLAG (U-[<sup>15</sup>N, <sup>13</sup>C] labeled) / 800<br/> 2) [CikA<sub>P<sub>SR</sub></sub>]-CikA_613-729 / 880</p> | <ul style="list-style-type: none"> <li>• Volume: 380 μL</li> <li>• <sup>13</sup>C / <sup>15</sup>N / <sup>1</sup>HN sweep width (Hz): 1500.000 / 1583.899 / 7211.539</li> <li>• <sup>13</sup>C / <sup>15</sup>N / <sup>1</sup>HN carrier (Hz): 25809.72 / 7278.86 / 2828.00</li> <li>• <sup>13</sup>C / <sup>15</sup>N / <sup>1</sup>HN acquisition time (ms): 30.0 / 23.3 / 62.8</li> <li>• Temp: 50 °C</li> <li>• Buffer in 5% D<sub>2</sub>O: 20 mM Tris, 100 mM NaCl, 5 mM TCEP, 0.02% NaN<sub>3</sub>, 10 μM DSS, pH 7, 1x protease inhibitor</li> <li>• Shaped tube</li> </ul>                               |
| <p>3D HBHA(CO)NH NMR for labeled KaiB<sub>fs-nmr</sub> + 1.1x unlabeled CikA<sub>P<sub>SR</sub></sub></p>                                                                                                 | <p>1) [KaiB<sub>fs-nmr</sub>]-KaiB_Y8A_Y94A_G89A_D91R_N29A_1-99_FLAG (U-[<sup>15</sup>N, <sup>13</sup>C] labeled) / 800<br/> 2) [CikA<sub>P<sub>SR</sub></sub>]-CikA_613-729 / 880</p> | <ul style="list-style-type: none"> <li>• Volume: 380 μL</li> <li>• <sup>1</sup>H / <sup>15</sup>N / <sup>1</sup>HN sweep width (Hz): 4000.000 / 1583.899 / 7211.539</li> <li>• <sup>1</sup>H / <sup>15</sup>N / <sup>1</sup>HN carrier (Hz): 2828.00 / 7278.86 / 2828.00</li> <li>• <sup>1</sup>H / <sup>15</sup>N / <sup>1</sup>HN acquisition time (ms): 13.0 / 23.9 / 62.8</li> <li>• Temp: 50 °C</li> <li>• Buffer in 5% D<sub>2</sub>O: 20 mM Tris, 100 mM NaCl, 5 mM TCEP, 0.02% NaN<sub>3</sub>, 10 μM DSS, pH 7, 1x protease inhibitor</li> <li>• Shaped tube</li> </ul>                                   |
| <p>3D <sup>15</sup>N-edited-NOESY-HSQC NMR for labeled KaiB<sub>fs-nmr</sub> + 1.1x unlabeled CikA<sub>P<sub>SR</sub></sub></p> <p>For intramolecular NOE of labeled KaiB<sub>fs-nmr</sub> in complex</p> | <p>1) [KaiB<sub>fs-nmr</sub>]-KaiB_Y8A_Y94A_G89A_D91R_N29A_1-99_FLAG (U-[<sup>15</sup>N, <sup>13</sup>C] labeled) / 800<br/> 2) [CikA<sub>P<sub>SR</sub></sub>]-CikA_613-729 / 880</p> | <ul style="list-style-type: none"> <li>• Volume: 380 μL</li> <li>• <sup>1</sup>H / <sup>15</sup>N / <sup>1</sup>HN sweep width (Hz): 5590.535 / 1583.899 / 9615.385</li> <li>• <sup>1</sup>H / <sup>15</sup>N / <sup>1</sup>HN carrier (Hz): 2828.00 / 7278.86 / 2828.00</li> <li>• <sup>1</sup>H / <sup>15</sup>N / <sup>1</sup>HN acquisition time (ms): 20.0 / 21.4 / 67.8</li> <li>• Mixing time (ms): 120</li> <li>• Temp: 50 °C</li> <li>• Buffer in 5% D<sub>2</sub>O: 20 mM Tris, 100 mM NaCl, 5 mM TCEP, 0.02% NaN<sub>3</sub>, 10 μM DSS, pH 7, 1x protease inhibitor</li> <li>• Shaped tube</li> </ul>  |
| <p>3D <sup>13</sup>C-edited-NOESY-HSQC NMR for labeled KaiB<sub>fs-nmr</sub> + 1.1x unlabeled CikA<sub>P<sub>SR</sub></sub></p> <p>For intramolecular NOE of labeled KaiB<sub>fs-nmr</sub> in complex</p> | <p>1) [KaiB<sub>fs-nmr</sub>]-KaiB_Y8A_Y94A_G89A_D91R_N29A_1-99_FLAG (U-[<sup>15</sup>N, <sup>13</sup>C] labeled) / 800<br/> 2) [CikA<sub>P<sub>SR</sub></sub>]-CikA_613-729 / 880</p> | <ul style="list-style-type: none"> <li>• Volume: 380 μL</li> <li>• <sup>1</sup>H / <sup>13</sup>C / <sup>1</sup>H sweep width (Hz): 3727.018 / 3023.204 / 7211.539</li> <li>• <sup>1</sup>H / <sup>13</sup>C / <sup>1</sup>H carrier (Hz): 1918.60 / 5944.17 / 1918.60</li> <li>• <sup>1</sup>H / <sup>13</sup>C / <sup>1</sup>H acquisition time (ms): 19.0 / 10.6 / 59.9</li> <li>• Mixing time (ms): 120</li> <li>• Temp: 50 °C</li> <li>• Buffer in 99.96% D<sub>2</sub>O: 20 mM Tris, 100 mM NaCl, 5 mM TCEP, 0.02% NaN<sub>3</sub>, 10 μM DSS, pH 7, 1x protease inhibitor</li> <li>• Shaped tube</li> </ul> |

|                                                                                                                                                |                                                                                                                                                                                          |                                                                                                                                                                                                                                                                                                                                                                                                                                                                                                                                                                                      |
|------------------------------------------------------------------------------------------------------------------------------------------------|------------------------------------------------------------------------------------------------------------------------------------------------------------------------------------------|--------------------------------------------------------------------------------------------------------------------------------------------------------------------------------------------------------------------------------------------------------------------------------------------------------------------------------------------------------------------------------------------------------------------------------------------------------------------------------------------------------------------------------------------------------------------------------------|
| <p>3D <sup>13</sup>C-HCCH-COSY NMR for labeled KaiB<sub>fs-nmr</sub> + 1.1x unlabeled CikA<sub>P<sub>SR</sub></sub></p> <p>Proton version</p>  | <p>1) [KaiB<sub>fs-nmr</sub>]-KaiB_Y8A_Y94A_G89A_D91R_N29A_1-99_FLAG (U-[<sup>15</sup>N, <sup>13</sup>C] labeled) / 800</p> <p>2) [CikA<sub>P<sub>SR</sub></sub>]-CikA_613-729 / 880</p> | <ul style="list-style-type: none"> <li>• Volume: 380 μL</li> <li>• <sup>1</sup>H / <sup>13</sup>C / <sup>1</sup>H sweep width (Hz): 4809.062 / 3023.204 / 7211.539</li> <li>• <sup>1</sup>H / <sup>13</sup>C / <sup>1</sup>H carrier (Hz): 1918.60 / 5944.17 / 1918.60</li> <li>• <sup>1</sup>H / <sup>13</sup>C / <sup>1</sup>H acquisition time (ms): 12.9 / 10.6 / 59.9</li> <li>• Temp: 50 °C</li> <li>• Buffer in 99.96% D<sub>2</sub>O: 20 mM Tris, 100 mM NaCl, 5 mM TCEP, 0.02% NaN<sub>3</sub>, 10 μM DSS, pH 7, 1x protease inhibitor</li> <li>• Shaped tube</li> </ul>    |
| <p>3D <sup>13</sup>C-HCCH-COSY NMR for labeled KaiB<sub>fs-nmr</sub> + 1.1x unlabeled CikA<sub>P<sub>SR</sub></sub></p> <p>Carbon version</p>  | <p>1) [KaiB<sub>fs-nmr</sub>]-KaiB_Y8A_Y94A_G89A_D91R_N29A_1-99_FLAG (U-[<sup>15</sup>N, <sup>13</sup>C] labeled) / 800</p> <p>2) [CikA<sub>P<sub>SR</sub></sub>]-CikA_613-729 / 880</p> | <ul style="list-style-type: none"> <li>• Volume: 380 μL</li> <li>• <sup>13</sup>C / <sup>13</sup>C / <sup>1</sup>H sweep width (Hz): 3023.204 / 3023.204 / 7211.539</li> <li>• <sup>13</sup>C / <sup>13</sup>C / <sup>1</sup>H carrier (Hz): 5944.17 / 5944.17 / 1918.60</li> <li>• <sup>13</sup>C / <sup>13</sup>C / <sup>1</sup>H acquisition time (ms): 10.6 / 10.6 / 59.9</li> <li>• Temp: 50 °C</li> <li>• Buffer in 99.96% D<sub>2</sub>O: 20 mM Tris, 100 mM NaCl, 5 mM TCEP, 0.02% NaN<sub>3</sub>, 10 μM DSS, pH 7, 1x protease inhibitor</li> <li>• Shaped tube</li> </ul> |
| <p>3D <sup>13</sup>C-HCCH-TOCSY NMR for labeled KaiB<sub>fs-nmr</sub> + 1.1x unlabeled CikA<sub>P<sub>SR</sub></sub></p> <p>Carbon version</p> | <p>1) [KaiB<sub>fs-nmr</sub>]-KaiB_Y8A_Y94A_G89A_D91R_N29A_1-99_FLAG (U-[<sup>15</sup>N, <sup>13</sup>C] labeled) / 800</p> <p>2) [CikA<sub>P<sub>SR</sub></sub>]-CikA_613-729 / 880</p> | <ul style="list-style-type: none"> <li>• Volume: 380 μL</li> <li>• <sup>13</sup>C / <sup>13</sup>C / <sup>1</sup>H sweep width (Hz): 3023.204 / 3023.204 / 7211.539</li> <li>• <sup>13</sup>C / <sup>13</sup>C / <sup>1</sup>H carrier (Hz): 5944.17 / 5944.17 / 1918.60</li> <li>• <sup>13</sup>C / <sup>13</sup>C / <sup>1</sup>H acquisition time (ms): 10.6 / 10.6 / 59.9</li> <li>• Temp: 50 °C</li> <li>• Buffer in 99.96% D<sub>2</sub>O: 20 mM Tris, 100 mM NaCl, 5 mM TCEP, 0.02% NaN<sub>3</sub>, 10 μM DSS, pH 7, 1x protease inhibitor</li> <li>• Shaped tube</li> </ul> |
| <p>3D HCAN and HCA(CO)N NMR for labeled KaiB<sub>fs-nmr</sub> + 1.1x unlabeled CikA<sub>P<sub>SR</sub></sub></p>                               | <p>1) [KaiB<sub>fs-nmr</sub>]-KaiB_Y8A_Y94A_G89A_D91R_N29A_1-99_FLAG (U-[<sup>15</sup>N, <sup>13</sup>C] labeled) / 800</p> <p>2) [CikA<sub>P<sub>SR</sub></sub>]-CikA_613-729 / 880</p> | <ul style="list-style-type: none"> <li>• Volume: 380 μL</li> <li>• <sup>15</sup>N / <sup>13</sup>C / <sup>1</sup>H sweep width (Hz): 1583.899 / 3023.247 / 7211.539</li> <li>• <sup>15</sup>N / <sup>13</sup>C / <sup>1</sup>H carrier (Hz): 7278.98 / 8086.90 / 2850.40</li> <li>• <sup>15</sup>N / <sup>13</sup>C / <sup>1</sup>H acquisition time (ms): 23.9 / 10.6 / 59.9</li> <li>• Temp: 50 °C</li> <li>• Buffer in 99.96% D<sub>2</sub>O: 20 mM Tris, 100 mM NaCl, 5 mM TCEP, 0.02% NaN<sub>3</sub>, 10 μM DSS, pH 7, 1x protease inhibitor</li> <li>• Shaped tube</li> </ul> |

|                                                                                                                                                                                               |                                                                                                                                                                                                       |                                                                                                                                                                                                                                                                                                                                                                                                                                                                                                                                                                                                                                                                                                                                                                  |
|-----------------------------------------------------------------------------------------------------------------------------------------------------------------------------------------------|-------------------------------------------------------------------------------------------------------------------------------------------------------------------------------------------------------|------------------------------------------------------------------------------------------------------------------------------------------------------------------------------------------------------------------------------------------------------------------------------------------------------------------------------------------------------------------------------------------------------------------------------------------------------------------------------------------------------------------------------------------------------------------------------------------------------------------------------------------------------------------------------------------------------------------------------------------------------------------|
| <p>3D IPAP-J-HNCO(CA) NMR for 5.5% stretched polyacrylamide gel</p> <p>RDC of labeled KaiB<sub>fs-nmr</sub> + 1.1x unlabeled CikA<sub>P<sub>SR</sub></sub> measures: <sup>1</sup>J(CA-HA)</p> | <p>1) [KaiB<sub>fs-nmr</sub>]-KaiB_Y8A_Y94A_G89A_D91R_N29A_1-99_FLAG (U-[<sup>15</sup>N, <sup>13</sup>C] labeled) / 700</p> <p>2) [CikA<sub>P<sub>SR</sub></sub>]-CikA_613-729 / 770</p>              | <ul style="list-style-type: none"> <li>• <sup>13</sup>C / <sup>15</sup>N / <sup>1</sup>HN sweep width (Hz): 1500.000 / 1583.899 / 7211.539</li> <li>• <sup>13</sup>C / <sup>15</sup>N / <sup>1</sup>HN carrier (Hz): 26187.80 / 7278.86 / 2823.20</li> <li>• <sup>13</sup>C / <sup>15</sup>N / <sup>1</sup>HN acquisition time (ms): 50.6 / 23.3 / 67.9</li> <li>• Temp: 50 °C</li> <li>• Buffer in 10% D<sub>2</sub>O: 10 mM Tris, 50 mM NaCl, 5 mM TCEP, 0.02% NaN<sub>3</sub>, 10 μM DSS, pH 7, 1x protease inhibitor</li> <li>• Aligned sample: 4.2mm new era NMR tubes (NE-UP5-GT-7)</li> <li>• Isotropic sample: shaped tube</li> </ul>                                                                                                                    |
| <p>3D IPAP-J-HNCO NMR for 5.5% stretched polyacrylamide gel</p> <p>RDC of labeled KaiB<sub>fs-nmr</sub> + 1.1x unlabeled CikA<sub>P<sub>SR</sub></sub> measures: <sup>1</sup>J(N-H)</p>       | <p>1) [KaiB<sub>fs-nmr</sub>]-KaiB_Y8A_Y94A_G89A_D91R_N29A_1-99_FLAG (U-[<sup>15</sup>N, <sup>13</sup>C] labeled) / 700</p> <p>2) [CikA<sub>P<sub>SR</sub></sub>]-CikA_613-729 / 770</p>              | <ul style="list-style-type: none"> <li>• <sup>13</sup>C / <sup>15</sup>N / <sup>1</sup>HN sweep width (Hz): 1500.004 / 1583.899 / 7211.539</li> <li>• <sup>13</sup>C / <sup>15</sup>N / <sup>1</sup>HN carrier (Hz): 26187.80 / 7278.86 / 2823.20</li> <li>• <sup>13</sup>C / <sup>15</sup>N / <sup>1</sup>HN acquisition time (ms): 19.9 / 46.7 / 67.9</li> <li>• Temp: 50 °C</li> <li>• Buffer in 10% D<sub>2</sub>O: 10 mM Tris, 50 mM NaCl, 5 mM TCEP, 0.02% NaN<sub>3</sub>, 10 μM DSS, pH 7, 1x protease inhibitor</li> <li>• Aligned sample: 4.2mm new era NMR tubes (NE-UP5-GT-7)</li> <li>• Isotropic sample: shaped tube</li> </ul>                                                                                                                    |
| <p>3D IPAP-J-HNCO NMR for 5.5% stretched polyacrylamide gel</p> <p>RDC of labeled KaiB<sub>fs-nmr</sub> + 1.1x unlabeled CikA<sub>P<sub>SR</sub></sub> measures: <sup>1</sup>J(CA-CO)</p>     | <p>1) [KaiB<sub>fs-nmr</sub>]-KaiB_Y8A_Y94A_G89A_D91R_N29A_1-99_FLAG (U-[<sup>15</sup>N, <sup>13</sup>C] labeled) / 700</p> <p>2) [CikA<sub>P<sub>SR</sub></sub>]-CikA_613-729 / 770</p>              | <ul style="list-style-type: none"> <li>• <sup>13</sup>C / <sup>15</sup>N / <sup>1</sup>HN sweep width (Hz): 1500.000 / 1583.899 / 7211.539</li> <li>• <sup>13</sup>C / <sup>15</sup>N / <sup>1</sup>HN carrier (Hz): 26187.80 / 7278.86 / 2823.20</li> <li>• <sup>13</sup>C / <sup>15</sup>N / <sup>1</sup>HN acquisition time (ms): 50.6 / 23.3 / 67.9</li> <li>• Temp: 50 °C</li> <li>• Buffer in 10% D<sub>2</sub>O: 10 mM Tris, 50 mM NaCl, 5 mM TCEP, 0.02% NaN<sub>3</sub>, 10 μM DSS, pH 7, 1x protease inhibitor</li> <li>• Aligned sample: 4.2mm new era NMR tubes (NE-UP5-GT-7)</li> <li>• Isotropic sample: shaped tube</li> </ul>                                                                                                                    |
| <p>4D <sup>15</sup>N, <sup>13</sup>C-edited-NOESY-HSQC NMR for labeled KaiB<sub>fs-nmr</sub> + 1.1x unlabeled CikA<sub>P<sub>SR</sub></sub></p> <p>For intermolecular NOE</p>                 | <p>1) [KaiB<sub>fs-nmr</sub>]-KaiB_Y8A_Y94A_G89A_D91R_N29A_1-99_FLAG (U-[<sup>15</sup>N] labeled) / 800</p> <p>2) [CikA<sub>P<sub>SR</sub></sub>]-CikA_613-729 (U-[<sup>13</sup>C] labeled) / 880</p> | <ul style="list-style-type: none"> <li>• Volume: 380 μL <sup>13</sup>C / <sup>1</sup>H / <sup>15</sup>N / <sup>1</sup>HN</li> <li>• <sup>13</sup>C / <sup>1</sup>H / <sup>15</sup>N / <sup>1</sup>HN sweep width (Hz): 3023.208 / 4809.062 / 1583.899 / 7211.539</li> <li>• <sup>13</sup>C / <sup>1</sup>H / <sup>15</sup>N / <sup>1</sup>HN carrier (Hz): 6121.94 / 2828.00 / 7278.86 / 2828.00</li> <li>• <sup>13</sup>C / <sup>1</sup>H / <sup>15</sup>N / <sup>1</sup>HN acquisition time (ms): 5.2 / 11.8 / 10.1 / 62.8</li> <li>• Mixing time (ms): 180</li> <li>• Temp: 50 °C</li> <li>• Buffer in 5% D<sub>2</sub>O: 20 mM Tris, 100 mM NaCl, 5 mM TCEP, 0.02% NaN<sub>3</sub>, 10 μM DSS, pH 7, 1x protease inhibitor</li> <li>• Shaped tube</li> </ul> |

|                                                                                                                                                                                                                |                                                                                                                                                                                                                |                                                                                                                                                                                                                                                                                                                                                                                                                                                                                                                                                                                                                                                                                                           |
|----------------------------------------------------------------------------------------------------------------------------------------------------------------------------------------------------------------|----------------------------------------------------------------------------------------------------------------------------------------------------------------------------------------------------------------|-----------------------------------------------------------------------------------------------------------------------------------------------------------------------------------------------------------------------------------------------------------------------------------------------------------------------------------------------------------------------------------------------------------------------------------------------------------------------------------------------------------------------------------------------------------------------------------------------------------------------------------------------------------------------------------------------------------|
| <p>3D <math>^{13}\text{C}</math>-edited, <math>^{12}\text{C}</math>-filtered NOESY-HSQC NMR for labeled KaiB<sub>fs-nmr</sub> + 1.1x unlabeled CikA<sub>P<sub>SR</sub></sub></p> <p>For intermolecular NOE</p> | <p>1) [KaiB<sub>fs-nmr</sub>]-KaiB_Y8A_Y94A_G89A_D91R_N29A_1-99_FLAG (U-<math>^{15}\text{N}</math>, <math>^{13}\text{C}</math> labeled) / 800</p> <p>2) [CikA<sub>P<sub>SR</sub></sub>]-CikA_613-729 / 880</p> | <ul style="list-style-type: none"> <li>• Volume: 380 <math>\mu\text{L}</math></li> <li>• <math>^1\text{H} / ^{13}\text{C} / ^1\text{H}</math> sweep width (Hz): 3606.792 / 3023.204 / 7211.539</li> <li>• <math>^1\text{H} / ^{13}\text{C} / ^1\text{H}</math> carrier (Hz): 1918.60 / 5944.17 / 1918.60</li> <li>• <math>^1\text{H} / ^{13}\text{C} / ^1\text{H}</math> acquisition time (ms): 19.9 / 11.2 / 59.9</li> <li>• Mixing time (ms): 150</li> <li>• Temp: 50 <math>^\circ\text{C}</math></li> <li>• Buffer in 99.96% D<sub>2</sub>O: 20 mM Tris, 100 mM NaCl, 5 mM TCEP, 0.02% NaN<sub>3</sub>, 10 <math>\mu\text{M}</math> DSS, pH 7, 1x protease inhibitor</li> <li>• Shaped tube</li> </ul> |
| <p>2D IPAP-J-HSQC NMR for 5.5% stretched polyacrylamide gel</p> <p>RDC of labeled KaiB<sub>fs-nmr</sub> + 1.1x unlabeled CikA<sub>P<sub>SR</sub></sub> measures: <math>^1\text{J}(\text{N-H})</math></p>       | <p>1) [KaiB<sub>fs-nmr</sub>]-KaiB_Y8A_Y94A_G89A_D91R_N29A_1-99_FLAG (U-<math>^{15}\text{N}</math> labeled) / 400</p> <p>2) [CikA<sub>P<sub>SR</sub></sub>]-CikA_613-729 / 440</p>                             | <ul style="list-style-type: none"> <li>• <math>^{15}\text{N} / ^1\text{HN}</math> sweep width (Hz): 1583.899 / 7211.539</li> <li>• <math>^{15}\text{N} / ^1\text{HN}</math> carrier (Hz): 7278.86 / 2835.00</li> <li>• <math>^{15}\text{N} / ^1\text{HN}</math> acquisition time (ms): 202 / 62.6</li> <li>• Temp: 50 <math>^\circ\text{C}</math></li> <li>• Buffer in 10% D<sub>2</sub>O: 10 mM Tris, 50 mM NaCl, 5 mM TCEP, 0.02% NaN<sub>3</sub>, 10 <math>\mu\text{M}</math> DSS, pH 7, 1x protease inhibitor</li> <li>• Aligned sample: 4.2mm new era NMR tubes (NE-UP5-GT-7)</li> <li>• Isotropic sample: shaped tube</li> </ul>                                                                    |
| <p>3D HNCACB and HN(CO)CACB NMR for labeled CikA<sub>P<sub>SR</sub></sub> + 1.1x unlabeled KaiB<sub>fs-nmr</sub></p>                                                                                           | <p>1) [CikA<sub>P<sub>SR</sub></sub>]-CikA_613-729 (U-<math>^{15}\text{N}</math>, <math>^{13}\text{C}</math> labeled) / 800</p> <p>2) [KaiB<sub>fs-nmr</sub>]-KaiB_Y8A_Y94A_G89A_D91R_N29A_1-99_FLAG / 880</p> | <ul style="list-style-type: none"> <li>• Volume: 380 <math>\mu\text{L}</math></li> <li>• <math>^{13}\text{C} / ^{15}\text{N} / ^1\text{HN}</math> sweep width (Hz): 9500.000 / 7211.539 / 1583.899 /</li> <li>• <math>^{13}\text{C} / ^{15}\text{N} / ^1\text{HN}</math> carrier (Hz): 6575.41 / 2828.00 / 7278.86 /</li> <li>• <math>^{13}\text{C} / ^{15}\text{N} / ^1\text{HN}</math> acquisition time (ms): 7.0 / 62.8 / 23.9</li> <li>• Temp: 50 <math>^\circ\text{C}</math></li> <li>• Buffer in 5% D<sub>2</sub>O: 20 mM Tris, 100 mM NaCl, 5 mM TCEP, 0.02% NaN<sub>3</sub>, 10 <math>\mu\text{M}</math> DSS, pH 7, 1x protease inhibitor</li> <li>• Shaped tube</li> </ul>                       |
| <p>3D HN(CA)CO and HNCO NMR for labeled CikA<sub>P<sub>SR</sub></sub> + 1.1x unlabeled KaiB<sub>fs-nmr</sub></p>                                                                                               | <p>1) [CikA<sub>P<sub>SR</sub></sub>]-CikA_613-729 (U-<math>^{15}\text{N}</math>, <math>^{13}\text{C}</math> labeled) / 800</p> <p>2) [KaiB<sub>fs-nmr</sub>]-KaiB_Y8A_Y94A_G89A_D91R_N29A_1-99_FLAG / 880</p> | <ul style="list-style-type: none"> <li>• Volume: 380 <math>\mu\text{L}</math></li> <li>• <math>^{13}\text{C} / ^{15}\text{N} / ^1\text{HN}</math> sweep width (Hz): 1500.004 / 1583.899 / 7211.539</li> <li>• <math>^{13}\text{C} / ^{15}\text{N} / ^1\text{HN}</math> carrier (Hz): 26225.41 / 7278.86 / 2828.00</li> <li>• <math>^{13}\text{C} / ^{15}\text{N} / ^1\text{HN}</math> acquisition time (ms): 30.0 / 23.3 / 62.8</li> <li>• Temp: 50 <math>^\circ\text{C}</math></li> <li>• Buffer in 5% D<sub>2</sub>O: 20 mM Tris, 100 mM NaCl, 5 mM TCEP, 0.02% NaN<sub>3</sub>, 10 <math>\mu\text{M}</math> DSS, pH 7, 1x protease inhibitor</li> <li>• Shaped tube</li> </ul>                         |

|                                                                                                                                                                                             |                                                                                                                                                                             |                                                                                                                                                                                                                                                                                                                                                                                                                                                                                                                                                                                                                    |
|---------------------------------------------------------------------------------------------------------------------------------------------------------------------------------------------|-----------------------------------------------------------------------------------------------------------------------------------------------------------------------------|--------------------------------------------------------------------------------------------------------------------------------------------------------------------------------------------------------------------------------------------------------------------------------------------------------------------------------------------------------------------------------------------------------------------------------------------------------------------------------------------------------------------------------------------------------------------------------------------------------------------|
| <p>3D HBHA(CO)NH NMR for labeled CikA<sub>PsR</sub> + 1.1x unlabeled KaiB<sub>fs-nmr</sub></p>                                                                                              | <p>1) [CikA<sub>PsR</sub>]-CikA_613-729 (U-[<sup>15</sup>N, <sup>13</sup>C] labeled) / 800<br/> 2) [KaiB<sub>fs-nmr</sub>]-KaiB_Y8A_Y94A_G89A_D91R_N29A_1-99_FLAG / 880</p> | <ul style="list-style-type: none"> <li>• Volume: 380 µL</li> <li>• <sup>1</sup>H / <sup>15</sup>N / <sup>1</sup>HN sweep width (Hz): 4000.000 / 1583.899 / 7211.539</li> <li>• <sup>1</sup>H / <sup>15</sup>N / <sup>1</sup>HN carrier (Hz): 2828.00 / 7278.86 / 2828.00</li> <li>• <sup>1</sup>H / <sup>15</sup>N / <sup>1</sup>HN acquisition time (ms): 13.0 / 23.9 / 62.8</li> <li>• Temp: 50 °C</li> <li>• Buffer in 5% D<sub>2</sub>O: 20 mM Tris, 100 mM NaCl, 5 mM TCEP, 0.02% NaN<sub>3</sub>, 10 µM DSS, pH 7, 1x protease inhibitor</li> <li>• Shaped tube</li> </ul>                                   |
| <p>3D <sup>15</sup>N-edited-NOESY-HSQC NMR for labeled CikA<sub>PsR</sub> + 1.1x unlabeled KaiB<sub>fs-nmr</sub></p> <p>For intramolecular NOE of labeled CikA<sub>PsR</sub> in complex</p> | <p>1) [CikA<sub>PsR</sub>]-CikA_613-729 (U-[<sup>15</sup>N, <sup>13</sup>C] labeled) / 800<br/> 2) [KaiB<sub>fs-nmr</sub>]-KaiB_Y8A_Y94A_G89A_D91R_N29A_1-99_FLAG / 880</p> | <ul style="list-style-type: none"> <li>• Volume: 380 µL</li> <li>• <sup>1</sup>H / <sup>15</sup>N / <sup>1</sup>HN sweep width (Hz): 5590.535 / 1583.899 / 9615.385</li> <li>• <sup>1</sup>H / <sup>15</sup>N / <sup>1</sup>HN carrier (Hz): 2828.00 / 7278.86 / 2828.00</li> <li>• <sup>1</sup>H / <sup>15</sup>N / <sup>1</sup>HN acquisition time (ms): 20.0 / 21.4 / 67.8</li> <li>• Mixing time (ms): 120</li> <li>• Temp: 50 °C</li> <li>• Buffer in 5% D<sub>2</sub>O: 20 mM Tris, 100 mM NaCl, 5 mM TCEP, 0.02% NaN<sub>3</sub>, 10 µM DSS, pH 7, 1x protease inhibitor</li> <li>• Shaped tube</li> </ul>  |
| <p>3D <sup>13</sup>C-edited-NOESY-HSQC NMR for labeled CikA<sub>PsR</sub> + 1.1x unlabeled KaiB<sub>fs-nmr</sub></p> <p>For intramolecular NOE of labeled CikA<sub>PsR</sub> in complex</p> | <p>1) [CikA<sub>PsR</sub>]-CikA_613-729 (U-[<sup>15</sup>N, <sup>13</sup>C] labeled) / 800<br/> 2) [KaiB<sub>fs-nmr</sub>]-KaiB_Y8A_Y94A_G89A_D91R_N29A_1-99_FLAG / 880</p> | <ul style="list-style-type: none"> <li>• Volume: 380 µL</li> <li>• <sup>1</sup>H / <sup>13</sup>C / <sup>1</sup>H sweep width (Hz): 4027.584 / 3023.204 / 7211.539</li> <li>• <sup>1</sup>H / <sup>13</sup>C / <sup>1</sup>H carrier (Hz): 1918.60 / 5944.17 / 1918.60</li> <li>• <sup>1</sup>H / <sup>13</sup>C / <sup>1</sup>H acquisition time (ms): 19.1 / 10.6 / 59.9</li> <li>• Mixing time (ms): 120</li> <li>• Temp: 50 °C</li> <li>• Buffer in 99.96% D<sub>2</sub>O: 20 mM Tris, 100 mM NaCl, 5 mM TCEP, 0.02% NaN<sub>3</sub>, 10 µM DSS, pH 7, 1x protease inhibitor</li> <li>• Shaped tube</li> </ul> |
| <p>3D <sup>13</sup>C-HCCH-COSY NMR for labeled CikA<sub>PsR</sub> + 1.1x unlabeled KaiB<sub>fs-nmr</sub></p> <p>Proton version</p>                                                          | <p>1) [CikA<sub>PsR</sub>]-CikA_613-729 (U-[<sup>15</sup>N, <sup>13</sup>C] labeled) / 800<br/> 2) [KaiB<sub>fs-nmr</sub>]-KaiB_Y8A_Y94A_G89A_D91R_N29A_1-99_FLAG / 880</p> | <ul style="list-style-type: none"> <li>• Volume: 380 µL</li> <li>• <sup>1</sup>H / <sup>13</sup>C / <sup>1</sup>H sweep width (Hz): 4809.062 / 3023.204 / 7211.539</li> <li>• <sup>1</sup>H / <sup>13</sup>C / <sup>1</sup>H carrier (Hz): 1918.60 / 5944.17 / 1918.60</li> <li>• <sup>1</sup>H / <sup>13</sup>C / <sup>1</sup>H acquisition time (ms): 12.9 / 10.6 / 59.9</li> <li>• Temp: 50 °C</li> <li>• Buffer in 99.96% D<sub>2</sub>O: 20 mM Tris, 100 mM NaCl, 5 mM TCEP, 0.02% NaN<sub>3</sub>, 10 µM DSS, pH 7, 1x protease inhibitor</li> <li>• Shaped tube</li> </ul>                                  |

|                                                                                                                                                                                                     |                                                                                                                                                                                                     |                                                                                                                                                                                                                                                                                                                                                                                                                                                                                                                                                                                                                                                                                                                                                                                                    |
|-----------------------------------------------------------------------------------------------------------------------------------------------------------------------------------------------------|-----------------------------------------------------------------------------------------------------------------------------------------------------------------------------------------------------|----------------------------------------------------------------------------------------------------------------------------------------------------------------------------------------------------------------------------------------------------------------------------------------------------------------------------------------------------------------------------------------------------------------------------------------------------------------------------------------------------------------------------------------------------------------------------------------------------------------------------------------------------------------------------------------------------------------------------------------------------------------------------------------------------|
| <p>3D <math>^{13}\text{C}</math>-HCCH-COSY NMR for labeled Cika<sub>PsR</sub> + 1.1x unlabeled KaiB<sub>fs-nmr</sub></p> <p>Carbon version</p>                                                      | <p>1) [Cika<sub>PsR</sub>]-Cika_613-729 (U-<math>^{15}\text{N}</math>, <math>^{13}\text{C}</math> labeled) / 800</p> <p>2) [KaiB<sub>fs-nmr</sub>]-KaiB_Y8A_Y94A_G89A_D91R_N29A_1-99_FLAG / 880</p> | <ul style="list-style-type: none"> <li>• Volume: 380 <math>\mu\text{L}</math></li> <li>• <math>^{13}\text{C}</math> / <math>^{13}\text{C}</math> / <math>^1\text{H}</math> sweep width (Hz): 3023.204 / 3023.204 / 7211.539</li> <li>• <math>^{13}\text{C}</math> / <math>^{13}\text{C}</math> / <math>^1\text{H}</math> carrier (Hz): 5944.17 / 5944.17 / 1918.60</li> <li>• <math>^{13}\text{C}</math> / <math>^{13}\text{C}</math> / <math>^1\text{H}</math> acquisition time (ms): 10.6 / 10.6 / 59.9</li> <li>• Temp: 50 <math>^\circ\text{C}</math></li> <li>• Buffer in 99.96% D<sub>2</sub>O: 20 mM Tris, 100 mM NaCl, 5 mM TCEP, 0.02% NaN<sub>3</sub>, 10 <math>\mu\text{M}</math> DSS, pH 7, 1x protease inhibitor</li> <li>• Shaped tube</li> </ul>                                    |
| <p>3D <math>^{13}\text{C}</math>-HCCH-TOCSY NMR for labeled Cika<sub>PsR</sub> + 1.1x unlabeled KaiB<sub>fs-nmr</sub></p> <p>Carbon version</p>                                                     | <p>1) [Cika<sub>PsR</sub>]-Cika_613-729 (U-<math>^{15}\text{N}</math>, <math>^{13}\text{C}</math> labeled) / 800</p> <p>2) [KaiB<sub>fs-nmr</sub>]-KaiB_Y8A_Y94A_G89A_D91R_N29A_1-99_FLAG / 880</p> | <ul style="list-style-type: none"> <li>• Volume: 380 <math>\mu\text{L}</math></li> <li>• <math>^{13}\text{C}</math> / <math>^{13}\text{C}</math> / <math>^1\text{H}</math> sweep width (Hz): 3023.204 / 3023.204 / 7211.539</li> <li>• <math>^{13}\text{C}</math> / <math>^{13}\text{C}</math> / <math>^1\text{H}</math> carrier (Hz): 5944.17 / 5944.17 / 1918.60</li> <li>• <math>^{13}\text{C}</math> / <math>^{13}\text{C}</math> / <math>^1\text{H}</math> acquisition time (ms): 10.6 / 10.6 / 59.9</li> <li>• Temp: 50 <math>^\circ\text{C}</math></li> <li>• Buffer in 99.96% D<sub>2</sub>O: 20 mM Tris, 100 mM NaCl, 5 mM TCEP, 0.02% NaN<sub>3</sub>, 10 <math>\mu\text{M}</math> DSS, pH 7, 1x protease inhibitor</li> <li>• Shaped tube</li> </ul>                                    |
| <p>3D IPAP-J-HNCO(CA) NMR for 5.5% stretched polyacrylamide gel</p> <p>RDC of labeled Cika<sub>PsR</sub> + 1.1x unlabeled KaiB<sub>fs-nmr</sub> measures: <math>^1\text{J}(\text{CA-HA})</math></p> | <p>1) [Cika<sub>PsR</sub>]-Cika_613-729 (U-<math>^{15}\text{N}</math>, <math>^{13}\text{C}</math> labeled) / 800</p> <p>2) [KaiB<sub>fs-nmr</sub>]-KaiB_Y8A_Y94A_G89A_D91R_N29A_1-99_FLAG / 880</p> | <ul style="list-style-type: none"> <li>• <math>^{13}\text{C}</math> / <math>^{15}\text{N}</math> / <math>^1\text{HN}</math> sweep width (Hz): 1500.000 / 1583.899 / 7211.539</li> <li>• <math>^{13}\text{C}</math> / <math>^{15}\text{N}</math> / <math>^1\text{HN}</math> carrier (Hz): 26187.80 / 7278.86 / 2823.20</li> <li>• <math>^{13}\text{C}</math> / <math>^{15}\text{N}</math> / <math>^1\text{HN}</math> acquisition time (ms): 50.6 / 23.3 / 67.9</li> <li>• Temp: 50 <math>^\circ\text{C}</math></li> <li>• Buffer in 10% D<sub>2</sub>O: 10 mM Tris, 50 mM NaCl, 5 mM TCEP, 0.02% NaN<sub>3</sub>, 10 <math>\mu\text{M}</math> DSS, pH 7, 1x protease inhibitor</li> <li>• Aligned sample: 4.2mm new era NMR tubes (NE-UP5-GT-7)</li> <li>• Isotropic sample: shaped tube</li> </ul> |
| <p>3D IPAP-J-HNCO NMR for 5.5% stretched polyacrylamide gel</p> <p>RDC of labeled Cika<sub>PsR</sub> + 1.1x unlabeled KaiB<sub>fs-nmr</sub> measures: <math>^1\text{J}(\text{N-H})</math></p>       | <p>1) [Cika<sub>PsR</sub>]-Cika_613-729 (U-<math>^{15}\text{N}</math>, <math>^{13}\text{C}</math> labeled) / 800</p> <p>2) [KaiB<sub>fs-nmr</sub>]-KaiB_Y8A_Y94A_G89A_D91R_N29A_1-99_FLAG / 880</p> | <ul style="list-style-type: none"> <li>• <math>^{13}\text{C}</math> / <math>^{15}\text{N}</math> / <math>^1\text{HN}</math> sweep width (Hz): 1500.004 / 1583.899 / 7211.539</li> <li>• <math>^{13}\text{C}</math> / <math>^{15}\text{N}</math> / <math>^1\text{HN}</math> carrier (Hz): 26187.80 / 7278.86 / 2823.20</li> <li>• <math>^{13}\text{C}</math> / <math>^{15}\text{N}</math> / <math>^1\text{HN}</math> acquisition time (ms): 19.9 / 46.7 / 67.9</li> <li>• Temp: 50 <math>^\circ\text{C}</math></li> <li>• Buffer in 10% D<sub>2</sub>O: 10 mM Tris, 50 mM NaCl, 5 mM TCEP, 0.02% NaN<sub>3</sub>, 10 <math>\mu\text{M}</math> DSS, pH 7, 1x protease inhibitor</li> <li>• Aligned sample: 4.2mm new era NMR tubes (NE-UP5-GT-7)</li> <li>• Isotropic sample: shaped tube</li> </ul> |

|                                                                                                                                                                                           |                                                                                                                                                                                                       |                                                                                                                                                                                                                                                                                                                                                                                                                                                                                                                                                                                                                                                                                                 |
|-------------------------------------------------------------------------------------------------------------------------------------------------------------------------------------------|-------------------------------------------------------------------------------------------------------------------------------------------------------------------------------------------------------|-------------------------------------------------------------------------------------------------------------------------------------------------------------------------------------------------------------------------------------------------------------------------------------------------------------------------------------------------------------------------------------------------------------------------------------------------------------------------------------------------------------------------------------------------------------------------------------------------------------------------------------------------------------------------------------------------|
| <p>3D IPAP-J-HNCO NMR for 5.5% stretched polyacrylamide gel</p> <p>RDC of labeled Cika<sub>P<sub>SR</sub></sub> + 1.1x unlabeled KaiB<sub>fs-nmr</sub> measures: <sup>1</sup>J(CA-CO)</p> | <p>1) [Cika<sub>P<sub>SR</sub></sub>]-Cika_613-729 (U-[<sup>15</sup>N, <sup>13</sup>C] labeled) / 800</p> <p>2) [KaiB<sub>fs-nmr</sub>]-KaiB_Y8A_Y94A_G89A_D91R_N29A_1-99_FLAG / 880</p>              | <ul style="list-style-type: none"> <li>• <sup>13</sup>C / <sup>15</sup>N / <sup>1</sup>HN sweep width (Hz): 1500.000 / 1583.899 / 7211.539</li> <li>• <sup>13</sup>C / <sup>15</sup>N / <sup>1</sup>HN carrier (Hz): 26187.80 / 7278.86 / 2823.20</li> <li>• <sup>13</sup>C / <sup>15</sup>N / <sup>1</sup>HN acquisition time (ms): 50.6 / 23.3 / 67.9</li> <li>• Temp: 50 °C</li> <li>• Buffer in 10% D<sub>2</sub>O: 10 mM Tris, 50 mM NaCl, 5 mM TCEP, 0.02% NaN<sub>3</sub>, 10 μM DSS, pH 7, 1x protease inhibitor</li> <li>• Aligned sample: 4.2mm new era NMR tubes (NE-UP5-GT-7)</li> <li>• Isotropic sample: shaped tube</li> </ul>                                                   |
| <p>4D <sup>15</sup>N, <sup>13</sup>C-edited-NOESY-HSQC NMR for labeled Cika<sub>P<sub>SR</sub></sub> + 1.1x unlabeled KaiB<sub>fs-nmr</sub></p> <p>For intermolecular NOE</p>             | <p>1) [Cika<sub>P<sub>SR</sub></sub>]-Cika_613-729 (U-[<sup>15</sup>N] labeled) / 800</p> <p>2) [KaiB<sub>fs-nmr</sub>]-KaiB_Y8A_Y94A_G89A_D91R_N29A_1-99_FLAG (U-[<sup>13</sup>C] labeled) / 880</p> | <ul style="list-style-type: none"> <li>• Volume: 380 μL</li> <li>• <sup>13</sup>C / <sup>1</sup>H / <sup>15</sup>N / <sup>1</sup>HN sweep width (Hz): 3023.208 / 4809.062 / 1583.899 / 7211.539</li> <li>• <sup>13</sup>C / <sup>1</sup>H / <sup>15</sup>N / <sup>1</sup>HN carrier (Hz): 6121.94 / 2828.00 / 7278.86 / 2828.00</li> <li>• <sup>13</sup>C / <sup>1</sup>H / <sup>15</sup>N / <sup>1</sup>HN acquisition time (ms): 5.2 / 11.8 / 10.1 / 62.8</li> <li>• Mixing time (ms): 150</li> <li>• Temp: 50 °C</li> <li>• Buffer in 5% D<sub>2</sub>O: 20 mM Tris, 100 mM NaCl, 5 mM TCEP, 0.02% NaN<sub>3</sub>, 10 μM DSS, pH 7, 1x protease inhibitor</li> <li>• Shaped tube</li> </ul> |
| <p>3D <sup>13</sup>C-edited, <sup>12</sup>C-filtered, NOESY-HSQC NMR for labeled Cika<sub>P<sub>SR</sub></sub> + 1.1x unlabeled KaiB<sub>fs-nmr</sub></p> <p>For intermolecular NOE</p>   | <p>1) [Cika<sub>P<sub>SR</sub></sub>]-Cika_613-729 (U-[<sup>15</sup>N, <sup>13</sup>C] labeled) / 800</p> <p>2) [KaiB<sub>fs-nmr</sub>]-KaiB_Y8A_Y94A_G89A_D91R_N29A_1-99_FLAG / 880</p>              | <ul style="list-style-type: none"> <li>• Volume: 380 μL</li> <li>• <sup>1</sup>H / <sup>13</sup>C / <sup>1</sup>H sweep width (Hz): 3606.792 / 3023.204 / 7211.539</li> <li>• <sup>1</sup>H / <sup>13</sup>C / <sup>1</sup>H carrier (Hz): 1918.60 / 5944.17 / 1918.60</li> <li>• <sup>1</sup>H / <sup>13</sup>C / <sup>1</sup>H acquisition time (ms): 19.9 / 11.2 / 59.9</li> <li>• Mixing time (ms): 150</li> <li>• Temp: 50 °C</li> <li>• Buffer in 99.96% D<sub>2</sub>O: 20 mM Tris, 100 mM NaCl, 5 mM TCEP, 0.02% NaN<sub>3</sub>, 10 μM DSS, pH 7, 1x protease inhibitor</li> <li>• Shaped tube</li> </ul>                                                                              |
| <p>2D IPAP-J-HSQC NMR for 5.5% stretched polyacrylamide gel</p> <p>RDC of labeled Cika<sub>P<sub>SR</sub></sub> + 1.1x unlabeled KaiB<sub>fs-nmr</sub> measures: <sup>1</sup>J(N-H)</p>   | <p>1) [Cika<sub>P<sub>SR</sub></sub>]-Cika_613-729 (U-[<sup>15</sup>N] labeled) / 400</p> <p>2) [KaiB<sub>fs-nmr</sub>]-KaiB_Y8A_Y94A_G89A_D91R_N29A_1-99_FLAG / 440</p>                              | <ul style="list-style-type: none"> <li>• <sup>15</sup>N / <sup>1</sup>HN sweep width (Hz): 1583.901 / 7211.539</li> <li>• <sup>15</sup>N / <sup>1</sup>HN carrier (Hz): 7278.86 / 2835.00</li> <li>• <sup>15</sup>N / <sup>1</sup>HN acquisition time (ms): 202 / 62.6</li> <li>• Temp: 50 °C</li> <li>• Buffer in 10% D<sub>2</sub>O: 10 mM Tris, 50 mM NaCl, 5 mM TCEP, 0.02% NaN<sub>3</sub>, 10 μM DSS, pH 7, 1x protease inhibitor</li> <li>• Aligned sample: 4.2mm new era NMR tubes (NE-UP5-GT-7)</li> <li>• Isotropic sample: shaped tube</li> </ul>                                                                                                                                    |

**Table S2. Crystal structures and refinement statistics (molecular replacement).**

|                                                     | <b>KaiB<sub>fs-crvst</sub>:CI<sub>crvst</sub></b> | <b>KaiA<sub>crvst</sub>:KaiB<sub>fs-crvst</sub>:CI<sub>crvst</sub></b> | <b>KaiB<sub>fs-crvst</sub>:KaiC<sub>S431E</sub></b> |
|-----------------------------------------------------|---------------------------------------------------|------------------------------------------------------------------------|-----------------------------------------------------|
| <b>Data collection</b>                              |                                                   |                                                                        |                                                     |
| Space group                                         | P22 <sub>1</sub> 2 <sub>1</sub>                   | P1                                                                     | P2 <sub>1</sub> 3                                   |
| Cell dimensions                                     |                                                   |                                                                        |                                                     |
| <i>a</i> , <i>b</i> , <i>c</i> (Å)                  | 42.5, 56.6, 146.1                                 | 74.6, 79.1, 80.8                                                       | 155.9, 155.9, 155.9                                 |
| $\alpha$ , $\beta$ , $\gamma$ (°)                   | 90.0, 90.0, 90.0                                  | 107.3, 90.7, 111.2                                                     | 90.0, 90.0, 90.0                                    |
| Resolution (Å) <sup>a</sup>                         | 73.07-1.9 (1.9-1.80)                              | 50.0-2.60 (2.64-2.60)                                                  | 90.02-3.87 (4.08-3.87)                              |
| No. total reflections                               | 109956                                            | 95617                                                                  | 100649                                              |
| No. unique reflections                              | 32797                                             | 47380                                                                  | 11991                                               |
| <i>R</i> <sub>merge</sub>                           | 10.3 (44.7)                                       | 6.2 (58.1)                                                             | 27.2 (105.9)                                        |
| <i>R</i> <sub>pim</sub>                             | 6.5 (26.8)                                        | 5.9 (54.8)                                                             | 9.6 (38.1)                                          |
| <i>I</i> / $\sigma$ <i>I</i>                        | 6.5 (3.1)                                         | 21.3 (2.5)                                                             | 7.2 (2.5)                                           |
| Completeness (%)                                    | 97.8 (99.3)                                       | 96.4 (97.4)                                                            | 99.7 (99.9)                                         |
| CC <sub>1/2</sub>                                   | 0.987 (0.701)                                     | 0.997 (0.557)                                                          | 0.987 (0.479)                                       |
| Wilson B-factor                                     | 15.9                                              | 48.5                                                                   | 96.1                                                |
| Redundancy                                          | 3.4 (3.6)                                         | 2.0 (2.1)                                                              | 8.4 (8.3)                                           |
| <b>Refinement</b>                                   |                                                   |                                                                        |                                                     |
| Resolution (Å)                                      | 1.80                                              | 2.60                                                                   | 3.87                                                |
| <i>R</i> <sub>work</sub> / <i>R</i> <sub>free</sub> | 21.9/25.7                                         | 18.5/24.2                                                              | 32.7/34.5                                           |
| No. atoms                                           |                                                   |                                                                        |                                                     |
| Protein                                             | 2382                                              | 9412                                                                   | 7303                                                |
| Ligand/ion                                          | 27                                                | 10                                                                     | 54                                                  |
| Water                                               | 262                                               | 106                                                                    | N/A                                                 |
| B-factors                                           |                                                   |                                                                        |                                                     |
| Protein                                             | 24                                                | 68                                                                     | 96                                                  |
| Ligand/ion                                          | 43                                                | 59                                                                     | 87                                                  |
| Water                                               | 34                                                | 53                                                                     | N/A                                                 |
| RMS deviations                                      |                                                   |                                                                        |                                                     |
| Bond lengths (Å)                                    | 0.014                                             | 0.004                                                                  | 0.006                                               |
| Bond angles (°)                                     | 1.54                                              | 0.92                                                                   | 1.49                                                |
| <b>Ramachandran<sup>b</sup></b>                     |                                                   |                                                                        |                                                     |
| Favored region (%)                                  | 97                                                | 98                                                                     | 84                                                  |
| Outliers (%)                                        | 0.3                                               | 0.2                                                                    | 4.6                                                 |

<sup>a</sup>Highest resolution shell is shown in parenthesis, <sup>b</sup>Values obtained from MolProbity (81).

One crystal was used for data collection. Data were collected at a wavelength of 1 Å  
Please see fig. S1 and table S1 for more details.



**Table S3. NMR structures and refinement statistics.**

|                                                                | <b>KaiB<sub>fs-nmr</sub></b> | <b>CikA<sub>PsR</sub></b> | <b>CikA<sub>PsR</sub>: KaiB<sub>fs-nmr</sub></b> |
|----------------------------------------------------------------|------------------------------|---------------------------|--------------------------------------------------|
| <b>Total residue number</b>                                    | 106                          | 117                       | 117:106                                          |
| <b>NMR constraints</b>                                         |                              |                           |                                                  |
| Distance restraints                                            |                              |                           |                                                  |
| Total NOE                                                      | 2298                         | 2766                      | 2671                                             |
| Intra-residue                                                  | 711                          | 961                       | 1111                                             |
| Inter-residue                                                  |                              |                           |                                                  |
| Sequential ( $ i-j  = 1$ )                                     | 530                          | 628                       | 531                                              |
| Medium-range ( $ i-j  \leq 4$ )                                | 466                          | 494                       | 346                                              |
| Long-range ( $ i-j  \geq 5$ )                                  | 591                          | 683                       | 508                                              |
| Intermolecular                                                 | N/A                          | N/A                       | 175                                              |
| Total dihedral angle restraints                                |                              |                           |                                                  |
| phi                                                            | 90                           | 98                        | 188                                              |
| psi                                                            | 90                           | 98                        | 188                                              |
| Total RDCs                                                     |                              |                           |                                                  |
| HN-N                                                           | 48                           | 57                        | 109                                              |
| CO-CA                                                          | 51                           | 58                        | 68                                               |
| CA-HA                                                          | 46                           | 50                        | 11                                               |
| Q (%) <sup>¶</sup>                                             | 30.4                         | 41.9                      | 32.5                                             |
| <b>Structure statistics</b>                                    |                              |                           |                                                  |
| Violations (mean $\pm$ SD)                                     |                              |                           |                                                  |
| Distance constraints ( $\text{\AA}$ )                          | 0.120 $\pm$ 0.094            | 0.099 $\pm$ 0.088         | 0.103 $\pm$ 0.088                                |
| Dihedral angle constraints ( $^\circ$ )                        | 1.205 $\pm$ 1.064            | 1.061 $\pm$ 0.865         | 1.176 $\pm$ 0.918                                |
| Max. dihedral angle violation ( $^\circ$ )                     | 4.193                        | 3.877                     | 4.407                                            |
| Max. distance restraint violation ( $\text{\AA}$ )             | 0.450                        | 0.451                     | 0.480                                            |
| Deviations from idealized geometry                             |                              |                           |                                                  |
| Bond lengths ( $\text{\AA}$ )                                  | 0.003                        | 0.003                     | 0.003                                            |
| Bond angles ( $^\circ$ )                                       | 0.528 $\pm$ 0.005            | 0.441 $\pm$ 0.008         | 0.445 $\pm$ 0.008                                |
| Impropers ( $^\circ$ )                                         | 0.467 $\pm$ 0.011            | 0.440 $\pm$ 0.015         | 0.430 $\pm$ 0.013                                |
| Average pairwise r.m.s.d. <sup>§</sup> * ( $\text{\AA}$ )      |                              |                           |                                                  |
| Heavy atoms                                                    | 1.06 $\pm$ 0.25              | 1.30 $\pm$ 0.32           | 1.64 $\pm$ 0.16                                  |
| Backbone atoms                                                 | 0.21 $\pm$ 0.07              | 0.49 $\pm$ 0.15           | 0.81 $\pm$ 0.18                                  |
| Ramachandran Plot Summary from<br>Richardson Lab's Molprobity* |                              |                           |                                                  |
| Most favored regions (%)                                       | 98.5 $\pm$ 0.8               | 96.7 $\pm$ 0.8            | 97.7 $\pm$ 0.8                                   |
| Allowed regions (%)                                            | 1.2 $\pm$ 0.8                | 2.6 $\pm$ 0.9             | 2.2 $\pm$ 0.7                                    |
| Disallowed regions (%)                                         | 0.1 $\pm$ 0.2                | 0.7 $\pm$ 0.6             | 0.1 $\pm$ 0.3                                    |
| Favored rotamers (%)                                           | 88.7 $\pm$ 1.9               | 92.4 $\pm$ 1.8            | 90.8 $\pm$ 1.7                                   |
| Poor rotamers (%)                                              | 6.6 $\pm$ 1.5                | 4.3 $\pm$ 1.5             | 4.8 $\pm$ 1.3                                    |

<sup>¶</sup>Q (%) is calculated using the average structure as input to "DC: Servers for Dipolar Coupling Calculations." (<http://spin.niddk.nih.gov/bax/nmrserver/dc/fit.html>)

<sup>§</sup>Non-flexible regions are used for r.m.s.d. calculation. KaiB<sub>fs-nmr</sub> (residues 9-98), CikA<sub>PsR</sub> (residues 615-692 and 702-724), CikA<sub>PsR</sub>:KaiB<sub>fs-nmr</sub> complex (residues 615-692 and 702-724:9-98).

\*Pairwise r.m.s.d. and Ramachandran statistics were calculated among 20 lowest energy structures. Please see fig. S1 and table S1 for more details.

**Table S4. HDX-MS deuterium uptake profile of KaiA<sub>AN</sub> free and bound to KaiB<sub>fs-cryst</sub>-CI<sub>cryst</sub> complex.**

| Peptide residues <sup>#</sup> |     | Deuterium uptake        |             |             |                                                                                |             |             |
|-------------------------------|-----|-------------------------|-------------|-------------|--------------------------------------------------------------------------------|-------------|-------------|
|                               |     | Free KaiA <sub>AN</sub> |             |             | KaiA <sub>AN</sub> bound to KaiB <sub>fs-cryst</sub> -KaiC CI <sub>cryst</sub> |             |             |
|                               |     | Start                   | End         | 10 sec      | 100 sec                                                                        | 1000 sec    | 10 sec      |
| 139                           | 159 | 13.81789826             | 17.26475761 | 17.52098749 | 10.07688224                                                                    | 13.49029432 | 15.76590238 |
| 139                           | 159 | 13.72123783             | 17.33740953 | 17.55168455 | 9.768155727                                                                    | 13.3996007  | 16.07466933 |
| 139                           | 161 | 14.46877912             | 18.89943235 | 19.16631365 | 9.525967974                                                                    | 14.14513259 | 17.85478268 |
| 169                           | 176 | 3.583107249             | 4.374315294 | 5.316333044 | 2.434258241                                                                    | 2.971906259 | 4.448038687 |
| 169                           | 176 | 3.560830754             | 4.378620832 | 5.327276714 | 2.541486362                                                                    | 3.314250173 | 4.59356447  |
| 170                           | 176 | 2.527111016             | 3.384804972 | 4.375910844 | 1.871624518                                                                    | 2.504393485 | 3.795756537 |
| 170                           | 176 | 2.495332819             | 3.407050239 | 4.320319925 | 1.921679843                                                                    | 2.533827084 | 3.882738617 |
| 177                           | 193 | 1.18859629              | 2.250459413 | 3.841352442 | 0.815642146                                                                    | 1.490605433 | 2.311517741 |
| 177                           | 193 | 1.358769705             | 2.256433321 | 3.876451723 | 0.840732463                                                                    | 1.666519402 | 2.458983776 |
| 177                           | 195 | 1.210955638             | 2.308848535 | 3.910844761 | 0.768696062                                                                    | 1.456431279 | 2.742425378 |
| 177                           | 199 | 0.952649027             | 2.026021142 | 3.637017577 | 0.654907112                                                                    | 1.35516357  | 2.61368612  |
| 178                           | 193 | 0.879760032             | 1.684146029 | 3.282693785 | 0.559242053                                                                    | 1.080678202 | 2.023210301 |
| 178                           | 193 | 0.927714741             | 1.607021929 | 3.236949336 | 0.59916912                                                                     | 1.076856286 | 1.972317535 |
| 178                           | 199 | 0.653544812             | 1.508599274 | 3.097681381 | 0.28138735                                                                     | 0.999076374 | 2.09618447  |
| 200                           | 203 | 0.026178261             | 0.064849558 | 0.228282583 | 0.021444807                                                                    | 0.033204862 | 0.134418935 |
| 200                           | 204 | 0.071906909             | 0.128000265 | 0.277682005 | 0.038191221                                                                    | 0.095378597 | 0.255602705 |
| 200                           | 213 | 8.062206349             | 9.477543161 | 9.743145523 | 7.389108591                                                                    | 9.246800976 | 9.46712695  |
| 202                           | 213 | 8.247799402             | 9.384034564 | 9.448235484 | 7.572680287                                                                    | 9.235645643 | 9.381813777 |
| 203                           | 209 | 4.266043241             | 5.22335405  | 5.226640485 | 3.592314015                                                                    | 4.935225754 | 5.167491488 |
| 203                           | 213 | 8.754071336             | 9.671695474 | 9.700919173 | 8.118793086                                                                    | 9.759141772 | 9.909756219 |
| 203                           | 217 | 9.288707549             | 11.28996709 | 11.93246839 | 8.454756612                                                                    | 11.09912345 | 11.88703629 |
| 204                           | 209 | 3.968989509             | 4.28708     | 4.255622193 | 3.66884202                                                                     | 4.084756287 | 4.117741505 |
| 204                           | 213 | 8.0191361               | 8.255935389 | 8.359103108 | 7.334408029                                                                    | 8.230884241 | 8.125740565 |
| 204                           | 213 | 8.102489565             | 8.415070884 | 8.457484967 | 7.444998527                                                                    | 8.296461418 | 8.25157506  |
| 205                           | 213 | 6.779704621             | 6.84186355  | 6.917860191 | 6.582768849                                                                    | 6.724794736 | 6.828307894 |
| 205                           | 213 | 7.032709173             | 7.119182719 | 7.167977337 | 6.661600253                                                                    | 7.040856275 | 7.054748831 |
| 205                           | 217 | 8.058015029             | 8.833450142 | 9.410797025 | 7.881984192                                                                    | 8.834520889 | 9.411867772 |
| 206                           | 217 | 6.817715763             | 7.698377318 | 8.346558488 | 6.736804565                                                                    | 7.650677603 | 8.355920114 |
| 208                           | 217 | 4.645576536             | 5.494450533 | 6.426245816 | 4.511013482                                                                    | 5.393458354 | 6.295066287 |
| 209                           | 217 | 3.58480328              | 4.502641267 | 5.225919419 | 3.445186415                                                                    | 4.395492103 | 5.213043954 |
| 218                           | 223 | 0.06865422              | 0.066046158 | 0.059849    | 0.035798016                                                                    | 0.036699729 | 0.043372408 |
| 218                           | 224 | 0.117647059             | 0.106592973 | 0.1091591   | 0.014607185                                                                    | 0.051125148 | 0.035333597 |
| 223                           | 233 | 1.175263343             | 2.307354431 | 4.27058547  | 1.096543802                                                                    | 1.803900843 | 3.621974311 |
| 224                           | 233 | 1.393951613             | 2.709879032 | 4.840725806 | 1.227721774                                                                    | 1.739112903 | 3.804737903 |
| 224                           | 233 | 1.323468418             | 2.600398867 | 4.869440278 | 1.11104705                                                                     | 1.803872904 | 3.804318407 |
| 224                           | 235 | 1.405256284             | 2.619512496 | 4.902343373 | 1.278732922                                                                    | 1.881205553 | 3.822845746 |
| 225                           | 231 | 1.090777852             | 2.110291538 | 4.067263622 | 0.965791905                                                                    | 1.546623165 | 3.204907817 |
| 225                           | 233 | 1.158705701             | 2.295497346 | 4.417907892 | 1.071819894                                                                    | 1.654939223 | 3.551189865 |

|     |     |              |              |              |              |             |              |
|-----|-----|--------------|--------------|--------------|--------------|-------------|--------------|
| 225 | 233 | 1.163073435  | 2.264581485  | 4.405859302  | 0.994880033  | 1.601118276 | 3.39212305   |
| 233 | 239 | 0.097222222  | 0.087896825  | 0.099404762  | 0.001785714  | 0.021428571 | 0.007539683  |
| 234 | 239 | 0.050078379  | 0.051221984  | 0.047322007  | 0.085384144  | 0.091900281 | 0.123623529  |
| 240 | 249 | 2.990044482  | 6.958695192  | 7.860622749  | 2.094895149  | 6.165431053 | 7.267951705  |
| 240 | 255 | 7.383823229  | 12.93016436  | 13.83601582  | 6.089852008  | 12.3310373  | 13.46937871  |
| 240 | 255 | 7.437679671  | 12.95107803  | 13.8835729   | 6.215554415  | 12.49075975 | 13.50734086  |
| 240 | 258 | 8.487508125  | 15.5687219   | 17.34810483  | 7.077154836  | 14.76018663 | 16.71470227  |
| 243 | 249 | 2.154279838  | 4.998532289  | 5.130563895  | 1.288166102  | 4.614516145 | 4.992964281  |
| 243 | 251 | 3.628518972  | 7.538963688  | 7.632190942  | 2.607915137  | 7.050999592 | 7.461852305  |
| 243 | 253 | 5.251436846  | 9.232969481  | 9.375116953  | 4.456293161  | 9.144553353 | 9.351459122  |
| 243 | 255 | 6.665271705  | 10.9338122   | 11.01053508  | 5.626420987  | 10.72998126 | 10.99816781  |
| 243 | 255 | 6.65070922   | 10.91206296  | 10.93772552  | 5.70461615   | 10.44192485 | 10.79401518  |
| 243 | 257 | 7.684557191  | 13.35370667  | 13.53418051  | 6.461160216  | 12.91344212 | 13.43406461  |
| 243 | 257 | 7.711561971  | 13.35716551  | 13.55944439  | 6.360974471  | 13.06103839 | 13.58205099  |
| 243 | 258 | 7.452642284  | 14.1811551   | 14.45755164  | 5.978609251  | 13.67107339 | 14.81397061  |
| 244 | 255 | 6.105401679  | 9.695241676  | 9.843965409  | 5.006893094  | 9.480511342 | 9.74641768   |
| 244 | 255 | 5.901445155  | 9.368633025  | 9.58747927   | 4.633084577  | 9.111288794 | 9.511075575  |
| 247 | 255 | 5.330779376  | 6.86459838   | 6.930980343  | 4.922156629  | 6.81909816  | 6.903724173  |
| 256 | 264 | 0.618307198  | 2.279949258  | 4.526552969  | 0.573841981  | 2.302194032 | 4.512009921  |
| 258 | 264 | 0.190712076  | 1.12368248   | 2.93415286   | 0.216418758  | 1.163199611 | 2.938741805  |
| 258 | 264 | 0.191640001  | 1.02242832   | 2.812269723  | 0.218737484  | 1.053686764 | 2.780585026  |
| 263 | 271 | 0.028570806  | 0.145985574  | 0.228103294  | 0.121838573  | 0.103392392 | 0.18528711   |
| 265 | 271 | 0.003019423  | 0.09737495   | 0.231894181  | 0.07678363   | 0.065775925 | 0.101565402  |
| 265 | 273 | 0.02005695   | 0.022922228  | 0.036252002  | 0.042231714  | 0.000249155 | 0.022299342  |
| 265 | 273 | 0.007790063  | 0.005025847  | 0.00427197   | 0.009046525  | 0.014574957 | 0.056540781  |
| 265 | 274 | -0.002407633 | -0.002407633 | -0.000723625 | -0.002407633 | 0.003598734 | -0.001927124 |
| 268 | 273 | 0.067465487  | 0.099605883  | 0.126520313  | 0.002303055  | 0.039648316 | 0.088608095  |
| 275 | 283 | 2.13264115   | 3.531455428  | 5.162775696  | 1.495300117  | 2.679762856 | 3.939792345  |

#Residues 139-146 is FLAG tag insertion on KaiA<sub>ΔN</sub>.

**Table S5. HDX-MS difference profile between KaiA<sub>ΔN</sub> free and bound to KaiB<sub>fs-cryst</sub>-CI<sub>cryst</sub> complex.**

| Residue number <sup>#</sup> | Difference in number of deuteron (bound – free) <sup>¶</sup> |         |          |
|-----------------------------|--------------------------------------------------------------|---------|----------|
|                             | 10 sec                                                       | 100 sec | 1000 sec |
| 141                         | -0.234                                                       | -0.238  | -0.066   |
| 142                         | -0.234                                                       | -0.238  | -0.066   |
| 143                         | -0.234                                                       | -0.238  | -0.066   |
| 144                         | -0.234                                                       | -0.238  | -0.066   |
| 145                         | -0.234                                                       | -0.238  | -0.066   |
| 146                         | -0.234                                                       | -0.238  | -0.066   |
| 147                         | -0.234                                                       | -0.238  | -0.066   |
| 148                         | -0.234                                                       | -0.238  | -0.066   |
| 149                         | -0.234                                                       | -0.238  | -0.066   |
| 150                         | -0.234                                                       | -0.238  | -0.066   |
| 152                         | -0.234                                                       | -0.238  | -0.066   |
| 153                         | -0.234                                                       | -0.238  | -0.066   |
| 154                         | -0.234                                                       | -0.238  | -0.066   |
| 155                         | -0.234                                                       | -0.238  | -0.066   |
| 156                         | -0.234                                                       | -0.238  | -0.066   |
| 157                         | -0.234                                                       | -0.238  | -0.066   |
| 158                         | -0.234                                                       | -0.238  | -0.066   |
| 159                         | -0.234                                                       | -0.238  | -0.066   |
| 160                         | -0.234                                                       | -0.238  | -0.066   |
| 161                         | -0.234                                                       | -0.238  | -0.066   |
| 171                         | -0.175                                                       | -0.208  | -0.137   |
| 172                         | -0.175                                                       | -0.208  | -0.137   |
| 173                         | -0.175                                                       | -0.208  | -0.137   |
| 174                         | -0.175                                                       | -0.208  | -0.137   |
| 175                         | -0.175                                                       | -0.208  | -0.137   |
| 176                         | -0.175                                                       | -0.208  | -0.137   |
| 179                         | -0.029                                                       | -0.051  | -0.100   |
| 180                         | -0.029                                                       | -0.051  | -0.100   |
| 181                         | -0.029                                                       | -0.051  | -0.100   |
| 182                         | -0.029                                                       | -0.051  | -0.100   |
| 184                         | -0.029                                                       | -0.051  | -0.100   |
| 185                         | -0.029                                                       | -0.051  | -0.100   |
| 186                         | -0.029                                                       | -0.051  | -0.100   |
| 187                         | -0.029                                                       | -0.051  | -0.100   |
| 188                         | -0.029                                                       | -0.051  | -0.100   |
| 189                         | -0.029                                                       | -0.051  | -0.100   |
| 190                         | -0.029                                                       | -0.051  | -0.100   |
| 191                         | -0.029                                                       | -0.051  | -0.100   |

|     |        |        |        |
|-----|--------|--------|--------|
| 192 | -0.029 | -0.051 | -0.100 |
| 193 | -0.029 | -0.051 | -0.100 |
| 194 | 0.000  | 0.000  | 0.037  |
| 195 | 0.000  | 0.000  | 0.037  |
| 196 | 0.000  | 0.000  | 0.037  |
| 197 | 0.000  | 0.000  | 0.037  |
| 198 | 0.000  | 0.000  | 0.037  |
| 199 | 0.000  | 0.000  | 0.037  |
| 202 | -0.104 | -0.028 | -0.030 |
| 203 | -0.104 | -0.028 | -0.030 |
| 204 | -0.104 | -0.028 | -0.030 |
| 205 | -0.104 | -0.028 | -0.030 |
| 206 | -0.104 | -0.028 | -0.030 |
| 207 | -0.015 | -0.008 | -0.004 |
| 208 | -0.015 | -0.008 | -0.004 |
| 209 | -0.015 | -0.008 | -0.004 |
| 210 | -0.015 | -0.008 | -0.004 |
| 211 | -0.015 | -0.008 | -0.004 |
| 212 | -0.015 | -0.008 | -0.004 |
| 213 | -0.015 | -0.008 | -0.004 |
| 214 | -0.015 | -0.008 | -0.004 |
| 215 | -0.015 | -0.008 | -0.004 |
| 216 | -0.015 | -0.008 | -0.004 |
| 217 | -0.015 | -0.008 | -0.004 |
| 220 | -0.018 | -0.012 | -0.012 |
| 221 | -0.018 | -0.012 | -0.012 |
| 222 | -0.018 | -0.012 | -0.012 |
| 223 | -0.018 | -0.012 | -0.012 |
| 224 | -0.018 | -0.012 | -0.012 |
| 225 | -0.020 | -0.091 | -0.117 |
| 226 | -0.020 | -0.091 | -0.117 |
| 227 | -0.020 | -0.091 | -0.117 |
| 228 | -0.020 | -0.091 | -0.117 |
| 229 | -0.020 | -0.091 | -0.117 |
| 230 | -0.020 | -0.091 | -0.117 |
| 231 | -0.020 | -0.091 | -0.117 |
| 232 | 0.001  | -0.008 | -0.021 |
| 233 | 0.001  | -0.008 | -0.021 |
| 234 | 0.001  | -0.008 | -0.021 |
| 235 | 0.001  | -0.008 | -0.021 |
| 236 | 0.001  | -0.008 | -0.021 |
| 237 | 0.001  | -0.008 | -0.021 |
| 238 | 0.001  | -0.008 | -0.021 |

|     |        |        |        |
|-----|--------|--------|--------|
| 239 | 0.001  | -0.008 | -0.021 |
| 242 | -0.101 | -0.074 | -0.070 |
| 243 | -0.101 | -0.074 | -0.070 |
| 244 | -0.101 | -0.074 | -0.070 |
| 245 | -0.101 | -0.074 | -0.070 |
| 246 | -0.101 | -0.074 | -0.070 |
| 247 | -0.101 | -0.074 | -0.070 |
| 248 | -0.101 | -0.074 | -0.070 |
| 249 | -0.042 | -0.002 | 0.000  |
| 250 | -0.042 | -0.002 | 0.000  |
| 251 | -0.042 | -0.002 | 0.000  |
| 252 | -0.042 | -0.002 | 0.000  |
| 253 | -0.042 | -0.002 | 0.000  |
| 254 | -0.108 | -0.058 | 0.000  |
| 255 | -0.108 | -0.058 | 0.000  |
| 256 | -0.108 | -0.058 | 0.000  |
| 257 | -0.108 | -0.058 | 0.000  |
| 258 | -0.108 | -0.058 | 0.000  |
| 259 | -0.007 | 0.013  | -0.002 |
| 260 | -0.007 | 0.013  | -0.002 |
| 261 | -0.007 | 0.013  | -0.002 |
| 262 | -0.007 | 0.013  | -0.002 |
| 263 | -0.007 | 0.013  | -0.002 |
| 264 | -0.007 | 0.013  | -0.002 |
| 265 | 0.018  | 0.000  | -0.002 |
| 266 | 0.018  | 0.000  | -0.002 |
| 267 | 0.018  | 0.000  | -0.002 |
| 268 | 0.018  | 0.000  | -0.002 |
| 269 | 0.018  | 0.000  | -0.002 |
| 270 | -0.004 | -0.010 | -0.010 |
| 271 | -0.004 | -0.010 | -0.010 |
| 272 | -0.004 | -0.010 | -0.010 |
| 273 | -0.004 | -0.010 | -0.010 |
| 274 | -0.004 | -0.010 | -0.010 |
| 277 | -0.107 | -0.142 | -0.203 |
| 278 | -0.107 | -0.142 | -0.203 |
| 279 | -0.107 | -0.142 | -0.203 |
| 281 | -0.107 | -0.142 | -0.203 |
| 282 | -0.107 | -0.142 | -0.203 |
| 283 | -0.107 | -0.142 | -0.203 |

---

<sup>#</sup>Residues 139-146 is FLAG tag insertion on KaiA<sub>ΔN</sub>.

<sup>¶</sup>Sub-localized exchange level was analyzed as described previously (68).

**Table S6. HDX-MS deuterium uptake profile of KaiB<sub>fs-cryst</sub>-CI<sub>cryst</sub> complex with and without KaiA<sub>ΔN</sub>.**

| Peptide residues<br>of KaiB <sub>fs-cryst</sub> <sup>#</sup> |     | Deuterium uptake                                                                      |             |             |                                                                                    |             |             |
|--------------------------------------------------------------|-----|---------------------------------------------------------------------------------------|-------------|-------------|------------------------------------------------------------------------------------|-------------|-------------|
|                                                              |     | KaiB <sub>fs-cryst</sub> -KaiC CI <sub>cryst</sub> complex without KaiA <sub>ΔN</sub> |             |             | KaiB <sub>fs-cryst</sub> -KaiC CI <sub>cryst</sub> complex with KaiA <sub>ΔN</sub> |             |             |
| Start                                                        | End | 10 sec                                                                                | 100 sec     | 1000 sec    | 10 sec                                                                             | 100 sec     | 1000 sec    |
| 1                                                            | 9   | 4.325397337                                                                           | 5.210385551 | 5.850849827 | 4.127490775                                                                        | 4.715578739 | 5.470383164 |
| 1                                                            | 9   | 4.315906858                                                                           | 5.336473748 | 5.992348864 | 4.172364496                                                                        | 4.786205141 | 5.554580146 |
| 1                                                            | 12  | 4.021731375                                                                           | 4.852208871 | 5.57342795  | 3.778567655                                                                        | 4.418840532 | 5.09834258  |
| 1                                                            | 12  | 3.976619147                                                                           | 4.800348059 | 5.58152822  | 3.668023173                                                                        | 4.374665107 | 5.156315649 |
| 11                                                           | 32  | 1.218769137                                                                           | 3.013112039 | 6.790166051 | 1.245495017                                                                        | 2.92446732  | 6.725582199 |
| 11                                                           | 40  | 3.622703378                                                                           | 8.124843953 | 14.41411185 | 3.397601676                                                                        | 6.692547297 | 13.08064192 |
| 13                                                           | 24  | 2.194494806                                                                           | 3.775504897 | 6.894335089 | 2.168163593                                                                        | 3.762289849 | 6.842225639 |
| 13                                                           | 32  | 1.259595727                                                                           | 3.177667545 | 7.081369805 | 1.179674025                                                                        | 3.09511419  | 7.001209832 |
| 13                                                           | 32  | 1.202115104                                                                           | 3.079073552 | 7.115730387 | 1.160309821                                                                        | 2.982391039 | 7.094305058 |
| 13                                                           | 33  | 1.299486393                                                                           | 3.296227997 | 8.051488282 | 1.20939079                                                                         | 3.209364658 | 7.979965914 |
| 13                                                           | 40  | 3.562467414                                                                           | 8.138233352 | 14.36855845 | 3.104191122                                                                        | 6.561724406 | 12.95944617 |
| 13                                                           | 41  | 3.766935373                                                                           | 8.742659438 | 15.40213253 | 3.552277669                                                                        | 6.911543809 | 13.60818975 |
| 13                                                           | 42  | 4.194025996                                                                           | 9.692712114 | 16.40971517 | 3.80682251                                                                         | 7.624396319 | 14.44001243 |
| 33                                                           | 40  | 2.17271224                                                                            | 3.423084145 | 5.313278077 | 1.998974482                                                                        | 3.050576824 | 4.80185532  |
| 41                                                           | 46  | 1.05182995                                                                            | 1.723569133 | 1.998383618 | 0.705296392                                                                        | 1.09796282  | 1.642578134 |
| 41                                                           | 53  | 1.548357807                                                                           | 3.501372579 | 5.557524117 | 1.019646136                                                                        | 2.580750385 | 4.663251005 |
| 41                                                           | 53  | 1.625177659                                                                           | 3.656565987 | 5.780554119 | 0.983690732                                                                        | 2.602830063 | 4.761466353 |
| 41                                                           | 55  | 1.685795908                                                                           | 4.18036763  | 7.292804183 | 0.964360897                                                                        | 2.802083973 | 6.078417857 |
| 42                                                           | 53  | 1.470554607                                                                           | 3.396480163 | 5.501071358 | 0.900117534                                                                        | 2.241587951 | 4.145398947 |
| 43                                                           | 53  | 1.269923058                                                                           | 2.56901724  | 4.164912061 | 0.698168792                                                                        | 1.563515657 | 3.295933373 |
| 45                                                           | 53  | 0.849346644                                                                           | 2.11891552  | 3.650032555 | 0.596661795                                                                        | 1.327482163 | 2.883253623 |
| 47                                                           | 53  | 0.762464908                                                                           | 2.074394871 | 3.907221737 | 0.434891263                                                                        | 1.257615481 | 2.927046891 |
| 47                                                           | 53  | 0.825676272                                                                           | 2.156632893 | 3.979840909 | 0.567833403                                                                        | 1.518190353 | 3.051833884 |
| 54                                                           | 65  | 1.166066304                                                                           | 3.441041753 | 5.185862302 | 0.809828353                                                                        | 2.370005344 | 3.895661059 |
| 57                                                           | 65  | 0.864889683                                                                           | 2.475817239 | 3.276551461 | 0.528427012                                                                        | 1.833196834 | 2.542154479 |
| 63                                                           | 89  | 3.910343071                                                                           | 8.500145141 | 12.29239714 | 3.837291788                                                                        | 8.358981448 | 12.23366589 |
| 66                                                           | 87  | 3.326820218                                                                           | 7.930183561 | 12.00097658 | 3.298457793                                                                        | 7.759850408 | 11.92587791 |
| 66                                                           | 87  | 3.484642953                                                                           | 7.982871732 | 11.68500932 | 3.36148486                                                                         | 7.825926922 | 11.55993817 |
| 66                                                           | 89  | 3.74553562                                                                            | 8.265382959 | 11.84920116 | 3.676654847                                                                        | 8.060648525 | 11.76812784 |
| 93                                                           | 106 | 9.96511625                                                                            | 11.6189459  | 12.70363391 | 9.939350697                                                                        | 11.51599241 | 12.1443236  |
| 93                                                           | 106 | 10.16271963                                                                           | 11.58150805 | 12.76614184 | 10.19606201                                                                        | 11.73015225 | 12.54420464 |
| 95                                                           | 106 | 7.930833791                                                                           | 9.29493882  | 10.07574206 | 8.015446383                                                                        | 9.30687506  | 10.19069604 |
| 96                                                           | 106 | 7.83856633                                                                            | 8.719861455 | 9.146675513 | 7.900298625                                                                        | 8.828250017 | 9.190754989 |
| 97                                                           | 106 | 6.509807142                                                                           | 7.310494631 | 8.162434245 | 6.362084598                                                                        | 7.323511085 | 8.198399797 |
| 99                                                           | 106 | 4.27058273                                                                            | 5.413327037 | 6.134663652 | 4.265191043                                                                        | 5.371220063 | 6.080559559 |
| 100                                                          | 106 | 2.694160142                                                                           | 3.929688831 | 4.700635552 | 2.698624157                                                                        | 3.955052357 | 4.708672533 |

<sup>#</sup>Residues 99-106 is FLAG tag insertion on KaiB<sub>fs-cryst</sub>.

**Table S7. HDX-MS difference profile between KaiB<sub>fs-cryst</sub>-CI<sub>cryst</sub> complex with and without KaiA<sub>ΔN</sub>.**

| Residue number<br>of KaiB <sub>fs-cryst</sub> <sup>#</sup> | Difference in number of deuteron (with KaiA <sub>ΔN</sub> – without KaiA <sub>ΔN</sub> ) <sup>¶</sup> |         |          |
|------------------------------------------------------------|-------------------------------------------------------------------------------------------------------|---------|----------|
|                                                            | 10 sec                                                                                                | 100 sec | 1000 sec |
| 4                                                          | -0.037                                                                                                | -0.080  | -0.072   |
| 5                                                          | -0.037                                                                                                | -0.080  | -0.072   |
| 6                                                          | -0.037                                                                                                | -0.080  | -0.072   |
| 7                                                          | -0.037                                                                                                | -0.080  | -0.072   |
| 8                                                          | -0.037                                                                                                | -0.080  | -0.072   |
| 9                                                          | -0.037                                                                                                | -0.080  | -0.072   |
| 10                                                         | 0.000                                                                                                 | 0.000   | 0.000    |
| 11                                                         | 0.000                                                                                                 | 0.000   | 0.000    |
| 12                                                         | 0.000                                                                                                 | 0.000   | 0.000    |
| 13                                                         | 0.000                                                                                                 | 0.000   | 0.000    |
| 14                                                         | 0.000                                                                                                 | 0.000   | 0.000    |
| 15                                                         | -0.007                                                                                                | -0.008  | -0.006   |
| 16                                                         | -0.007                                                                                                | -0.008  | -0.006   |
| 17                                                         | -0.007                                                                                                | -0.008  | -0.006   |
| 18                                                         | -0.007                                                                                                | -0.008  | -0.006   |
| 20                                                         | -0.007                                                                                                | -0.008  | -0.006   |
| 21                                                         | -0.007                                                                                                | -0.008  | -0.006   |
| 22                                                         | -0.007                                                                                                | -0.008  | -0.006   |
| 23                                                         | -0.007                                                                                                | -0.008  | -0.006   |
| 24                                                         | -0.007                                                                                                | -0.008  | -0.006   |
| 25                                                         | 0.000                                                                                                 | 0.000   | -0.004   |
| 26                                                         | 0.000                                                                                                 | 0.000   | -0.004   |
| 27                                                         | 0.000                                                                                                 | 0.000   | -0.004   |
| 28                                                         | 0.000                                                                                                 | 0.000   | -0.004   |
| 29                                                         | 0.000                                                                                                 | 0.000   | -0.004   |
| 30                                                         | 0.000                                                                                                 | 0.000   | -0.004   |
| 31                                                         | 0.000                                                                                                 | 0.000   | -0.004   |
| 32                                                         | 0.000                                                                                                 | 0.000   | -0.004   |
| 33                                                         | -0.031                                                                                                | -0.169  | -0.156   |
| 34                                                         | -0.031                                                                                                | -0.169  | -0.156   |
| 35                                                         | -0.031                                                                                                | -0.169  | -0.156   |
| 36                                                         | -0.031                                                                                                | -0.169  | -0.156   |
| 37                                                         | -0.031                                                                                                | -0.169  | -0.156   |
| 38                                                         | -0.031                                                                                                | -0.169  | -0.156   |
| 39                                                         | -0.031                                                                                                | -0.169  | -0.156   |
| 40                                                         | -0.031                                                                                                | -0.169  | -0.156   |
| 41                                                         | -0.070                                                                                                | -0.177  | -0.135   |
| 42                                                         | -0.070                                                                                                | -0.177  | -0.135   |



|    |        |        |        |
|----|--------|--------|--------|
| 43 | -0.070 | -0.177 | -0.135 |
| 44 | -0.070 | -0.177 | -0.135 |
| 45 | -0.070 | -0.177 | -0.135 |
| 46 | -0.070 | -0.177 | -0.135 |
| 47 | -0.047 | -0.115 | -0.140 |
| 48 | -0.047 | -0.115 | -0.140 |
| 49 | -0.047 | -0.115 | -0.140 |
| 50 | -0.047 | -0.115 | -0.140 |
| 52 | -0.047 | -0.115 | -0.140 |
| 53 | -0.047 | -0.115 | -0.140 |
| 54 | -0.008 | -0.142 | -0.148 |
| 55 | -0.008 | -0.142 | -0.148 |
| 56 | -0.008 | -0.142 | -0.148 |
| 57 | -0.008 | -0.142 | -0.148 |
| 58 | -0.008 | -0.142 | -0.148 |
| 59 | -0.058 | -0.128 | -0.146 |
| 60 | -0.058 | -0.128 | -0.146 |
| 61 | -0.058 | -0.128 | -0.146 |
| 62 | -0.058 | -0.128 | -0.146 |
| 64 | -0.058 | -0.128 | -0.146 |
| 65 | -0.003 | -0.006 | -0.003 |
| 66 | -0.003 | -0.006 | -0.003 |
| 67 | -0.003 | -0.006 | -0.003 |
| 68 | -0.003 | -0.006 | -0.003 |
| 69 | -0.003 | -0.006 | -0.003 |
| 73 | -0.003 | -0.006 | -0.003 |
| 74 | -0.003 | -0.006 | -0.003 |
| 75 | -0.003 | -0.006 | -0.003 |
| 76 | -0.003 | -0.006 | -0.003 |
| 77 | -0.003 | -0.006 | -0.003 |
| 78 | -0.003 | -0.006 | -0.003 |
| 79 | -0.003 | -0.006 | -0.003 |
| 80 | -0.003 | -0.006 | -0.003 |
| 81 | -0.003 | -0.006 | -0.003 |
| 82 | -0.003 | -0.006 | -0.003 |
| 83 | -0.003 | -0.006 | -0.003 |
| 84 | -0.003 | -0.006 | -0.003 |
| 85 | -0.003 | -0.006 | -0.003 |
| 86 | -0.003 | -0.006 | -0.003 |
| 87 | -0.003 | -0.006 | -0.003 |
| 88 | -0.003 | -0.006 | -0.003 |
| 89 | -0.003 | -0.006 | -0.003 |
| 95 | 0.008  | 0.000  | 0.000  |

|     |        |       |       |
|-----|--------|-------|-------|
| 96  | 0.008  | 0.000 | 0.000 |
| 97  | 0.008  | 0.000 | 0.000 |
| 98  | 0.008  | 0.000 | 0.000 |
| 99  | 0.008  | 0.000 | 0.000 |
| 100 | 0.008  | 0.000 | 0.000 |
| 101 | -0.003 | 0.003 | 0.000 |
| 102 | -0.003 | 0.003 | 0.000 |
| 103 | -0.003 | 0.003 | 0.000 |
| 104 | -0.003 | 0.003 | 0.000 |
| 105 | -0.003 | 0.003 | 0.000 |
| 106 | -0.003 | 0.003 | 0.000 |

---

#Residues 99-106 is FLAG tag insertion on KaiB<sub>fs-cryst</sub>.

¶Sub-localized exchange level was analyzed as described previously (68).

**Table S8. HDX-MS deuterium uptake profile of KaiB<sub>fs-nmr</sub> free and bound to CikA<sub>PsR</sub>.**

| Peptide residues <sup>#</sup> |     | Deuterium uptake            |             |             |                                                     |             |             |
|-------------------------------|-----|-----------------------------|-------------|-------------|-----------------------------------------------------|-------------|-------------|
|                               |     | Free KaiB <sub>fs-nmr</sub> |             |             | KaiB <sub>fs-nmr</sub> bound to CikA <sub>PsR</sub> |             |             |
| Start                         | End | 10 sec                      | 100 sec     | 1000 sec    | 10 sec                                              | 100 sec     | 1000 sec    |
| 7                             | 12  | 0.041427678                 | 0.094911817 | 0.46612337  | 0.363030184                                         | 0.999787486 | 1.068320095 |
| 7                             | 12  | 0.035104947                 | 0.080706823 | 0.444075163 | 0.398847126                                         | 0.990550949 | 1.068564499 |
| 7                             | 32  | 3.013152048                 | 6.364816689 | 10.33551495 | 2.73564996                                          | 5.711523115 | 9.227485531 |
| 8                             | 12  | 0.038257007                 | 0.099714531 | 0.386848477 | 0.169545115                                         | 0.596000977 | 0.71839449  |
| 11                            | 24  | 3.658285902                 | 6.412843395 | 8.614620076 | 3.604798941                                         | 6.365156108 | 8.577406943 |
| 11                            | 27  | 3.550830244                 | 6.404541963 | 9.062164694 | 3.214218284                                         | 5.956265211 | 8.453419955 |
| 11                            | 29  | 3.25242483                  | 5.870889796 | 8.847956899 | 2.791936421                                         | 5.373874055 | 7.858569972 |
| 11                            | 32  | 3.036576242                 | 6.359246515 | 10.27665627 | 2.326521839                                         | 5.13326905  | 8.500642493 |
| 11                            | 32  | 2.944387679                 | 6.306325105 | 10.22808155 | 2.294786834                                         | 5.09418736  | 8.349726107 |
| 11                            | 33  | 3.131476434                 | 6.693915757 | 11.3069616  | 2.417703319                                         | 5.076156347 | 8.865451175 |
| 11                            | 40  | 6.305585047                 | 12.45097052 | 17.82433597 | 3.17868338                                          | 8.358595424 | 14.34047313 |
| 11                            | 40  | 6.325219824                 | 12.43119546 | 17.80540885 | 3.154074227                                         | 8.314518715 | 14.33217383 |
| 11                            | 40  | 6.325871371                 | 12.4653491  | 17.78982326 | 3.139949482                                         | 8.309858064 | 14.29410126 |
| 11                            | 41  | 6.486073155                 | 12.54186932 | 18.06775252 | 3.262850381                                         | 8.445569052 | 14.83801197 |
| 11                            | 42  | 6.765527593                 | 13.46455156 | 19.3370279  | 3.498279105                                         | 8.758732513 | 15.41399996 |
| 11                            | 46  | 7.165163504                 | 14.91749879 | 21.13142047 | 3.378149619                                         | 9.131994353 | 15.96049872 |
| 11                            | 46  | 7.232421551                 | 15.00910611 | 21.15275733 | 3.347314271                                         | 9.026881288 | 16.3271977  |
| 11                            | 46  | 7.251613227                 | 14.7375019  | 21.39158493 | 3.186763817                                         | 8.869263007 | 16.33074189 |
| 11                            | 46  | 7.198071065                 | 14.84640525 | 20.97501651 | 3.258060496                                         | 9.031509873 | 16.15716664 |
| 11                            | 53  | 9.309007063                 | 18.63191771 | 24.87188569 | 4.633959053                                         | 11.89227338 | 20.08384386 |
| 11                            | 53  | 9.302428265                 | 18.66780099 | 24.84624763 | 4.536695062                                         | 11.86485779 | 20.14718201 |
| 11                            | 53  | 9.402419943                 | 18.64894722 | 24.86081379 | 4.541124067                                         | 11.88306128 | 20.13210439 |
| 12                            | 43  | 6.771435482                 | 13.53160941 | 19.07680399 | 3.48443018                                          | 8.723969974 | 15.43561213 |
| 13                            | 21  | 3.590479855                 | 5.310674149 | 5.93315181  | 3.579401451                                         | 5.30530999  | 5.897021972 |
| 13                            | 24  | 3.987329995                 | 6.58751952  | 8.633504028 | 3.888645239                                         | 6.483269294 | 8.632291619 |
| 13                            | 27  | 3.665203802                 | 6.579516307 | 9.216293394 | 3.237617954                                         | 5.892365743 | 8.720079707 |
| 13                            | 30  | 3.522017679                 | 7.028843375 | 9.930149201 | 3.000633097                                         | 5.889220023 | 8.87377338  |
| 13                            | 31  | 3.246229786                 | 6.795414443 | 10.50594234 | 2.536286444                                         | 5.255975834 | 8.533804769 |
| 13                            | 32  | 3.003446387                 | 6.438074211 | 10.3670571  | 2.423920501                                         | 5.121661853 | 8.471158354 |
| 13                            | 33  | 3.041932753                 | 6.862299815 | 11.20001042 | 2.416280613                                         | 5.184299654 | 8.777390401 |
| 13                            | 33  | 3.045427728                 | 6.873249774 | 11.30301618 | 2.448823588                                         | 5.157289552 | 8.823348825 |
| 13                            | 35  | 4.101607396                 | 8.630468068 | 13.06041177 | 2.603233152                                         | 6.333694195 | 10.46599631 |
| 13                            | 40  | 6.411200822                 | 12.56634182 | 17.75661773 | 3.214917641                                         | 8.307248555 | 14.05851333 |
| 13                            | 40  | 6.269118518                 | 12.43857063 | 17.78973717 | 3.073298273                                         | 8.270377242 | 14.22846421 |
| 13                            | 41  | 6.47928756                  | 12.7377699  | 18.3799646  | 3.229479998                                         | 8.484492009 | 14.50750764 |
| 13                            | 41  | 6.406796379                 | 12.64748369 | 18.33097733 | 3.219634911                                         | 8.36711477  | 14.3890799  |
| 13                            | 42  | 6.645861199                 | 13.45611166 | 19.28728011 | 3.178385719                                         | 8.508438165 | 15.08198947 |

|    |    |             |             |             |             |             |             |
|----|----|-------------|-------------|-------------|-------------|-------------|-------------|
| 13 | 44 | 6.828065498 | 14.32008392 | 20.47773511 | 3.227900821 | 8.608704692 | 15.63119469 |
| 13 | 44 | 6.853591032 | 14.25926238 | 20.33845582 | 3.274109121 | 8.542883152 | 15.66511376 |
| 13 | 46 | 7.238659731 | 14.92662993 | 21.175948   | 3.312360469 | 8.931535953 | 16.36561104 |
| 13 | 46 | 7.221342093 | 14.86791689 | 21.17790556 | 3.319273599 | 8.942420201 | 16.30904039 |
| 13 | 46 | 7.240292069 | 14.82309715 | 21.23545495 | 3.336904817 | 8.937682136 | 16.38178339 |
| 13 | 53 | 9.328870663 | 18.57034226 | 24.8539857  | 4.583295775 | 11.84088713 | 20.02263784 |
| 13 | 53 | 9.317521664 | 18.55213311 | 24.85136078 | 4.644704324 | 11.76121401 | 20.05682509 |
| 13 | 53 | 9.297142139 | 18.53188582 | 24.80902191 | 4.638583644 | 11.78401287 | 19.97240487 |
| 22 | 32 | 0.480062725 | 1.486652369 | 3.257081133 | 0.045786835 | 0.599765165 | 1.444158635 |
| 23 | 32 | 0.517001593 | 1.182203158 | 2.574914047 | 0.076794737 | 0.263436014 | 0.951978736 |
| 23 | 40 | 4.242381106 | 7.872913053 | 10.69831552 | 1.417639866 | 4.222848103 | 7.445718089 |
| 25 | 32 | 0.31358323  | 1.085278703 | 2.277792892 | 0.018345674 | 0.222719729 | 0.92111116  |
| 25 | 32 | 0.437517438 | 1.097223621 | 2.259462366 | 0.002383435 | 0.226856672 | 1.028193628 |
| 25 | 40 | 4.287916309 | 8.021851073 | 10.3945062  | 1.402984555 | 4.187651511 | 7.396487166 |
| 25 | 40 | 4.167822377 | 7.577792066 | 10.32729862 | 1.37434035  | 4.266520624 | 7.475412172 |
| 25 | 40 | 4.366253979 | 7.968918104 | 10.55992209 | 1.068254023 | 4.038238991 | 7.130614498 |
| 28 | 40 | 4.021293717 | 7.303699866 | 9.171530509 | 1.262753323 | 3.949266713 | 6.876113564 |
| 30 | 40 | 3.708304486 | 6.337461447 | 7.745806207 | 1.313528523 | 3.537861963 | 5.638247489 |
| 30 | 42 | 4.052434603 | 7.358270778 | 9.241385615 | 1.300402666 | 3.947881669 | 6.902354079 |
| 30 | 46 | 4.88244266  | 9.087859997 | 11.22804269 | 1.4363987   | 4.551708266 | 8.452043647 |
| 30 | 53 | 6.917565422 | 12.58443334 | 14.77916152 | 2.980369305 | 7.605303746 | 12.21460381 |
| 31 | 40 | 3.962748075 | 6.434757738 | 7.845325198 | 1.503443734 | 3.832978473 | 6.19096698  |
| 32 | 40 | 3.84713248  | 5.699545924 | 6.727934197 | 1.105974433 | 3.211977921 | 5.495274877 |
| 33 | 40 | 2.998688821 | 4.842287228 | 5.845978491 | 1.152689083 | 2.92711627  | 4.720410717 |
| 33 | 40 | 3.011212687 | 4.755688179 | 5.776998437 | 1.296948139 | 3.009875077 | 4.77552394  |
| 33 | 41 | 3.055117115 | 4.82867103  | 6.211315602 | 1.356347366 | 3.034958031 | 4.794429557 |
| 33 | 42 | 3.322800001 | 5.724880328 | 7.239690615 | 1.152350192 | 2.885068652 | 5.522536561 |
| 33 | 42 | 3.177215052 | 5.730441922 | 7.131328503 | 1.214418471 | 2.954315876 | 5.549881212 |
| 33 | 44 | 3.169502462 | 6.185713126 | 7.944094901 | 0.522107801 | 2.601361351 | 5.433288304 |
| 33 | 44 | 3.041867315 | 6.128202669 | 7.875233753 | 0.657956038 | 2.622454602 | 5.25132613  |
| 33 | 46 | 3.662834864 | 6.859591504 | 8.679535008 | 1.400785712 | 3.373201999 | 6.287639962 |
| 33 | 47 | 3.518501629 | 6.640911666 | 8.662588536 | 1.10405857  | 2.871903033 | 6.188068736 |
| 33 | 47 | 3.4480874   | 6.811863881 | 8.540931702 | 1.090847009 | 2.762799335 | 6.0125405   |
| 33 | 53 | 5.591622651 | 10.34607616 | 12.1709178  | 2.549738621 | 5.999325671 | 9.968957361 |
| 33 | 53 | 5.549873785 | 10.29140145 | 12.10549802 | 2.437868263 | 5.982264363 | 9.81898563  |
| 33 | 53 | 5.518227832 | 10.25364014 | 12.09693881 | 2.460495641 | 5.9113114   | 9.89305075  |
| 34 | 40 | 2.365094079 | 3.871874253 | 4.813515292 | 0.831617607 | 2.190167219 | 3.782773046 |
| 34 | 40 | 2.345414984 | 3.934486688 | 4.792951591 | 0.967841524 | 2.328456802 | 3.916044876 |
| 34 | 42 | 2.725360945 | 4.839830225 | 6.319573849 | 1.080937708 | 2.469976632 | 4.688339619 |
| 34 | 46 | 3.331796383 | 6.242293724 | 7.928252281 | 1.07914796  | 2.826703169 | 5.717921586 |
| 34 | 46 | 3.233891068 | 6.358257483 | 7.944843035 | 1.092855301 | 2.78324034  | 5.672332268 |
| 36 | 46 | 2.267738203 | 4.617517102 | 6.147201754 | 0.658640278 | 1.827300901 | 4.075382938 |
| 41 | 46 | 0.990374644 | 1.76767243  | 2.061557742 | 0.112742173 | 0.641739223 | 1.418098843 |

|    |    |             |             |             |              |             |             |
|----|----|-------------|-------------|-------------|--------------|-------------|-------------|
| 41 | 46 | 0.976877829 | 1.985353005 | 2.264833872 | 0.238284921  | 0.835450877 | 1.470414447 |
| 41 | 47 | 0.890841807 | 1.627240366 | 1.948287515 | 0.131928932  | 0.665297221 | 1.352334192 |
| 41 | 47 | 0.899185956 | 1.606458784 | 1.988375123 | 0.060391418  | 0.736968832 | 1.189654084 |
| 41 | 53 | 2.993260942 | 5.235772105 | 5.71510459  | 1.608318038  | 3.541580635 | 4.895592557 |
| 41 | 53 | 3.089195782 | 5.277945316 | 5.715552378 | 1.593198079  | 3.518907454 | 4.873633949 |
| 41 | 55 | 4.017303698 | 7.283239324 | 7.708969091 | 2.037391432  | 5.248134253 | 6.928952527 |
| 41 | 55 | 4.010371295 | 7.311834198 | 7.707110386 | 2.042212459  | 5.319545812 | 6.896293097 |
| 41 | 56 | 4.652448847 | 8.263501251 | 8.613330249 | 2.37091058   | 5.974672209 | 7.683233263 |
| 41 | 57 | 5.011541028 | 9.098717271 | 9.300069398 | 2.645767822  | 6.71171777  | 8.732446681 |
| 41 | 65 | 8.709714178 | 14.27247929 | 15.90629937 | 5.657858929  | 11.17117287 | 15.06272708 |
| 42 | 46 | 0.6730649   | 1.216702336 | 1.509504938 | -0.040633536 | 0.554572087 | 1.076701661 |
| 42 | 52 | 2.775199893 | 4.300564327 | 4.527492738 | 1.632605115  | 3.416566076 | 4.326991822 |
| 42 | 53 | 2.949111099 | 5.096537483 | 5.553108428 | 1.580642584  | 3.484248515 | 4.831861344 |
| 42 | 53 | 3.044318894 | 5.086378554 | 5.528484255 | 1.529834382  | 3.614472506 | 4.907941391 |
| 42 | 55 | 3.811909206 | 7.005028624 | 7.368722625 | 2.01072688   | 4.86563431  | 6.708208444 |
| 43 | 53 | 2.681692067 | 4.106009781 | 4.567076183 | 1.448929033  | 3.478357845 | 4.323311593 |
| 43 | 53 | 2.775199893 | 4.300564327 | 4.548383389 | 1.632605115  | 3.416566076 | 4.384149327 |
| 43 | 53 | 2.796264806 | 4.326146569 | 4.607376112 | 1.758550988  | 3.50390674  | 4.339546362 |
| 43 | 55 | 3.821467362 | 6.372380011 | 6.641858401 | 2.219635479  | 5.247435089 | 6.432883627 |
| 43 | 56 | 4.50102112  | 7.374683583 | 7.674014234 | 2.339805595  | 6.009632466 | 7.272380774 |
| 43 | 65 | 8.3163072   | 13.164038   | 14.97335363 | 5.393095664  | 10.1690059  | 14.18183738 |
| 43 | 65 | 8.522043291 | 13.25668398 | 14.93675625 | 5.544120135  | 10.72223669 | 13.98371449 |
| 45 | 53 | 2.189949958 | 3.635503578 | 3.814091937 | 1.605970737  | 2.920843817 | 3.764971693 |
| 45 | 53 | 2.133253252 | 3.61932508  | 3.849894631 | 1.490305529  | 2.927259697 | 3.722672121 |
| 45 | 55 | 3.363110275 | 5.722618243 | 5.977989949 | 2.094607211  | 4.735755513 | 5.685708861 |
| 45 | 65 | 7.882275826 | 12.64390102 | 14.02039643 | 5.441775175  | 10.29920048 | 13.40962784 |
| 45 | 65 | 8.101358033 | 12.67434551 | 14.17826521 | 5.296805379  | 10.26082822 | 13.3684927  |
| 47 | 53 | 2.225589759 | 3.983764648 | 4.022433606 | 1.422292864  | 3.13767955  | 3.964032163 |
| 47 | 55 | 3.305096155 | 5.970900146 | 5.97842373  | 1.93598054   | 4.962752354 | 6.025627113 |
| 47 | 56 | 3.927312135 | 6.957992439 | 7.061107375 | 2.355814674  | 5.891415277 | 7.139380002 |
| 47 | 65 | 7.914159367 | 12.5812282  | 13.84263549 | 5.509918865  | 10.48227248 | 13.83120065 |
| 47 | 65 | 7.855010097 | 12.59260857 | 13.97303244 | 5.283438382  | 10.20812198 | 13.77653683 |
| 48 | 53 | 1.708532417 | 2.822847999 | 2.952186714 | 1.098281437  | 2.436339107 | 2.983178296 |
| 49 | 53 | 1.159009263 | 1.919344566 | 1.951705867 | 0.752810221  | 1.593607107 | 1.96912031  |
| 54 | 62 | 4.4039254   | 5.992527483 | 6.853668875 | 3.658036669  | 5.111275771 | 6.847369814 |
| 54 | 62 | 4.588050114 | 6.083823274 | 6.985628004 | 3.620670261  | 5.473435218 | 6.949454898 |
| 54 | 65 | 4.378862363 | 6.176891471 | 7.547112646 | 3.523558176  | 5.277945295 | 7.322277099 |
| 54 | 65 | 4.434382156 | 6.132983491 | 7.585190543 | 3.656907898  | 5.331348819 | 7.513051025 |
| 54 | 87 | 10.68933213 | 15.34230345 | 18.75826385 | 11.40688281  | 16.09086849 | 20.37098366 |
| 54 | 87 | 10.66262448 | 15.27310356 | 18.65319913 | 11.54969888  | 16.12754303 | 20.48105259 |
| 54 | 89 | 10.31928657 | 14.89805251 | 18.60061117 | 11.03550925  | 15.63283622 | 19.8028108  |
| 54 | 89 | 10.58251502 | 15.26636649 | 18.41982149 | 11.24815608  | 16.02784473 | 20.26807648 |
| 54 | 89 | 10.50092618 | 15.01195453 | 18.4723006  | 11.20666957  | 15.8362318  | 20.31827265 |

|    |     |             |             |             |             |             |             |
|----|-----|-------------|-------------|-------------|-------------|-------------|-------------|
| 54 | 92  | 10.39892043 | 14.71160839 | 18.43056301 | 11.23226364 | 15.94942631 | 20.53885504 |
| 56 | 65  | 3.55854058  | 4.466978671 | 5.668311075 | 2.688421999 | 3.616085803 | 5.376556242 |
| 57 | 62  | 2.844487725 | 3.329925404 | 3.940474643 | 2.825501064 | 3.305637377 | 3.943799937 |
| 57 | 65  | 3.126788416 | 3.770547424 | 4.747284205 | 2.824913946 | 3.401509117 | 4.651378002 |
| 57 | 65  | 3.180818921 | 3.772683338 | 4.714045531 | 2.839654825 | 3.449479754 | 4.509555554 |
| 57 | 80  | 6.938573224 | 9.241882912 | 11.26256835 | 7.403538418 | 9.753253675 | 12.38297085 |
| 57 | 80  | 7.223370215 | 9.681605619 | 11.7538868  | 7.550199179 | 10.36554559 | 12.98790826 |
| 57 | 87  | 9.525279765 | 13.44575456 | 16.36410264 | 10.53731098 | 14.41759411 | 18.05500717 |
| 58 | 65  | 2.947557688 | 3.135772684 | 3.654906184 | 2.76509038  | 2.93220852  | 3.494012325 |
| 58 | 87  | 9.661634679 | 12.8722554  | 15.22759945 | 10.6906714  | 14.08266447 | 17.1965711  |
| 63 | 89  | 6.828534979 | 10.16442539 | 12.31912371 | 7.937056837 | 11.41980309 | 13.84904863 |
| 63 | 89  | 6.782001817 | 9.970096177 | 12.23583387 | 7.803608695 | 11.44748915 | 14.06402849 |
| 66 | 82  | 5.92568515  | 8.394713556 | 9.23576632  | 6.910995063 | 9.14553456  | 10.32864624 |
| 66 | 84  | 7.285860557 | 10.05493997 | 11.03090332 | 8.001334302 | 11.05688438 | 12.47403386 |
| 66 | 87  | 6.839443153 | 9.970832154 | 11.75626728 | 8.017573673 | 11.28857166 | 13.44028268 |
| 66 | 87  | 7.048124993 | 10.04300097 | 11.75352375 | 8.324048866 | 11.5124073  | 13.25526374 |
| 66 | 89  | 7.45016404  | 10.40249499 | 11.93041198 | 8.312143331 | 11.99888365 | 13.50326564 |
| 67 | 87  | 6.988009015 | 9.582421597 | 11.32143568 | 7.683596552 | 10.52293537 | 12.32735286 |
| 81 | 87  | 0.779385385 | 1.524421541 | 2.435626001 | 0.777037097 | 1.53938568  | 2.456005996 |
| 81 | 89  | 0.774865908 | 1.431243668 | 2.186170504 | 0.733606579 | 1.487028793 | 2.230818824 |
| 81 | 89  | 0.782747934 | 1.573113221 | 2.226910143 | 0.792016629 | 1.59091222  | 2.256396314 |
| 83 | 89  | 0.034163973 | 0.088275708 | 0.446987011 | 0.002181712 | 0.113620141 | 0.510248767 |
| 85 | 89  | 0.054243008 | 0.066757776 | 0.076341098 | 0.018121413 | 0.050115581 | 0.10412056  |
| 88 | 92  | 0.089851712 | 0.216551718 | 0.600901248 | 0.091336313 | 0.230291032 | 0.721571168 |
| 88 | 94  | 0.141242607 | 0.433127086 | 1.458032172 | 0.234257708 | 0.91425511  | 2.316717701 |
| 88 | 94  | 0.291367284 | 0.68430383  | 1.554138362 | 0.417608291 | 1.22966127  | 2.448027948 |
| 90 | 96  | 0.724512076 | 2.272142841 | 3.61131647  | 1.557544169 | 3.177964002 | 4.60746324  |
| 90 | 96  | 1.079373805 | 2.371457931 | 3.6961364   | 1.594048968 | 3.141195188 | 4.612957722 |
| 90 | 106 | 6.698807232 | 10.81604274 | 12.77564288 | 8.586297183 | 12.20596363 | 14.07300781 |
| 90 | 106 | 6.591233986 | 10.67827336 | 12.76003946 | 8.299080952 | 11.98466271 | 14.13312054 |
| 91 | 96  | 0.777290636 | 2.143153634 | 3.19341438  | 1.427590581 | 2.930166334 | 3.914733024 |
| 95 | 106 | 7.769273915 | 9.163955287 | 10.12423524 | 7.806766485 | 9.205381418 | 9.922148768 |
| 96 | 106 | 7.389955766 | 8.205081301 | 8.896397974 | 7.459875655 | 8.196172723 | 8.905999885 |
| 97 | 100 | 2.621088683 | 2.63056205  | 2.571603754 | 2.459672622 | 2.524704981 | 2.554903427 |
| 97 | 106 | 6.383450746 | 7.225477754 | 7.975450184 | 6.374565416 | 7.15184653  | 7.874848906 |

#Residues 99-106 is FLAG tag insertion on KaiB<sub>fs-nmr</sub>.

**Table S9. HDX-MS difference profile between KaiB<sub>fs-nmr</sub> free and bound to CikA<sub>PsR</sub>.**

| Residue number <sup>#</sup> | Difference in number of deuterium (bound – free) <sup>¶</sup> |         |          |
|-----------------------------|---------------------------------------------------------------|---------|----------|
|                             | 10 sec                                                        | 100 sec | 1000 sec |
| 9                           | 0.066                                                         | 0.158   | 0.128    |
| 10                          | 0.066                                                         | 0.158   | 0.128    |
| 11                          | 0.066                                                         | 0.158   | 0.128    |
| 12                          | 0.066                                                         | 0.158   | 0.128    |
| 13                          | 0.066                                                         | 0.158   | 0.128    |
| 14                          | -0.054                                                        | -0.027  | -0.006   |
| 15                          | -0.054                                                        | -0.027  | -0.006   |
| 16                          | -0.054                                                        | -0.027  | -0.006   |
| 17                          | -0.054                                                        | -0.027  | -0.006   |
| 18                          | -0.054                                                        | -0.027  | -0.006   |
| 20                          | -0.054                                                        | -0.027  | -0.006   |
| 21                          | -0.054                                                        | -0.027  | -0.006   |
| 22                          | 0.000                                                         | -0.030  | -0.060   |
| 23                          | 0.000                                                         | -0.030  | -0.060   |
| 24                          | 0.000                                                         | -0.030  | -0.060   |
| 25                          | 0.000                                                         | -0.030  | -0.060   |
| 26                          | 0.000                                                         | -0.030  | -0.060   |
| 27                          | -0.040                                                        | -0.170  | -0.286   |
| 28                          | -0.040                                                        | -0.170  | -0.286   |
| 29                          | -0.040                                                        | -0.170  | -0.286   |
| 30                          | -0.040                                                        | -0.170  | -0.286   |
| 31                          | -0.040                                                        | -0.170  | -0.286   |
| 32                          | -0.283                                                        | -0.303  | -0.183   |
| 33                          | -0.283                                                        | -0.303  | -0.183   |
| 34                          | -0.283                                                        | -0.303  | -0.183   |
| 35                          | -0.283                                                        | -0.303  | -0.183   |
| 36                          | -0.283                                                        | -0.303  | -0.183   |
| 37                          | -0.283                                                        | -0.303  | -0.183   |
| 38                          | -0.192                                                        | -0.342  | -0.234   |
| 39                          | -0.192                                                        | -0.342  | -0.234   |
| 40                          | -0.192                                                        | -0.342  | -0.234   |
| 41                          | -0.192                                                        | -0.342  | -0.234   |
| 42                          | -0.192                                                        | -0.342  | -0.234   |
| 43                          | -0.116                                                        | -0.204  | -0.138   |
| 44                          | -0.116                                                        | -0.204  | -0.138   |
| 45                          | -0.116                                                        | -0.204  | -0.138   |
| 46                          | -0.116                                                        | -0.204  | -0.138   |
| 47                          | -0.116                                                        | -0.204  | -0.138   |
| 48                          | -0.168                                                        | -0.100  | -0.005   |
| 49                          | -0.168                                                        | -0.100  | -0.005   |

|    |        |        |        |
|----|--------|--------|--------|
| 50 | -0.168 | -0.100 | -0.005 |
| 52 | -0.168 | -0.100 | -0.005 |
| 53 | -0.192 | -0.174 | -0.008 |
| 54 | -0.192 | -0.174 | -0.008 |
| 55 | -0.192 | -0.174 | -0.008 |
| 56 | -0.192 | -0.174 | -0.008 |
| 57 | -0.192 | -0.174 | -0.008 |
| 58 | -0.142 | -0.094 | -0.026 |
| 59 | -0.142 | -0.094 | -0.026 |
| 60 | -0.142 | -0.094 | -0.026 |
| 61 | -0.142 | -0.094 | -0.026 |
| 62 | -0.142 | -0.094 | -0.026 |
| 64 | 0.000  | -0.073 | -0.028 |
| 65 | 0.000  | -0.073 | -0.028 |
| 66 | 0.000  | -0.073 | -0.028 |
| 67 | 0.000  | -0.073 | -0.028 |
| 68 | 0.089  | 0.127  | 0.152  |
| 69 | 0.089  | 0.127  | 0.152  |
| 73 | 0.089  | 0.127  | 0.152  |
| 74 | 0.089  | 0.127  | 0.152  |
| 75 | 0.089  | 0.127  | 0.152  |
| 76 | 0.089  | 0.127  | 0.152  |
| 77 | 0.089  | 0.127  | 0.152  |
| 78 | 0.089  | 0.127  | 0.152  |
| 79 | 0.089  | 0.127  | 0.152  |
| 80 | 0.089  | 0.127  | 0.152  |
| 81 | 0.053  | 0.045  | 0.035  |
| 82 | 0.053  | 0.045  | 0.035  |
| 83 | 0.053  | 0.045  | 0.035  |
| 84 | 0.053  | 0.045  | 0.035  |
| 85 | 0.053  | 0.045  | 0.035  |
| 86 | 0.053  | 0.045  | 0.035  |
| 87 | 0.000  | 0.010  | 0.006  |
| 88 | 0.000  | 0.010  | 0.006  |
| 89 | 0.000  | 0.010  | 0.006  |
| 90 | 0.000  | 0.010  | 0.006  |
| 91 | 0.000  | 0.010  | 0.006  |
| 92 | 0.188  | 0.184  | 0.210  |
| 93 | 0.188  | 0.184  | 0.210  |
| 94 | 0.188  | 0.184  | 0.210  |
| 95 | 0.188  | 0.184  | 0.210  |
| 96 | 0.188  | 0.184  | 0.210  |
| 97 | 0.046  | 0.030  | 0.013  |



|     |       |       |       |
|-----|-------|-------|-------|
| 98  | 0.046 | 0.030 | 0.013 |
| 99  | 0.046 | 0.030 | 0.013 |
| 100 | 0.046 | 0.030 | 0.013 |
| 101 | 0.046 | 0.030 | 0.013 |
| 102 | 0.046 | 0.030 | 0.013 |
| 103 | 0.046 | 0.030 | 0.013 |
| 104 | 0.046 | 0.030 | 0.013 |
| 105 | 0.046 | 0.030 | 0.013 |
| 106 | 0.046 | 0.030 | 0.013 |

---

#Residues 99-106 is FLAG tag insertion on KaiB<sub>fs-nmr</sub>.

¶Sub-localized exchange level was analyzed as described previously (68).

**Table S10. HDX-MS deuterium uptake profile of CikA<sub>PsR</sub> free and bound to KaiB<sub>fs-nmr</sub>.**

| Peptide residues |     | Deuterium uptake         |             |             |                                                     |             |             |
|------------------|-----|--------------------------|-------------|-------------|-----------------------------------------------------|-------------|-------------|
|                  |     | Free CikA <sub>PsR</sub> |             |             | CikA <sub>PsR</sub> bound to KaiB <sub>fs-nmr</sub> |             |             |
| Start            | End | 10 sec                   | 100 sec     | 1000 sec    | 10 sec                                              | 100 sec     | 1000 sec    |
| 613              | 618 | 0.264219456              | 0.563218745 | 1.350385604 | 0.209768297                                         | 0.320782476 | 0.734109818 |
| 613              | 622 | 0.715149758              | 2.880299664 | 4.477796906 | 0.399514108                                         | 2.337970165 | 3.617821864 |
| 613              | 628 | 4.978974448              | 8.945037292 | 11.20576012 | 4.520142797                                         | 8.429767097 | 10.26781958 |
| 619              | 627 | 3.051098216              | 5.573155713 | 6.643972942 | 3.067056408                                         | 5.489052443 | 6.629201991 |
| 619              | 627 | 3.036511268              | 5.665307939 | 6.620525189 | 3.069160323                                         | 5.622080246 | 6.601268122 |
| 619              | 628 | 3.642354916              | 6.406070608 | 7.667589042 | 3.614303792                                         | 6.377956789 | 7.658445295 |
| 619              | 628 | 3.645776212              | 6.568742932 | 7.664001839 | 3.577912244                                         | 6.542993231 | 7.59494848  |
| 622              | 628 | 2.14540874               | 3.879259836 | 4.619765878 | 2.111798239                                         | 3.860147079 | 4.601504582 |
| 623              | 628 | 1.18896958               | 3.047505448 | 3.618981882 | 1.174300582                                         | 3.028259699 | 3.592937919 |
| 629              | 633 | 0.441694715              | 2.376758381 | 2.928331376 | 0.108691381                                         | 1.385526117 | 2.46479932  |
| 632              | 637 | 1.597803224              | 2.555469594 | 3.460298832 | 0.72125505                                          | 1.954050626 | 2.821227129 |
| 632              | 638 | 1.685329035              | 2.588535059 | 3.532316922 | 0.689027239                                         | 2.106701548 | 2.964791325 |
| 632              | 639 | 1.643016781              | 2.90610793  | 4.615330384 | 0.729611379                                         | 2.043358798 | 3.305649038 |
| 632              | 639 | 1.630423458              | 2.900704768 | 4.290581823 | 0.726551588                                         | 2.028064047 | 3.358677331 |
| 632              | 643 | 1.897430329              | 4.300326624 | 7.761769879 | 0.914522692                                         | 2.4581909   | 4.92551996  |
| 632              | 651 | 3.86051372               | 9.83005424  | 15.06839895 | 3.272867765                                         | 7.155784244 | 11.23528013 |
| 632              | 651 | 4.24351229               | 10.00833487 | 15.2555697  | 3.233457347                                         | 6.733305076 | 10.95878442 |
| 633              | 639 | 1.364274923              | 2.558310711 | 3.986956367 | 0.535340859                                         | 1.760491583 | 2.953068101 |
| 634              | 638 | 0.247698253              | 1.030126285 | 1.819963307 | 0.139885531                                         | 0.547533654 | 1.300272237 |
| 634              | 639 | 0.315292382              | 1.445401691 | 2.854285147 | 0.15845902                                          | 0.660685284 | 1.798368267 |
| 634              | 643 | 0.536962452              | 2.762402239 | 6.120052004 | 0.018203741                                         | 0.743938707 | 3.425102081 |
| 634              | 643 | 0.599795855              | 2.909518558 | 6.139905186 | 0.124728222                                         | 1.036780304 | 3.374968913 |
| 634              | 651 | 3.049036082              | 8.495159476 | 13.36357068 | 2.653868754                                         | 6.081774894 | 9.839782426 |
| 634              | 651 | 3.230913904              | 8.56393698  | 13.49790193 | 2.6634851                                           | 5.489088551 | 9.336119292 |
| 638              | 642 | 0.200610888              | 1.211300555 | 2.825332122 | 0                                                   | 0.229097478 | 1.333396573 |
| 638              | 643 | 0.25450018               | 1.460157433 | 3.288818664 | 0.04745516                                          | 0.29742519  | 1.556681246 |
| 638              | 646 | 0.598548606              | 2.810279078 | 6.150063408 | 0.45070703                                          | 1.419809179 | 3.3526458   |
| 638              | 651 | 2.685336575              | 6.923570347 | 10.28601454 | 2.447555466                                         | 5.0598628   | 7.405495438 |
| 639              | 643 | 0.230682245              | 1.582851955 | 2.583748864 | 0                                                   | 0.294130598 | 1.762203874 |
| 639              | 651 | 2.446495945              | 6.885170977 | 9.589415387 | 2.202308566                                         | 5.152884832 | 7.396088854 |
| 644              | 651 | 1.780419961              | 4.324879553 | 4.987831586 | 1.820322844                                         | 4.317885082 | 4.92065088  |
| 647              | 651 | 0.50333164               | 1.679022145 | 2.169364788 | 0.466822149                                         | 1.652330363 | 2.15702142  |
| 652              | 658 | 0.556678828              | 1.71015534  | 2.508111757 | 0.23291584                                          | 0.918124943 | 1.80707373  |
| 652              | 659 | 0.631934348              | 2.038677709 | 3.178885193 | 0.22932882                                          | 1.02376632  | 2.204497756 |
| 652              | 660 | 0.721869501              | 2.240441106 | 3.515180874 | 0.17771495                                          | 1.128983422 | 2.38704472  |
| 652              | 660 | 0.678860033              | 2.093225814 | 3.391039614 | 0.252769176                                         | 1.038277559 | 2.187384463 |
| 659              | 673 | 4.577544107              | 7.302481438 | 8.088358078 | 3.812096821                                         | 6.768978076 | 7.8641884   |

|     |     |             |             |             |             |             |             |
|-----|-----|-------------|-------------|-------------|-------------|-------------|-------------|
| 661 | 666 | 1.42656876  | 2.257053087 | 2.463056334 | 1.410970046 | 2.261904172 | 2.458519182 |
| 661 | 672 | 4.157334897 | 6.548310564 | 7.254041144 | 3.432741479 | 6.107158307 | 6.876615698 |
| 661 | 672 | 4.049767252 | 6.491230663 | 7.156293485 | 3.436944695 | 6.152627627 | 6.864498644 |
| 661 | 673 | 4.145742475 | 6.613460626 | 7.34828134  | 3.495258237 | 6.234775436 | 7.073951174 |
| 661 | 677 | 4.427986936 | 7.143473176 | 8.02951336  | 3.217689395 | 6.264920677 | 7.421479508 |
| 661 | 686 | 5.861049445 | 11.2367402  | 14.53532872 | 5.07484894  | 10.57528563 | 13.83702999 |
| 661 | 688 | 5.82333462  | 11.59051019 | 14.88330575 | 5.280797614 | 10.90970869 | 14.05014731 |
| 664 | 672 | 2.948453235 | 5.198370407 | 5.717655699 | 2.39509768  | 4.774159263 | 5.694960431 |
| 669 | 673 | 0.114144083 | 0.210610248 | 0.849381579 | 0.083299691 | 0.192316981 | 0.810364313 |
| 673 | 677 | 0.017902135 | 0.01829996  | 0.078042532 | 0.004972815 | 0.019692348 | 0.045225047 |
| 673 | 685 | 2.381729889 | 5.16137513  | 7.504779389 | 2.820275669 | 5.712042474 | 7.656324198 |
| 673 | 688 | 2.509063631 | 5.677479619 | 8.320573943 | 2.890920504 | 6.182041579 | 8.394137658 |
| 674 | 686 | 2.383711581 | 5.12641076  | 7.561111604 | 2.823977919 | 5.61368486  | 7.595370566 |
| 674 | 688 | 2.406872283 | 5.421776206 | 7.998947005 | 2.81928412  | 5.979755008 | 8.053392952 |
| 678 | 688 | 2.042601472 | 4.364292072 | 6.516283129 | 2.272394146 | 4.650891313 | 6.675287007 |
| 686 | 701 | 6.52745671  | 10.19306706 | 11.49273032 | 6.060487918 | 9.589921238 | 11.0975231  |
| 686 | 712 | 7.372153092 | 12.79394011 | 15.43291755 | 6.434235292 | 11.67885392 | 14.47917736 |
| 686 | 713 | 7.358455025 | 13.36976695 | 16.95633312 | 6.68169303  | 12.26496897 | 15.81642224 |
| 686 | 714 | 7.413139986 | 13.4280289  | 17.41279052 | 6.428335605 | 12.48157466 | 16.09326942 |
| 687 | 701 | 6.266231886 | 10.02698833 | 10.98083476 | 5.931709181 | 9.549547986 | 10.62287718 |
| 687 | 712 | 7.495542544 | 12.49352103 | 15.00241292 | 6.837389963 | 11.33991197 | 13.76476424 |
| 687 | 713 | 7.433711091 | 12.83486722 | 16.03875745 | 6.611280253 | 11.67261284 | 14.65703741 |
| 687 | 713 | 7.312240894 | 12.80574282 | 16.02686516 | 6.871336416 | 11.64022993 | 14.702655   |
| 687 | 714 | 7.488511932 | 13.25318158 | 16.99363885 | 7.169275225 | 12.39623604 | 16.33647921 |
| 687 | 714 | 7.359894372 | 13.37065313 | 17.04658046 | 6.683194698 | 12.26595686 | 15.99963135 |
| 688 | 713 | 7.075425736 | 12.82007219 | 16.53181622 | 6.386985171 | 11.80937743 | 15.17208852 |
| 689 | 701 | 5.788951892 | 9.132874323 | 9.86978492  | 5.486958173 | 8.750184496 | 9.510881862 |
| 689 | 712 | 7.100879437 | 11.72841365 | 13.97405533 | 6.666620906 | 11.02262538 | 12.9805072  |
| 689 | 712 | 7.219900045 | 11.93888577 | 14.21650608 | 6.699922706 | 11.22159077 | 13.20126259 |
| 689 | 713 | 7.166301387 | 12.23731501 | 15.24287801 | 6.497023265 | 11.14216495 | 13.89013193 |
| 689 | 713 | 7.098836369 | 12.19120626 | 15.16164465 | 6.420684002 | 11.17873295 | 13.91802351 |
| 689 | 714 | 7.173503498 | 12.82339698 | 16.40749771 | 6.549207178 | 11.7670434  | 14.97123437 |
| 689 | 714 | 7.073773386 | 12.82115029 | 16.53700711 | 6.463478942 | 11.79167431 | 15.27526578 |
| 690 | 713 | 7.219900045 | 11.93888577 | 14.21650608 | 6.798416041 | 11.11883758 | 13.35574663 |
| 702 | 712 | 2.853227548 | 3.983085305 | 4.142098815 | 2.838812507 | 3.936734816 | 4.074756885 |
| 702 | 712 | 2.88116394  | 4.112976154 | 4.28153232  | 2.779912094 | 4.105582171 | 4.187363294 |
| 702 | 713 | 2.70814609  | 4.28145612  | 5.127882339 | 2.647973688 | 4.215618463 | 5.033089475 |
| 702 | 713 | 2.803472206 | 4.315040072 | 5.294526945 | 2.768534567 | 4.248775926 | 5.245515535 |
| 702 | 714 | 2.843364936 | 4.927421997 | 6.483081298 | 2.808582897 | 4.845372486 | 6.470377136 |
| 702 | 714 | 2.680779034 | 4.803594749 | 6.323428136 | 2.5996412   | 4.730053273 | 6.296307261 |
| 702 | 716 | 3.278250625 | 5.982794564 | 7.916290656 | 3.197858315 | 5.912237875 | 7.908690112 |
| 704 | 713 | 2.785881466 | 4.602775951 | 5.11362702  | 2.725780004 | 4.558550406 | 5.094846594 |
| 713 | 721 | 1.778742367 | 3.552220315 | 4.996554114 | 1.776935494 | 3.54636927  | 4.965277248 |

|     |     |             |             |             |             |             |             |
|-----|-----|-------------|-------------|-------------|-------------|-------------|-------------|
| 713 | 721 | 1.679951429 | 3.43661472  | 4.965687967 | 1.699270884 | 3.452319337 | 4.91980891  |
| 713 | 724 | 5.032047597 | 6.845189733 | 8.264101351 | 4.95334738  | 6.756849076 | 8.204210437 |
| 714 | 718 | 0.029717857 | 0.063042354 | 0.479308001 | 0.019166302 | 0.067016139 | 0.454413337 |
| 714 | 721 | 1.289250964 | 2.678705266 | 4.083061681 | 1.257849738 | 2.645373417 | 4.077917385 |
| 714 | 721 | 1.285993638 | 2.678650282 | 4.019855746 | 1.227282866 | 2.616738874 | 3.968883402 |
| 714 | 724 | 4.803702935 | 6.254057578 | 7.410329008 | 4.775066537 | 6.21055317  | 7.382204191 |
| 714 | 724 | 4.680043244 | 6.150427263 | 7.407972224 | 4.661033554 | 6.100308486 | 7.374249632 |
| 714 | 729 | 9.760836639 | 11.34950138 | 12.4819737  | 9.707187619 | 11.29760296 | 12.42672862 |
| 715 | 721 | 1.238844382 | 2.526867658 | 3.803804904 | 1.217728002 | 2.524278148 | 3.784337889 |
| 715 | 724 | 4.469208636 | 5.907340904 | 6.941955802 | 4.4865544   | 5.914341075 | 6.902006387 |
| 715 | 724 | 4.515080008 | 5.935056944 | 7.046206032 | 4.426771999 | 5.865230951 | 7.004288034 |
| 720 | 724 | 2.69935152  | 3.061781182 | 3.079462407 | 2.668099312 | 2.967421368 | 3.092850809 |
| 721 | 729 | 6.728224992 | 7.044733626 | 7.112826966 | 6.718685418 | 7.141505822 | 7.123548928 |
| 722 | 729 | 5.784321938 | 6.132914677 | 6.149517638 | 5.779280212 | 6.008336955 | 6.146640295 |
| 722 | 729 | 5.797680054 | 5.977911944 | 6.035576214 | 5.769529239 | 5.940453232 | 6.016020144 |

**Table S11. HDX-MS difference profile between CikA<sub>PSR</sub> free and bound to KaiB<sub>fs-nmr</sub>.**

| Residue number | Difference in number of deuteron (bound – free) <sup>¶</sup> |         |          |
|----------------|--------------------------------------------------------------|---------|----------|
|                | 10 sec                                                       | 100 sec | 1000 sec |
| 615            | -0.060                                                       | -0.083  | -0.148   |
| 616            | -0.060                                                       | -0.083  | -0.148   |
| 617            | -0.060                                                       | -0.083  | -0.148   |
| 618            | -0.060                                                       | -0.083  | -0.148   |
| 619            | -0.060                                                       | -0.083  | -0.148   |
| 620            | -0.060                                                       | -0.083  | -0.148   |
| 621            | -0.006                                                       | -0.004  | -0.003   |
| 622            | -0.006                                                       | -0.004  | -0.003   |
| 623            | -0.006                                                       | -0.004  | -0.003   |
| 624            | -0.006                                                       | -0.004  | -0.003   |
| 625            | -0.006                                                       | -0.004  | -0.003   |
| 626            | -0.006                                                       | -0.004  | -0.003   |
| 627            | -0.006                                                       | -0.004  | -0.003   |
| 628            | -0.006                                                       | -0.004  | -0.003   |
| 631            | -0.178                                                       | -0.216  | -0.118   |
| 632            | -0.178                                                       | -0.216  | -0.118   |
| 633            | -0.178                                                       | -0.216  | -0.118   |
| 634            | -0.178                                                       | -0.216  | -0.118   |
| 635            | -0.178                                                       | -0.216  | -0.118   |
| 636            | -0.056                                                       | -0.170  | -0.352   |
| 637            | -0.056                                                       | -0.170  | -0.352   |
| 638            | -0.056                                                       | -0.170  | -0.352   |
| 639            | -0.056                                                       | -0.170  | -0.352   |
| 640            | -0.056                                                       | -0.170  | -0.352   |
| 641            | -0.026                                                       | -0.362  | -0.374   |
| 642            | -0.026                                                       | -0.362  | -0.374   |
| 643            | -0.026                                                       | -0.362  | -0.374   |
| 644            | -0.026                                                       | -0.362  | -0.374   |
| 645            | -0.026                                                       | -0.362  | -0.374   |
| 646            | 0.002                                                        | -0.008  | -0.038   |
| 647            | 0.002                                                        | -0.008  | -0.038   |
| 648            | 0.002                                                        | -0.008  | -0.038   |
| 649            | 0.002                                                        | -0.008  | -0.038   |
| 650            | 0.002                                                        | -0.008  | -0.038   |
| 651            | 0.002                                                        | -0.008  | -0.038   |
| 654            | -0.083                                                       | -0.198  | -0.175   |
| 655            | -0.083                                                       | -0.198  | -0.175   |
| 657            | -0.083                                                       | -0.198  | -0.175   |

|     |        |        |        |
|-----|--------|--------|--------|
| 658 | -0.083 | -0.198 | -0.175 |
| 659 | -0.060 | -0.050 | -0.070 |
| 660 | -0.060 | -0.050 | -0.070 |
| 661 | -0.060 | -0.050 | -0.070 |
| 662 | -0.060 | -0.050 | -0.070 |
| 663 | -0.060 | -0.050 | -0.070 |
| 665 | -0.060 | -0.050 | -0.070 |
| 666 | -0.106 | -0.100 | -0.060 |
| 667 | -0.106 | -0.100 | -0.060 |
| 668 | -0.106 | -0.100 | -0.060 |
| 669 | -0.106 | -0.100 | -0.060 |
| 670 | -0.106 | -0.100 | -0.060 |
| 671 | -0.006 | -0.004 | 0.000  |
| 672 | -0.006 | -0.004 | 0.000  |
| 673 | -0.006 | -0.004 | 0.000  |
| 674 | -0.006 | -0.004 | 0.000  |
| 675 | -0.006 | -0.004 | 0.000  |
| 676 | 0.038  | 0.033  | 0.000  |
| 677 | 0.038  | 0.033  | 0.000  |
| 678 | 0.038  | 0.033  | 0.000  |
| 679 | 0.038  | 0.033  | 0.000  |
| 680 | 0.038  | 0.033  | 0.000  |
| 681 | 0.038  | 0.033  | 0.000  |
| 682 | 0.038  | 0.033  | 0.000  |
| 684 | 0.038  | 0.033  | 0.000  |
| 685 | 0.038  | 0.033  | 0.000  |
| 686 | -0.012 | -0.010 | 0.004  |
| 687 | -0.012 | -0.010 | 0.004  |
| 688 | -0.012 | -0.010 | 0.004  |
| 689 | -0.012 | -0.010 | 0.004  |
| 690 | -0.012 | -0.010 | 0.004  |
| 691 | -0.041 | -0.065 | -0.079 |
| 692 | -0.041 | -0.065 | -0.079 |
| 693 | -0.041 | -0.065 | -0.079 |
| 694 | -0.041 | -0.065 | -0.079 |
| 695 | -0.041 | -0.065 | -0.079 |
| 696 | -0.041 | -0.065 | -0.079 |
| 697 | -0.041 | -0.065 | -0.079 |
| 698 | -0.041 | -0.065 | -0.079 |
| 699 | -0.041 | -0.065 | -0.079 |
| 700 | -0.041 | -0.065 | -0.079 |
| 701 | -0.041 | -0.065 | -0.079 |
| 702 | -0.015 | -0.014 | -0.031 |

|     |        |        |        |
|-----|--------|--------|--------|
| 703 | -0.015 | -0.014 | -0.031 |
| 704 | -0.015 | -0.014 | -0.031 |
| 706 | -0.015 | -0.014 | -0.031 |
| 708 | -0.015 | -0.014 | -0.031 |
| 709 | -0.015 | -0.014 | -0.031 |
| 711 | -0.015 | -0.014 | -0.031 |
| 712 | -0.015 | -0.014 | -0.031 |
| 713 | 0.003  | -0.003 | -0.003 |
| 714 | 0.003  | -0.003 | -0.003 |
| 715 | 0.003  | -0.003 | -0.003 |
| 716 | 0.003  | -0.003 | -0.003 |
| 717 | 0.003  | -0.003 | -0.003 |
| 718 | 0.003  | -0.003 | -0.003 |
| 719 | -0.006 | -0.008 | 0.000  |
| 720 | -0.006 | -0.008 | 0.000  |
| 721 | -0.006 | -0.008 | 0.000  |
| 722 | -0.006 | -0.008 | 0.000  |
| 723 | -0.006 | -0.008 | 0.000  |
| 724 | -0.002 | 0.000  | 0.000  |
| 725 | -0.002 | 0.000  | 0.000  |
| 726 | -0.002 | 0.000  | 0.000  |
| 727 | -0.002 | 0.000  | 0.000  |
| 728 | -0.002 | 0.000  | 0.000  |
| 729 | -0.002 | 0.000  | 0.000  |

---

<sup>¶</sup>Sub-localized exchange level was analyzed as described previously (68).

**Table S12. Plasmids for making cyanobacterial strains used in this study.**

| Plasmid | Description                                                                                                                                                                                                                                           | Antibiotic resistance          | Source            |
|---------|-------------------------------------------------------------------------------------------------------------------------------------------------------------------------------------------------------------------------------------------------------|--------------------------------|-------------------|
| pAM4731 | $P_{kaiB}$ - $kaiB^{Se}$ in neutral site 1. Transformed into strain AMC2133 and replaces gentamycin marked $kaiB^{Se}$ with nourseothricin marked $kaiB^{Se}$ in neutral site 1.                                                                      | Nourseothricin                 | Chang et al. (39) |
| pAM4985 | Neutral site 1 vector with nourseothricin resistance cassette. Transformed into strain AMC2133 and replaces gentamycin marked $kaiB^{Se}$ with nourseothricin marker to create a $\Delta kaiB^{Se}$ strain.                                           | Nourseothricin                 | Chang et al. (39) |
| pAM5290 | $P_{kaiB}$ - $A40D$ - $kaiB^{Se}$ in neutral site 1. Transformed into strain AMC2133 and replaces gentamycin marked $kaiB^{Se}$ with $A40D$ - $kaiB^{Se}$ marked with nourseothricin in neutral site 1.                                               | Nourseothricin                 | This work         |
| pAM5291 | $P_{kaiB}$ - $K42E$ - $kaiB^{Se}$ in neutral site 1. Transformed into strain AMC2133 and replaces gentamycin marked $kaiB^{Se}$ with $K42E$ - $kaiB^{Se}$ marked with nourseothricin in neutral site 1.                                               | Nourseothricin                 | This work         |
| pAM5292 | $P_{kaiA}$ - $kaiA^{Se}$ expressed from neutral site 2. Transformed into strain AMC1898 for $kaiA^{Se}$ complementation studies.                                                                                                                      | Nourseothricin                 | This work         |
| pAM5293 | $P_{kaiA}$ - $L155A$ - $kaiA^{Se}$ expressed from neutral site 2. Transformed into strain AMC1898 for $kaiA^{Se}$ complementation studies.                                                                                                            | Nourseothricin                 | This work         |
| pAM3389 | $P_{trc}$ - $cikA^{Se}$ expressed from neutral site 1. Transformed into strain AMC1475 for $cikA^{Se}$ complementation studies. $cikA^{Se}$ is thioredoxin tagged $cikA^{Se}$ published in Zhang et al. (60).                                         | Spectinomycin and Streptomycin | Zhang et al. (60) |
| pAM5294 | $P_{trc}$ - $C644R$ - $cikA^{Se}$ expressed from neutral site 1. Transformed into strain AMC1475 for $cikA^{Se}$ complementation studies. $C644R$ - $cikA^{Se}$ has a thioredoxin tag similar to thioredoxin tagged $cikA^{Se}$ in Zhang et al. (60). | Spectinomycin and Streptomycin | This work         |



**Table S13. Cyanobacterial strains used in this study.**

| Strain  | Genotype (NS denotes neutral site)                                                                                                                                    | Antibiotic resistance                     | Source             |
|---------|-----------------------------------------------------------------------------------------------------------------------------------------------------------------------|-------------------------------------------|--------------------|
| AMC1825 | <i>S. elongatus</i> with NS1-P <sub>kaiB</sub> - <i>luc</i>                                                                                                           | Spectinomycin and Streptomycin            | Chang et al. (39)  |
| AMC1898 | Insertional mutation of <i>kaiA</i> <sup>Se</sup> in AMC1825 (NS1-P <sub>kaiB</sub> - <i>luc</i> )                                                                    | Kanamycin, Spectinomycin and Streptomycin | This work          |
| AMC2133 | $\Delta$ <i>kaiBC</i> strain transformed with NS1-Gm- <i>KaiB</i> <sup>Se</sup> , NS2-Km- <i>KaiC</i> <sup>Se</sup> , and NS3-P <sub>kaiB</sub> - <i>luc</i> reporter | Gentamycin, Kanamycin and Chloramphenicol | Chang et al. (39)  |
| AMC669  | <i>S. elongatus</i> transformed with pAM2195 (NS2-P <sub>psbA1</sub> - <i>luxAB</i> , P <sub>psbA1</sub> - <i>luxCDE</i> )                                            | Chloramphenicol                           | Mackey et al. (66) |
| AMC1475 | AMC669 (NS2-P <sub>psbA1</sub> - <i>luxAB</i> , <i>luxCDE</i> ), transformed with pAM2152 to delete <i>cikA</i> <sup>Se</sup>                                         | Chloramphenicol and Gentamycin            | Mackey et al. (82) |

## References

1. K. Whitehead, M. Pan, K. Masumura, R. Bonneau, N. S. Baliga, Diurnally entrained anticipatory behavior in archaea. *PLOS ONE* **4**, e5485 (2009).  
[doi:10.1371/journal.pone.0005485](https://doi.org/10.1371/journal.pone.0005485) [Medline](#)
2. R. S. Edgar, E. W. Green, Y. Zhao, G. van Ooijen, M. Olmedo, X. Qin, Y. Xu, M. Pan, U. K. Valekunja, K. A. Feeney, E. S. Maywood, M. H. Hastings, N. S. Baliga, M. Meroow, A. J. Millar, C. H. Johnson, C. P. Kyriacou, J. S. O'Neill, A. B. Reddy, Peroxiredoxins are conserved markers of circadian rhythms. *Nature* **485**, 459–464 (2012). [Medline](#)
3. T. Kondo, C. A. Strayer, R. D. Kulkarni, W. Taylor, M. Ishiura, S. S. Golden, C. H. Johnson, Circadian rhythms in prokaryotes: Luciferase as a reporter of circadian gene expression in cyanobacteria. *Proc. Natl. Acad. Sci. U.S.A.* **90**, 5672–5676 (1993).  
[doi:10.1073/pnas.90.12.5672](https://doi.org/10.1073/pnas.90.12.5672) [Medline](#)
4. C. S. Pittendrigh, On temperature independence in the clock system controlling emergence time in *Drosophila*. *Proc. Natl. Acad. Sci. U.S.A.* **40**, 1018–1029 (1954).  
[doi:10.1073/pnas.40.10.1018](https://doi.org/10.1073/pnas.40.10.1018) [Medline](#)
5. R. J. Konopka, S. Benzer, Clock mutants of *Drosophila melanogaster*. *Proc. Natl. Acad. Sci. U.S.A.* **68**, 2112–2116 (1971). [doi:10.1073/pnas.68.9.2112](https://doi.org/10.1073/pnas.68.9.2112) [Medline](#)
6. D. Bell-Pedersen, V. M. Cassone, D. J. Earnest, S. S. Golden, P. E. Hardin, T. L. Thomas, M. J. Zoran, Circadian rhythms from multiple oscillators: Lessons from diverse organisms. *Nat. Rev. Genet.* **6**, 544–556 (2005). [doi:10.1038/nrg1633](https://doi.org/10.1038/nrg1633) [Medline](#)
7. J. C. Dunlap, J. J. Loros, P. J. DeCoursey, *Chronobiology: Biological Timekeeping* (Sinauer Associates, Inc., Sunderland, MA, 2004).
8. R. Papazyan, Y. Zhang, M. A. Lazar, Genetic and epigenomic mechanisms of mammalian circadian transcription. *Nat. Struct. Mol. Biol.* **23**, 1045–1052 (2016).  
[doi:10.1038/nsmb.3324](https://doi.org/10.1038/nsmb.3324) [Medline](#)
9. S. Panda, Circadian physiology of metabolism. *Science* **354**, 1008–1015 (2016).  
[doi:10.1126/science.aah4967](https://doi.org/10.1126/science.aah4967) [Medline](#)
10. E. S. Musiek, D. M. Holtzman, Mechanisms linking circadian clocks, sleep, and neurodegeneration. *Science* **354**, 1004–1008 (2016). [doi:10.1126/science.aah4968](https://doi.org/10.1126/science.aah4968)  
[Medline](#)
11. J. Bass, M. A. Lazar, Circadian time signatures of fitness and disease. *Science* **354**, 994–999 (2016). [doi:10.1126/science.aah4965](https://doi.org/10.1126/science.aah4965) [Medline](#)
12. V. Vijayan, R. Zuzow, E. K. O'Shea, Oscillations in supercoiling drive circadian gene expression in cyanobacteria. *Proc. Natl. Acad. Sci. U.S.A.* **106**, 22564–22568 (2009).  
[doi:10.1073/pnas.0912673106](https://doi.org/10.1073/pnas.0912673106) [Medline](#)
13. M. A. Woelfle, Y. Ouyang, K. Phanvijhitsiri, C. H. Johnson, The adaptive value of circadian clocks: An experimental assessment in cyanobacteria. *Curr. Biol.* **14**, 1481–1486 (2004).  
[doi:10.1016/j.cub.2004.08.023](https://doi.org/10.1016/j.cub.2004.08.023) [Medline](#)

14. G. Lambert, J. Chew, M. J. Rust, Costs of clock-environment misalignment in individual cyanobacterial cells. *Biophys. J.* **111**, 883–891 (2016). [doi:10.1016/j.bpj.2016.07.008](https://doi.org/10.1016/j.bpj.2016.07.008) [Medline](#)
15. S. Diamond, D. Jun, B. E. Rubin, S. S. Golden, The circadian oscillator in *Synechococcus elongatus* controls metabolite partitioning during diurnal growth. *Proc. Natl. Acad. Sci. U.S.A.* **112**, E1916–E1925 (2015). [doi:10.1073/pnas.1504576112](https://doi.org/10.1073/pnas.1504576112) [Medline](#)
16. M. Ishiura, S. Kutsuna, S. Aoki, H. Iwasaki, C. R. Andersson, A. Tanabe, S. S. Golden, C. H. Johnson, T. Kondo, Expression of a gene cluster *kaiABC* as a circadian feedback process in cyanobacteria. *Science* **281**, 1519–1523 (1998). [doi:10.1126/science.281.5382.1519](https://doi.org/10.1126/science.281.5382.1519) [Medline](#)
17. M. Nakajima, K. Imai, H. Ito, T. Nishiwaki, Y. Murayama, H. Iwasaki, T. Oyama, T. Kondo, Reconstitution of circadian oscillation of cyanobacterial KaiC phosphorylation in vitro. *Science* **308**, 414–415 (2005). [doi:10.1126/science.1108451](https://doi.org/10.1126/science.1108451) [Medline](#)
18. H. Iwasaki, S. B. Williams, Y. Kitayama, M. Ishiura, S. S. Golden, T. Kondo, A kaiC-interacting sensory histidine kinase, SasA, necessary to sustain robust circadian oscillation in cyanobacteria. *Cell* **101**, 223–233 (2000). [doi:10.1016/S0092-8674\(00\)80832-6](https://doi.org/10.1016/S0092-8674(00)80832-6) [Medline](#)
19. O. Schmitz, M. Katayama, S. B. Williams, T. Kondo, S. S. Golden, CikA, a bacteriophytochrome that resets the cyanobacterial circadian clock. *Science* **289**, 765–768 (2000). [doi:10.1126/science.289.5480.765](https://doi.org/10.1126/science.289.5480.765) [Medline](#)
20. S. E. Cohen, S. S. Golden, Circadian rhythms in cyanobacteria. *Microbiol. Mol. Biol. Rev.* **79**, 373–385 (2015). [doi:10.1128/MMBR.00036-15](https://doi.org/10.1128/MMBR.00036-15) [Medline](#)
21. A. Gutu, E. K. O’Shea, Two antagonistic clock-regulated histidine kinases time the activation of circadian gene expression. *Mol. Cell* **50**, 288–294 (2013). [doi:10.1016/j.molcel.2013.02.022](https://doi.org/10.1016/j.molcel.2013.02.022) [Medline](#)
22. J. Abe, T. B. Hiyama, A. Mukaiyama, S. Son, T. Mori, S. Saito, M. Osako, J. Wolanin, E. Yamashita, T. Kondo, S. Akiyama, Atomic-scale origins of slowness in the cyanobacterial circadian clock. *Science* **349**, 312–316 (2015). [doi:10.1126/science.1261040](https://doi.org/10.1126/science.1261040) [Medline](#)
23. J. Wang, Nucleotide-dependent domain motions within rings of the RecA/AAA+ superfamily. *J. Struct. Biol.* **148**, 259–267 (2004). [doi:10.1016/j.jsb.2004.07.003](https://doi.org/10.1016/j.jsb.2004.07.003) [Medline](#)
24. T. Nishiwaki, H. Iwasaki, M. Ishiura, T. Kondo, Nucleotide binding and autophosphorylation of the clock protein KaiC as a circadian timing process of cyanobacteria. *Proc. Natl. Acad. Sci. U.S.A.* **97**, 495–499 (2000). [doi:10.1073/pnas.97.1.495](https://doi.org/10.1073/pnas.97.1.495) [Medline](#)
25. M. Egli, T. Mori, R. Pattanayek, Y. Xu, X. Qin, C. H. Johnson, Dephosphorylation of the core clock protein KaiC in the cyanobacterial KaiABC circadian oscillator proceeds via an ATP synthase mechanism. *Biochemistry* **51**, 1547–1558 (2012). [doi:10.1021/bi201525n](https://doi.org/10.1021/bi201525n) [Medline](#)
26. T. Nishiwaki, T. Kondo, Circadian autodephosphorylation of cyanobacterial clock protein KaiC occurs via formation of ATP as intermediate. *J. Biol. Chem.* **287**, 18030–18035 (2012). [doi:10.1074/jbc.M112.350660](https://doi.org/10.1074/jbc.M112.350660) [Medline](#)

27. Y. G. Chang, N. W. Kuo, R. Tseng, A. LiWang, Flexibility of the C-terminal, or CII, ring of KaiC governs the rhythm of the circadian clock of cyanobacteria. *Proc. Natl. Acad. Sci. U.S.A.* **108**, 14431–14436 (2011). doi:10.1073/pnas.1104221108 [Medline](#)
28. R. Tseng, Y.-G. Chang, I. Bravo, R. Latham, A. Chaudhary, N.-W. Kuo, A. LiWang, Cooperative KaiA-KaiB-KaiC interactions affect KaiB/SasA competition in the circadian clock of cyanobacteria. *J. Mol. Biol.* **426**, 389–402 (2014). doi:10.1016/j.jmb.2013.09.040 [Medline](#)
29. Y. G. Chang, R. Tseng, N. W. Kuo, A. LiWang, Rhythmic ring-ring stacking drives the circadian oscillator clockwise. *Proc. Natl. Acad. Sci. U.S.A.* **109**, 16847–16851 (2012). doi:10.1073/pnas.1211508109 [Medline](#)
30. J. Lin, J. Chew, U. Chockanathan, M. J. Rust, Mixtures of opposing phosphorylations within hexamers precisely time feedback in the cyanobacterial circadian clock. *Proc. Natl. Acad. Sci. U.S.A.* **111**, E3937–E3945 (2014). doi:10.1073/pnas.1408692111 [Medline](#)
31. T. Nishiwaki, Y. Satomi, Y. Kitayama, K. Terauchi, R. Kiyohara, T. Takao, T. Kondo, A sequential program of dual phosphorylation of KaiC as a basis for circadian rhythm in cyanobacteria. *EMBO J.* **26**, 4029–4037 (2007). doi:10.1038/sj.emboj.7601832 [Medline](#)
32. M. J. Rust, J. S. Markson, W. S. Lane, D. S. Fisher, E. K. O’Shea, Ordered phosphorylation governs oscillation of a three-protein circadian clock. *Science* **318**, 809–812 (2007). doi:10.1126/science.1148596 [Medline](#)
33. I. Vakonakis, J. Sun, T. Wu, A. Holzenburg, S. S. Golden, A. C. LiWang, NMR structure of the KaiC-interacting C-terminal domain of KaiA, a circadian clock protein: Implications for KaiA-KaiC interaction. *Proc. Natl. Acad. Sci. U.S.A.* **101**, 1479–1484 (2004). doi:10.1073/pnas.0305516101 [Medline](#)
34. S. Ye, I. Vakonakis, T. R. Ioerger, A. C. LiWang, J. C. Sacchettini, Crystal structure of circadian clock protein KaiA from *Synechococcus elongatus*. *J. Biol. Chem.* **279**, 20511–20518 (2004). doi:10.1074/jbc.M400077200 [Medline](#)
35. S. B. Williams, I. Vakonakis, S. S. Golden, A. C. LiWang, Structure and function from the circadian clock protein KaiA of *Synechococcus elongatus*: A potential clock input mechanism. *Proc. Natl. Acad. Sci. U.S.A.* **99**, 15357–15362 (2002). doi:10.1073/pnas.232517099 [Medline](#)
36. H. Iwasaki, T. Nishiwaki, Y. Kitayama, M. Nakajima, T. Kondo, KaiA-stimulated KaiC phosphorylation in circadian timing loops in cyanobacteria. *Proc. Natl. Acad. Sci. U.S.A.* **99**, 15788–15793 (2002). doi:10.1073/pnas.222467299 [Medline](#)
37. Y. I. Kim, G. Dong, C. W. Carruthers Jr., S. S. Golden, A. LiWang, The day/night switch in KaiC, a central oscillator component of the circadian clock of cyanobacteria. *Proc. Natl. Acad. Sci. U.S.A.* **105**, 12825–12830 (2008). doi:10.1073/pnas.0800526105 [Medline](#)
38. I. Vakonakis, A. C. LiWang, Structure of the C-terminal domain of the clock protein KaiA in complex with a KaiC-derived peptide: Implications for KaiC regulation. *Proc. Natl. Acad. Sci. U.S.A.* **101**, 10925–10930 (2004). doi:10.1073/pnas.0403037101 [Medline](#)
39. Y. G. Chang, S. E. Cohen, C. Phong, W. K. Myers, Y.-I. Kim, R. Tseng, J. Lin, L. Zhang, J. S. Boyd, Y. Lee, S. Kang, D. Lee, S. Li, R. D. Britt, M. J. Rust, S. S. Golden, A. LiWang,

- A protein fold switch joins the circadian oscillator to clock output in cyanobacteria. *Science* **349**, 324–328 (2015). doi:10.1126/science.1260031 [Medline](#)
40. N. Takai, M. Nakajima, T. Oyama, R. Kito, C. Sugita, M. Sugita, T. Kondo, H. Iwasaki, A KaiC-associating SasA-RpaA two-component regulatory system as a major circadian timing mediator in cyanobacteria. *Proc. Natl. Acad. Sci. U.S.A.* **103**, 12109–12114 (2006). doi:10.1073/pnas.0602955103 [Medline](#)
  41. Y. Kitayama, H. Iwasaki, T. Nishiwaki, T. Kondo, KaiB functions as an attenuator of KaiC phosphorylation in the cyanobacterial circadian clock system. *EMBO J.* **22**, 2127–2134 (2003). doi:10.1093/emboj/cdg212 [Medline](#)
  42. Y. Xu, T. Mori, C. H. Johnson, Cyanobacterial circadian clockwork: Roles of KaiA, KaiB and the kaiBC promoter in regulating KaiC. *EMBO J.* **22**, 2117–2126 (2003). doi:10.1093/emboj/cdg168 [Medline](#)
  43. A. G. Murzin, Metamorphic proteins. *Science* **320**, 1725–1726 (2008). doi:10.1126/science.1158868 [Medline](#)
  44. C. Phong, J. S. Markson, C. M. Wilhoite, M. J. Rust, Robust and tunable circadian rhythms from differentially sensitive catalytic domains. *Proc. Natl. Acad. Sci. U.S.A.* **110**, 1124–1129 (2013). doi:10.1073/pnas.1212113110 [Medline](#)
  45. R. Murakami, R. Mutoh, K. Ishii, M. Ishiura, Circadian oscillations of KaiA-KaiC and KaiB-KaiC complex formations in an in vitro reconstituted KaiABC clock oscillator. *Genes Cells* **21**, 890–900 (2016). doi:10.1111/gtc.12392 [Medline](#)
  46. R. Murakami, R. Mutoh, R. Iwase, Y. Furukawa, K. Imada, K. Onai, M. Morishita, S. Yasui, K. Ishii, J. O. Valencia Swain, T. Uzumaki, K. Namba, M. Ishiura, The roles of the dimeric and tetrameric structures of the clock protein KaiB in the generation of circadian oscillations in cyanobacteria. *J. Biol. Chem.* **287**, 29506–29515 (2012). doi:10.1074/jbc.M112.349092 [Medline](#)
  47. R. Pattanayek, D. R. Williams, G. Rossi, S. Weigand, T. Mori, C. H. Johnson, P. L. Stewart, M. Egli, Combined SAXS/EM based models of the *S. elongatus* post-translational circadian oscillator and its interactions with the output His-kinase SasA. *PLOS ONE* **6**, e23697 (2011). doi:10.1371/journal.pone.0023697 [Medline](#)
  48. R. Mutoh, A. Nishimura, S. Yasui, K. Onai, M. Ishiura, The ATP-mediated regulation of KaiB-KaiC interaction in the cyanobacterial circadian clock. *PLOS ONE* **8**, e80200 (2013). doi:10.1371/journal.pone.0080200 [Medline](#)
  49. M. L. Paddock, J. S. Boyd, D. M. Adin, S. S. Golden, Active output state of the *Synechococcus* Kai circadian oscillator. *Proc. Natl. Acad. Sci. U.S.A.* **110**, E3849–E3857 (2013). doi:10.1073/pnas.1315170110 [Medline](#)
  50. J. Snijder, R. J. Burnley, A. Wiegand, A. S. J. Melquiond, A. M. J. J. Bonvin, I. M. Axmann, A. J. R. Heck, Insight into cyanobacterial circadian timing from structural details of the KaiB-KaiC interaction. *Proc. Natl. Acad. Sci. U.S.A.* **111**, 1379–1384 (2014). doi:10.1073/pnas.1314326111 [Medline](#)
  51. S. A. Villarreal, R. Pattanayek, D. R. Williams, T. Mori, X. Qin, C. H. Johnson, M. Egli, P. L. Stewart, CryoEM and molecular dynamics of the circadian KaiB-KaiC complex

- indicates that KaiB monomers interact with KaiC and block ATP binding clefts. *J. Mol. Biol.* **425**, 3311–3324 (2013). doi:10.1016/j.jmb.2013.06.018 [Medline](#)
52. R. Pattanayek, T. Mori, Y. Xu, S. Pattanayek, C. H. Johnson, M. Egli, Structures of KaiC circadian clock mutant proteins: A new phosphorylation site at T426 and mechanisms of kinase, ATPase and phosphatase. *PLOS ONE* **4**, e7529 (2009). doi:10.1371/journal.pone.0007529 [Medline](#)
53. M. Sugiyama, H. Yagi, K. Ishii, L. Porcar, A. Martel, K. Oyama, M. Noda, Y. Yunoki, R. Murakami, R. Inoue, N. Sato, Y. Oba, K. Terauchi, S. Uchiyama, K. Kato, Structural characterization of the circadian clock protein complex composed of KaiB and KaiC by inverse contrast-matching small-angle neutron scattering. *Sci. Rep.* **6**, 35567 (2016). doi:10.1038/srep35567 [Medline](#)
54. R. G. Garces, N. Wu, W. Gillon, E. F. Pai, Anabaena circadian clock proteins KaiA and KaiB reveal a potential common binding site to their partner KaiC. *EMBO J.* **23**, 1688–1698 (2004). doi:10.1038/sj.emboj.7600190 [Medline](#)
55. H. Kageyama, T. Nishiwaki, M. Nakajima, H. Iwasaki, T. Oyama, T. Kondo, Cyanobacterial circadian pacemaker: Kai protein complex dynamics in the KaiC phosphorylation cycle in vitro. *Mol. Cell* **23**, 161–171 (2006). doi:10.1016/j.molcel.2006.05.039 [Medline](#)
56. I. Vakonakis, A. T. Risinger, M. P. Latham, S. B. Williams, S. S. Golden, A. C. LiWang, Sequence-specific <sup>1</sup>H, <sup>13</sup>C and <sup>15</sup>N resonance assignments of the N-terminal, 135-residue domain of KaiA, a clock protein from *Synechococcus elongatus*. *J. Biomol. NMR* **21**, 179–180 (2001). doi:10.1023/A:1012478912174 [Medline](#)
57. R. Pattanayek, M. Egli, Protein-protein interactions in the cyanobacterial circadian clock: Structure of KaiA dimer in complex with C-terminal KaiC peptides at 2.8 Å resolution. *Biochemistry* **54**, 4575–4578 (2015). doi:10.1021/acs.biochem.5b00694 [Medline](#)
58. G. Dong, Q. Yang, Q. Wang, Y.-I. Kim, T. L. Wood, K. W. Osteryoung, A. van Oudenaarden, S. S. Golden, Elevated ATPase activity of KaiC applies a circadian checkpoint on cell division in *Synechococcus elongatus*. *Cell* **140**, 529–539 (2010). doi:10.1016/j.cell.2009.12.042 [Medline](#)
59. T. Mori, D. R. Williams, M. O. Byrne, X. Qin, M. Egli, H. S. Mchaourab, P. L. Stewart, C. H. Johnson, Elucidating the ticking of an in vitro circadian clockwork. *PLOS Biol.* **5**, e93 (2007). doi:10.1371/journal.pbio.0050093 [Medline](#)
60. X. Zhang, G. Dong, S. S. Golden, The pseudo-receiver domain of CikA regulates the cyanobacterial circadian input pathway. *Mol. Microbiol.* **60**, 658–668 (2006). doi:10.1111/j.1365-2958.2006.05138.x [Medline](#)
61. H. Xu, C. L. Gustafson, P. J. Sammons, S. K. Khan, N. C. Parsley, C. Ramanathan, H.-W. Lee, A. C. Liu, C. L. Partch, Cryptochrome 1 regulates the circadian clock through dynamic interactions with the BMAL1 C terminus. *Nat. Struct. Mol. Biol.* **22**, 476–484 (2015). doi:10.1038/nsmb.3018 [Medline](#)
62. P. Emsley, B. Lohkamp, W. G. Scott, K. Cowtan, Features and development of Coot. *Acta Crystallogr. D Biol. Crystallogr.* **66**, 486–501 (2010). doi:10.1107/S0907444910007493 [Medline](#)



63. P. D. Adams, P. V. Afonine, G. Bunkóczi, V. B. Chen, I. W. Davis, N. Echols, J. J. Headd, L.-W. Hung, G. J. Kapral, R. W. Grosse-Kunstleve, A. J. McCoy, N. W. Moriarty, R. Oeffner, R. J. Read, D. C. Richardson, J. S. Richardson, T. C. Terwilliger, P. H. Zwart, PHENIX: A comprehensive Python-based system for macromolecular structure solution. *Acta Crystallogr. D Biol. Crystallogr.* **66**, 213–221 (2010). doi:10.1107/S09074444909052925 [Medline](#)
64. E. Krissinel, K. Henrick, Inference of macromolecular assemblies from crystalline state. *J. Mol. Biol.* **372**, 774–797 (2007). doi:10.1016/j.jmb.2007.05.022 [Medline](#)
65. E. F. Pettersen, T. D. Goddard, C. C. Huang, G. S. Couch, D. M. Greenblatt, E. C. Meng, T. E. Ferrin, UCSF Chimera: A visualization system for exploratory research and analysis. *J. Comput. Chem.* **25**, 1605–1612 (2004). doi:10.1002/jcc.20084 [Medline](#)
66. S. R. Mackey, J. L. Ditty, E. M. Clerico, S. S. Golden, in *Methods in Molecular Biology*, E. Rosato, Ed. (Humana Press, New Jersey, 2007), pp. 115–130, vol. 362.
67. E. M. Clerico, J. L. Ditty, S. S. Golden, in *Methods in Molecular Biology*, E. Rosato, Ed. (Humana Press, New Jersey, 2007), pp. 155–172, vol. 362.
68. S. Li, T. Tsalkova, M. A. White, F. C. Mei, T. Liu, D. Wang, V. L. Woods Jr., X. Cheng, Mechanism of intracellular cAMP sensor Epac2 activation: cAMP-induced conformational changes identified by amide hydrogen/deuterium exchange mass spectrometry (DXMS). *J. Biol. Chem.* **286**, 17889–17897 (2011). doi:10.1074/jbc.M111.224535 [Medline](#)
69. F. Delaglio, S. Grzesiek, G. W. Vuister, G. Zhu, J. Pfeifer, A. Bax, NMRPipe: A multidimensional spectral processing system based on UNIX pipes. *J. Biomol. NMR* **6**, 277–293 (1995). doi:10.1007/BF00197809 [Medline](#)
70. D. S. Garrett, R. Powers, A. M. Gronenborn, G. M. Clore, A common sense approach to peak picking in two-, three-, and four-dimensional spectra using automatic computer analysis of contour diagrams. *J. Magn. Reson.* **95**, 214–220 (1991). [https://doi.org/10.1016/0022-2364\(91\)90341-p](https://doi.org/10.1016/0022-2364(91)90341-p)
71. D. S. Garrett, A. M. Gronenborn, G. M. Clore, A short recollection on the paper entitled “A common sense approach to peak picking in two-, three-, and four-dimensional spectra using automatic computer analysis of contour diagrams” by D.S. Garrett, R. Powers, A.M. Gronenborn, and G.M. Clore [J. Magn. Reson. 95 (1991) 214–220]. *J. Magn. Reson.* **213**, 364–365 (2011). doi:10.1016/j.jmr.2011.08.009 [Medline](#)
72. R. Sprangers, L. E. Kay, Quantitative dynamics and binding studies of the 20S proteasome by NMR. *Nature* **445**, 618–622 (2007). doi:10.1038/nature05512 [Medline](#)
73. V. Tugarinov, P. M. Hwang, J. E. Ollerenshaw, L. E. Kay, Cross-correlated relaxation enhanced  $^1\text{H}$ - $^{13}\text{C}$  NMR spectroscopy of methyl groups in very high molecular weight proteins and protein complexes. *J. Am. Chem. Soc.* **125**, 10420–10428 (2003). doi:10.1021/ja030153x [Medline](#)
74. M. P. Williamson, Using chemical shift perturbation to characterise ligand binding. *Prog. Nucl. Magn. Reson. Spectrosc.* **73**, 1–16 (2013). doi:10.1016/j.pnmrs.2013.02.001 [Medline](#)

75. L. Zhang, M. Derider, M. A. McCornack, S. C. Jao, N. Isern, T. Ness, R. Moyer, P. J. LiWang, Solution structure of the complex between poxvirus-encoded CC chemokine inhibitor vCCI and human MIP-1beta. *Proc. Natl. Acad. Sci. U.S.A.* **103**, 13985–13990 (2006). doi:10.1073/pnas.0602142103 [Medline](#)
76. G. Cornilescu, A. T. Ulijasz, C. C. Cornilescu, J. L. Markley, R. D. Vierstra, Solution structure of a cyanobacterial phytochrome GAF domain in the red-light-absorbing ground state. *J. Mol. Biol.* **383**, 403–413 (2008). doi:10.1016/j.jmb.2008.08.034 [Medline](#)
77. G. M. Clore, A. M. Gronenborn, Structures of larger proteins in solution: Three- and four-dimensional heteronuclear NMR spectroscopy. *Science* **252**, 1390–1399 (1991). doi:10.1126/science.2047852 [Medline](#)
78. C. D. Schwieters, J. J. Kuszewski, G. Marius Clore, Using Xplor–NIH for NMR molecular structure determination. *Prog. Nucl. Magn. Reson. Spectrosc.* **48**, 47–62 (2006). doi:10.1016/j.pnmrs.2005.10.001
79. Y. Tian, C. D. Schwieters, S. J. Opella, F. M. Marassi, A practical implicit solvent potential for NMR structure calculation. *J. Magn. Reson.* **243**, 54–64 (2014). doi:10.1016/j.jmr.2014.03.011 [Medline](#)
80. J. J. Chou, S. Li, A. Bax, Study of conformational rearrangement and refinement of structural homology models by the use of heteronuclear dipolar couplings. *J. Biomol. NMR* **18**, 217–227 (2000). doi:10.1023/A:1026563923774 [Medline](#)
81. V. B. Chen, W. B. Arendall 3rd, J. J. Headd, D. A. Keedy, R. M. Immormino, G. J. Kapral, L. W. Murray, J. S. Richardson, D. C. Richardson, MolProbity: All-atom structure validation for macromolecular crystallography. *Acta Crystallogr. D Biol. Crystallogr.* **66**, 12–21 (2010). doi:10.1107/S09074444909042073 [Medline](#)
82. S. R. Mackey, J.-S. Choi, Y. Kitayama, H. Iwasaki, G. Dong, S. S. Golden, Proteins found in a CikA interaction assay link the circadian clock, metabolism, and cell division in *Synechococcus elongatus*. *J. Bacteriol.* **190**, 3738–3746 (2008). doi:10.1128/JB.01721-07 [Medline](#)
